# Supplementary material for: Effects of Insomnia on Peptic Ulcer Disease Using Mendelian Randomization
Source: Oxid Med Cell Longev. 2021 Sep 25;2021:2216314. doi: 10.1155/2021/2216314 (PMC8487841; doi:10.1155/2021/2216314)
Supplement: Supplementary Materials — Supplementary Table 1: insomnia-associated SNPs. Supplementary Table 2: position mapping genes. Supplementary Table 3: eQTL mapping genes. Supplementary Table 4: chromatin interaction mapping genes. [file 2216314.f1.zip]

Archive with 4 entries (4 files):
- 2216314.f1.txt
- 2216314.f2.txt
- 2216314.f3.txt
- 2216314.f4.txt
