# Supplementary material for: Effects of Insomnia on Peptic Ulcer Disease Using Mendelian Randomization
Source: Oxid Med Cell Longev. 2021 Sep 25;2021:2216314. doi: 10.1155/2021/2216314 (PMC8487841; doi:10.1155/2021/2216314)
Supplement: Supplementary Materials — Supplementary Table 1: insomnia-associated SNPs. Supplementary Table 2: position mapping genes. Supplementary Table 3: eQTL mapping genes. Supplementary Table 4: chromatin interaction mapping genes. [file 2216314.f1.zip › 2216314.f1.txt]

					Insomnia Results			PUD Results
SNP	Chr	Bp	EA	NA	BETA	SE	P	BETA	SE	P
rs113851554	2	66750564	T	G	0.206200831	0.014	1.563E-51	0.019566138	0.025498463	0.44
rs9527083	13	53991125	A	G	-0.075801713	0.006	1.611E-32	-0.031392245	0.012006682	0.0089
rs10947428	6	33647058	T	C	-0.068278841	0.007	9.057E-21	-0.01552293	0.01358032	0.25
rs6119267	20	31163914	C	G	-0.059750004	0.006	2.32E-20	-0.007453603	0.012044826	0.54
rs62158170	2	114082175	A	G	0.065787741	0.007	1.203E-19	0.001305725	0.013630058	0.92
rs9394502	6	38452503	T	C	-0.054456186	0.006	7.756E-18	0.003219171	0.011861422	0.79
rs55972276	5	135653737	A	C	0.073250462	0.009	4.19E-17	-0.029365985	0.016300666	0.072
rs2431108	5	103947968	T	C	-0.053400777	0.006	7.83E-17	-0.007385121	0.011824641	0.53
rs7566062	2	66972843	T	C	0.05921186	0.007	1.369E-16	0.008888049	0.013308681	0.5
rs8180817	7	114047542	C	G	-0.049190244	0.006	1.831E-16	-0.022003821	0.011408142	0.054
rs118166957	9	8858043	T	C	0.067658648	0.008	1.951E-16	-0.008211901	0.015405541	0.59
rs13135092	4	103198082	A	G	-0.088831214	0.011	2.527E-16	-0.037497431	0.020037824	0.061
rs35322724	16	77137324	A	C	0.048790164	0.006	3.753E-16	-0.000854177	0.011380078	0.94
rs4702	15	91426560	A	G	-0.048140375	0.006	6.777E-16	-	-	-
rs2491124	13	53784083	T	C	0.048790164	0.006	8.809E-16	0.033827846	0.011303925	0.0028
rs16903122	5	87693561	T	C	0.055434707	0.007	9.038E-16	0.020428768	0.012784813	0.11
rs77641763	9	140265782	T	C	0.071389996	0.009	6.53E-15	-	-	-
rs1927902	9	120518991	T	C	0.05259245	0.007	1.147E-14	0.005084456	0.012768877	0.69
rs62264767	3	117642005	A	C	0.064850972	0.008	1.634E-14	0.028230419	0.015880269	0.075
rs1620977	1	72729142	A	G	0.051643233	0.007	2.272E-14	0.019169572	0.012498877	0.13
rs1015438	16	51177517	A	G	0.058268908	0.008	2.509E-14	0.054175494	0.014039117	0.00011
rs17643634	8	91650818	T	C	-0.059750004	0.008	1.341E-13	-0.023689673	0.015282806	0.12
rs28582096	12	123856998	A	G	-0.054456186	0.007	1.738E-13	-0.015713668	0.013874875	0.26
rs694786	3	173112907	T	C	-0.043951888	0.006	1.969E-13	-0.033278478	0.011162912	0.0029
rs2815757	1	72764289	T	C	0.055434707	0.008	2.238E-13	0.037723704	0.014273013	0.0082
rs78206187	2	67022234	A	G	-0.094310679	0.013	2.955E-13	-0.025649391	0.023975416	0.28
rs12912299	15	38897857	T	C	-0.042907501	0.006	4.416E-13	0.002375201	0.011283662	0.83
rs2903385	4	106094427	A	G	0.043059489	0.006	4.527E-13	-0.00191815	0.011146629	0.86
rs7214267	17	43157709	A	G	-0.043951888	0.006	5.093E-13	-0.001032996	0.011284524	0.93
rs314281	6	105400605	T	C	-0.042907501	0.006	6.029E-13	-0.012084971	0.011160275	0.28
rs11605348	11	47606483	A	G	-0.044997366	0.006	7.011E-13	0.009356073	0.011643876	0.42
rs4981170	14	33412996	A	G	-0.054456186	0.008	7.331E-13	-0.009868763	0.014141612	0.49
rs670501	7	108625185	T	C	0.05259245	0.007	7.398E-13	-0.010444808	0.013639398	0.44
rs11126082	2	66789341	C	G	-0.042907501	0.006	8.257E-13	-0.017343992	0.011419965	0.13
rs9931543	16	56128782	T	C	0.047837329	0.007	1.111E-12	-0.007141759	0.0126245	0.57
rs524859	11	66041079	A	G	-0.043951888	0.006	1.478E-12	0.002067032	0.011567774	0.86
rs72657797	4	90820809	T	C	-0.05551271	0.008	1.522E-12	0.001642403	0.014584774	0.91
rs60565673	18	52906830	T	G	-0.042907501	0.006	1.591E-12	-0.000795855	0.011710066	0.95
rs10761240	9	96361922	A	G	-0.042907501	0.006	2.122E-12	-0.01648769	0.01139308	0.15
rs66674044	16	19904344	A	T	-0.059750004	0.009	2.184E-12	-0.011107523	0.015932741	0.49
rs12666306	7	115082406	A	G	0.042101176	0.006	2.24E-12	0.01963862	0.011239173	0.081
rs10800992	1	190900576	T	C	0.042101176	0.006	3.835E-12	0.002669698	0.011181192	0.81
rs1031654	13	54382035	A	C	-0.051293294	0.007	3.881E-12	0.009445065	0.013918155	0.5
rs10947690	6	37631768	A	G	-0.047091608	0.007	4.039E-12	0.00519591	0.012675558	0.68
rs9889282	17	50259142	A	C	-0.041864204	0.006	4.697E-12	-0.011812109	0.011461338	0.3
rs56133505	11	72348039	A	G	0.041141943	0.006	5.591E-12	0.010433723	0.011211568	0.35
rs7044885	9	81739348	C	G	-0.040821995	0.006	5.673E-12	0.017971167	0.011221545	0.11
rs3774751	3	50209053	T	G	-0.040821995	0.006	7.322E-12	-0.030790131	0.011166469	0.0058
rs61921611	12	66367726	T	C	-0.043951888	0.006	7.839E-12	-0.004493213	0.012075068	0.71
rs715338	15	57215867	A	G	0.041141943	0.006	7.853E-12	0.027057691	0.011346868	0.017
rs830716	16	12323509	C	G	0.044973366	0.007	8.676E-12	-0.013280534	0.012313397	0.28
rs13010288	2	51824512	T	G	-0.059750004	0.009	9.257E-12	-0.015513596	0.016541315	0.35
rs12983032	19	5073447	A	G	-0.042907501	0.006	1.065E-11	0.000486004	0.011694831	0.97
rs8180457	5	107209814	T	C	-0.05551271	0.008	1.12E-11	0.003028049	0.015339692	0.84
rs6545798	2	60521311	A	T	-0.040821995	0.006	1.186E-11	0.00927625	0.011578913	0.42
rs908668	19	56134038	T	C	0.049742092	0.007	1.411E-11	5.83229E-05	0.013744763	1
rs79693059	11	72340686	C	G	-0.072570693	0.011	1.607E-11	-0.041267517	0.019727008	0.036
rs10865954	3	49211989	T	C	0.042101176	0.006	1.919E-11	0.021068327	0.011755109	0.073
rs9373590	6	101212001	A	T	0.04018179	0.006	2.18E-11	0.029907954	0.011141489	0.0073
rs12991815	2	68071990	C	G	0.04018179	0.006	3.015E-11	0.004217783	0.01129784	0.71
rs61765555	1	73957815	T	C	-0.044997366	0.007	3.999E-11	-0.01885837	0.012815841	0.14
rs12310246	12	84700945	A	G	0.044973366	0.007	4.744E-11	0.002653887	0.012874349	0.84
rs55772859	2	208042581	A	C	0.042101176	0.006	4.821E-11	0.024367635	0.011982631	0.042
rs6808140	3	10581380	T	C	0.039220713	0.006	5.351E-11	0.008764829	0.011190069	0.43
rs67501351	16	20006745	C	G	0.044973366	0.007	5.363E-11	0.019026367	0.012851446	0.14
rs2286729	12	6873818	A	G	0.069526063	0.011	5.374E-11	0.00957287	0.019635868	0.63
rs7486418	12	84336911	T	G	0.041141943	0.006	6.837E-11	0.006244662	0.011781515	0.6
rs11803128	1	190060095	A	G	-0.040821995	0.006	6.852E-11	0.014497414	0.011756746	0.22
rs28611339	8	10170037	T	G	0.058268908	0.009	8.456E-11	-0.033699728	0.016823442	0.045
rs10502966	18	50748499	A	G	-0.038740828	0.006	8.537E-11	-0.01429519	0.017256903	0.41
rs35110063	3	43066558	A	G	0.039220713	0.006	8.817E-11	-0.016741956	0.011244363	0.14
rs2792990	9	125621610	C	G	0.054488185	0.008	1.152E-10	0.005949904	0.015862452	0.71
rs566673	11	66401373	T	G	-0.038740828	0.006	1.18E-10	-0.012448191	0.01120959	0.27
rs6888135	5	141254063	A	C	0.038258712	0.006	1.207E-10	0.001439197	0.011123077	0.9
rs6562066	13	60532796	T	C	0.039220713	0.006	1.379E-10	-0.000771525	0.011554965	0.95
rs6967168	7	132672192	T	G	-0.043951888	0.007	1.39E-10	-0.001989524	0.012873302	0.88
rs4643373	17	47123423	T	C	0.041141943	0.007	1.582E-10	0.007617769	0.012168708	0.53
rs12187443	5	102660400	T	C	0.04018179	0.006	1.641E-10	0.024103347	0.011860373	0.042
rs1861412	2	58893065	A	G	0.038258712	0.006	1.668E-10	0.030873416	0.011311024	0.0063
rs2389631	13	96932868	A	C	-0.03978087	0.006	2.027E-10	-0.026141449	0.011774606	0.026
rs116466468	2	159137557	T	C	0.044016885	0.007	2.106E-10	-0.011093926	0.013123979	0.4
rs1064939	11	118396331	A	T	0.130150684	0.02	2.162E-10	-0.004539651	0.038154688	0.91
rs4238755	16	52746089	A	C	-0.042907501	0.007	2.299E-10	-0.021491023	0.01267566	0.09
rs17223714	5	50492629	A	G	0.045928932	0.007	2.435E-10	-0.006691681	0.01359422	0.62
rs1038093	15	74012409	T	C	0.039220713	0.006	2.466E-10	0.018752925	0.011564678	0.1
rs224029	10	64519299	T	C	-0.038740828	0.006	2.507E-10	-0.021224764	0.011359938	0.062
rs3902952	16	61647589	T	C	0.047837329	0.008	2.545E-10	-0.013689632	0.014392486	0.34
rs56097173	2	44262449	T	C	0.04018179	0.006	2.693E-10	-0.013232768	0.011929196	0.27
rs2089358	1	37194103	T	C	-0.040821995	0.007	2.745E-10	-0.015115588	0.012258314	0.22
rs8076183	17	61024696	T	C	-0.037701867	0.006	2.754E-10	0.012089843	0.011211464	0.28
rs671985	8	60914783	A	G	-0.037701867	0.006	2.79E-10	0.001044013	0.011200461	0.93
rs12251016	10	21821918	A	T	-0.038740828	0.006	3.89E-10	-0.026213554	0.011682747	0.025
rs4592425	11	62697813	T	G	0.04018179	0.006	4.31E-10	-0.007782624	0.012150272	0.52
rs12790660	11	57667222	T	C	-0.03978087	0.006	4.486E-10	0.013384269	0.011979338	0.26
rs152555	5	106849674	A	G	-0.05234648	0.008	4.831E-10	-0.017482194	0.015619952	0.26
rs17324524	23	133134421	T	C	-0.057629113	0.009	5.01E-10	-	-	-
rs2398144	16	56352854	A	C	0.038258712	0.006	5.091E-10	-0.002412646	0.011527367	0.83
rs11838830	13	60362013	A	G	-0.080126044	0.013	5.196E-10	-0.047901614	0.023677353	0.043
rs823247	2	2850540	T	C	-0.036663984	0.006	5.246E-10	-0.006828221	0.011257262	0.54
rs73671843	7	3520024	A	G	-0.05551271	0.009	5.492E-10	-0.022783089	0.017198337	0.19
rs17005118	4	82288564	A	G	0.042101176	0.007	6.128E-10	0.025671325	0.012557083	0.041
rs1064213	2	198950240	A	G	-0.036663984	0.006	6.407E-10	0.029181406	0.011119917	0.0087
rs4767645	12	118385788	T	G	-0.036663984	0.006	6.47E-10	0.014354031	0.011357368	0.21
rs6019663	20	47774512	T	C	0.04018179	0.007	6.474E-10	9.0994E-05	0.012190069	0.99
rs3131638	6	31475127	A	G	-0.043951888	0.007	7.88E-10	0.007238586	0.013247471	0.58
rs984306	2	66817402	T	C	-0.042907501	0.007	7.937E-10	-0.016979713	0.012860432	0.19
rs4502882	5	153093998	T	C	-0.038740828	0.006	7.961E-10	-0.01852904	0.011700575	0.11
rs940780	7	3323848	T	C	0.038258712	0.006	8.498E-10	0.028241314	0.011542564	0.014
rs1530938	2	236900633	A	G	0.036331929	0.006	8.823E-10	0.010858906	0.011202408	0.33
rs8181889	13	53613990	A	G	-0.037701867	0.006	8.898E-10	-0.016373123	0.011372447	0.15
rs1264419	6	30576781	C	G	0.036331929	0.006	8.907E-10	-0.00491108	0.011126174	0.66
rs3184470	16	715164	A	G	-0.037701867	0.006	9.726E-10	0.017008549	0.01164385	0.14
rs1147852	6	147980909	A	G	0.039220713	0.006	9.935E-10	0.011391896	0.012006608	0.34
rs72899452	11	45415577	T	C	0.074179398	0.012	1.002E-09	0.017533661	0.02242953	0.43
rs6756610	2	147480394	C	G	0.037295785	0.006	1.135E-09	-0.002276503	0.011599434	0.84
rs62068188	17	2400876	T	C	0.048790164	0.008	1.184E-09	0.050970488	0.015462823	0.00098
rs6702604	1	107190062	A	G	-0.036663984	0.006	1.303E-09	0.014105167	0.011277994	0.21
rs2388840	6	99598756	A	G	-0.036663984	0.006	1.368E-09	-0.012442161	0.011286892	0.27
rs9540729	13	66947124	A	T	0.036331929	0.006	1.403E-09	0.011750096	0.011123235	0.29
rs12540241	7	3824141	A	T	-0.046043939	0.008	1.576E-09	-0.016907097	0.014236323	0.23
rs324017	12	57487814	A	C	0.039220713	0.007	1.609E-09	0.027299873	0.012150306	0.025
rs12520974	5	61514611	T	C	-0.035627178	0.006	1.685E-09	-0.021165403	0.011130268	0.057
rs4790076	17	2243628	T	C	0.047837329	0.008	1.757E-09	0.00939113	0.014726193	0.52
rs62429521	6	140324582	A	C	0.050693114	0.008	1.776E-09	0.001817137	0.015810821	0.91
rs6734957	2	42813247	T	G	-0.041864204	0.007	1.817E-09	-0.005508842	0.013181393	0.68
rs11090039	22	41496800	A	G	0.039220713	0.007	1.822E-09	-0.009374455	0.012348981	0.45
rs6465151	7	88310899	T	C	0.056380333	0.009	1.902E-09	0.01367016	0.017551458	0.44
rs2221119	11	88598444	C	G	0.036331929	0.006	2.003E-09	0.001972294	0.011201143	0.86
rs12605642	18	31313965	T	G	0.035367144	0.006	2.129E-09	-0.002696906	0.011144627	0.81
rs11149313	13	85294881	A	G	0.04018179	0.007	2.376E-09	-0.006513604	0.01262411	0.61
rs2598293	7	133989882	T	C	0.035367144	0.006	2.478E-09	0.007497965	0.011111298	0.5
rs7615602	3	18718055	C	G	-0.03978087	0.007	2.589E-09	-0.002486835	0.012527694	0.84
rs4709655	6	163280204	T	C	-0.054456186	0.009	3.088E-09	6.10584E-06	0.017377097	1
rs11679943	2	77724624	A	G	0.037295785	0.006	3.155E-09	0.005610734	0.011661523	0.63
rs214934	11	17193475	A	T	-0.037701867	0.006	3.163E-09	-0.013178549	0.01199456	0.27
rs34214423	16	52303107	A	C	0.044973366	0.008	3.178E-09	0.012022483	0.014177896	0.4
rs71575448	5	106918329	A	G	0.050693114	0.009	3.38E-09	-0.003254776	0.015986768	0.84
rs492858	3	155432229	T	C	-0.066139803	0.011	3.458E-09	-0.022878297	0.021280173	0.28
rs72773790	9	139109080	T	C	0.037295785	0.006	3.714E-09	-0.003282881	0.011851196	0.78
rs7040224	9	134886837	A	G	0.037295785	0.006	4.242E-09	0.032960502	0.011881025	0.0055
rs34967082	2	215382654	A	G	0.035367144	0.006	4.34E-09	-0.009874763	0.01136176	0.38
rs45453598	16	52637892	A	T	0.046883586	0.008	4.422E-09	-0.000927942	0.015053135	0.95
rs35539975	5	91607148	A	G	0.042101176	0.007	4.492E-09	0.005701673	0.013394891	0.67
rs62590551	23	21494390	A	G	0.054488185	0.01	4.61E-09	-	-	-
rs62194948	2	239222376	C	G	0.039220713	0.007	4.644E-09	-0.002399542	0.012437024	0.85
rs6589988	11	99126016	A	G	-0.037701867	0.006	4.699E-09	0.001415484	0.011891003	0.91
rs37445	5	106899684	A	G	-0.035627178	0.006	4.882E-09	-0.019040899	0.011523096	0.098
rs10758593	9	4292083	A	G	-0.035627178	0.006	4.899E-09	-0.034139465	0.01137373	0.0027
rs12454003	18	26315799	C	G	-0.034591445	0.006	4.94E-09	-0.017172302	0.011211485	0.13
rs4664299	2	160570033	T	C	-0.040821995	0.007	4.953E-09	-0.005762649	0.013280854	0.66
rs7599697	2	239231477	T	C	-0.036663984	0.006	4.999E-09	0.005696166	0.011607725	0.62
rs11588755	1	57819204	A	G	-0.034591445	0.006	5.142E-09	-0.004475401	0.011136999	0.69
rs7402939	15	99183876	T	C	-0.035627178	0.006	5.191E-09	-0.00051968	0.011654608	0.96
rs7625896	3	44062561	A	G	0.036331929	0.006	5.279E-09	-0.014685207	0.011786621	0.21
rs871994	8	35190619	A	C	0.035367144	0.006	5.498E-09	0.022002103	0.011193555	0.049
rs9316619	13	53978628	T	C	0.045928932	0.008	5.503E-09	0.019117078	0.014721946	0.19
rs62149809	2	73853830	A	G	0.147557564	0.025	5.713E-09	0.025078622	0.047846857	0.6
rs1289939	1	117944435	T	C	-0.040821995	0.007	5.995E-09	0.006699354	0.013132839	0.61
rs1536053	13	111982291	T	C	-0.037701867	0.006	6.043E-09	0.021007362	0.01197527	0.079
rs4788203	16	29978827	A	G	-0.034591445	0.006	6.323E-09	-0.000269203	0.011306764	0.98
rs7475916	10	77771194	C	G	-0.036663984	0.006	6.7E-09	-0.019841928	0.011784151	0.092
rs701394	5	80296487	A	G	-0.035627178	0.006	6.826E-09	-0.006648169	0.011551214	0.56
rs12614369	2	66792109	A	G	0.044016885	0.008	7.214E-09	0.023656105	0.014434912	0.1
rs7432782	3	48941551	T	C	-0.083381609	0.014	7.417E-09	0.006633844	0.027063649	0.81
rs2838787	21	46539725	A	G	-0.035627178	0.006	7.654E-09	0.004277484	0.011433686	0.71
rs874168	8	30849450	T	C	0.034401427	0.006	7.946E-09	0.008966854	0.011135545	0.42
rs10944696	6	94498850	A	G	-0.037701867	0.007	7.994E-09	-0.004225773	0.012232212	0.73
rs10898940	11	73455292	A	C	0.034401427	0.006	8.093E-09	0.010303817	0.011344395	0.36
rs12030482	1	96961268	A	T	0.041141943	0.007	8.161E-09	-0.000578781	0.013422591	0.97
rs4090240	9	77118987	T	C	-0.038740828	0.007	8.455E-09	-0.01361921	0.012456012	0.27
rs1167132	12	43484487	T	C	0.035367144	0.006	8.732E-09	0.000119139	0.011382602	0.99
rs17367725	5	107112116	T	C	-0.035627178	0.006	9.285E-09	0.012849364	0.011660946	0.27
rs176644	15	89913632	T	G	0.035367144	0.006	9.491E-09	0.008894373	0.011414146	0.44
rs728017	6	124292594	A	G	-0.034591445	0.006	9.509E-09	0.007551612	0.01138803	0.51
rs2030672	7	21687925	C	G	0.034401427	0.006	1.098E-08	-0.017111338	0.011202034	0.13
rs6457796	6	34828553	T	C	-0.038740828	0.007	1.12E-08	0.002620283	0.01256214	0.83
rs7992992	13	54721699	A	G	0.050693114	0.009	1.152E-08	0.012666973	0.016557142	0.44
rs11119409	1	210293333	T	C	-0.034591445	0.006	1.193E-08	0.013431206	0.011336362	0.24
rs4858708	3	25154112	A	T	-0.033556784	0.006	1.226E-08	0.00722179	0.011201085	0.52
rs11650304	17	46035001	C	G	0.066723632	0.012	1.227E-08	-0.005396643	0.02190528	0.81
rs5877	1	173878862	T	C	0.036331929	0.006	1.228E-08	-	-	-
rs72820274	2	104412924	A	G	0.034401427	0.006	1.279E-08	0.019707318	0.011325168	0.082
rs11756035	6	18843810	C	G	0.050693114	0.009	1.288E-08	-0.018279481	0.01692497	0.28
rs1731951	7	137075847	A	T	-0.034591445	0.006	1.355E-08	-0.014401269	0.011383068	0.21
rs62301574	4	22050165	C	G	-0.041864204	0.007	1.37E-08	-	-	-
rs1357685	7	109200331	T	C	0.033434776	0.006	1.385E-08	0.028287851	0.011168532	0.011
rs73163783	3	117602144	T	C	-0.037701867	0.007	1.393E-08	-0.015723379	0.01238445	0.2
rs7571486	2	176473295	A	G	-0.038740828	0.007	1.403E-08	0.002601618	0.012823226	0.84
rs138678612	6	30932223	A	G	-0.116533816	0.02	1.409E-08	0.103307732	0.051712066	0.046
rs10825503	10	57177470	T	G	0.033434776	0.006	1.426E-08	0.012593708	0.011122497	0.26
rs6606731	12	109982578	A	T	0.043059489	0.008	1.506E-08	-0.003088447	0.014119487	0.83
rs521484	7	49894349	A	G	-0.03978087	0.007	1.53E-08	-0.003345992	0.013148488	0.8
rs4588900	8	73890425	A	G	0.033434776	0.006	1.571E-08	0.016809758	0.011126419	0.13
rs75452188	2	67134426	A	G	0.051643233	0.009	1.583E-08	-0.005777844	0.017028593	0.73
rs2216427	3	180785697	C	G	0.035367144	0.006	1.595E-08	0.004680216	0.011701079	0.69
rs17083297	5	92995477	A	C	-0.043951888	0.008	0.000000016	-0.009963589	0.014619413	0.5
rs10928256	2	146458738	T	C	0.034401427	0.006	1.614E-08	-0.005903025	0.01148324	0.61
rs910187	20	45841052	A	G	-0.034591445	0.006	1.631E-08	-0.00419364	0.011501105	0.72
rs34490907	17	26933741	C	G	0.053540767	0.009	1.755E-08	0.024667498	0.017809969	0.17
rs7168238	15	66709386	C	G	0.063913326	0.011	1.798E-08	0.009458402	0.021131934	0.65
rs10756571	9	14534505	T	C	0.036331929	0.006	1.799E-08	-0.013731317	0.012174389	0.26
rs10955647	8	114154187	T	G	0.033434776	0.006	1.836E-08	0.007639527	0.011141356	0.49
rs1519102	2	66677816	C	G	-0.036663984	0.006	1.903E-08	-0.020564746	0.012054832	0.088
rs12924275	16	9191790	T	C	0.038258712	0.007	1.925E-08	0.025401035	0.012544493	0.043
rs16990210	4	34720226	T	C	-0.046043939	0.008	1.965E-08	-0.014209073	0.015426961	0.36
rs13138995	4	148987430	A	G	0.034401427	0.006	1.974E-08	-0.002475818	0.011606543	0.83
rs34036083	2	66815719	T	C	-0.035627178	0.006	2.066E-08	0.001461671	0.011750338	0.9
rs1937447	1	66358242	C	G	-0.038740828	0.007	2.075E-08	-0.016463816	0.012926427	0.2
rs6978112	7	1966841	T	C	0.034401427	0.006	2.11E-08	0.024490871	0.011339314	0.031
rs429358	19	45411941	T	C	0.045928932	0.008	2.125E-08	-0.006531206	0.015341112	0.67
rs2364921	3	158522463	T	C	-0.033556784	0.006	2.129E-08	-0.016371285	0.011187767	0.14
rs1567084	3	71435955	A	G	0.033434776	0.006	2.136E-08	0.014015961	0.011224483	0.21
rs17025198	3	88001713	A	G	0.041141943	0.007	2.185E-08	0.001201777	0.01381934	0.93
rs6601080	5	179511043	A	G	0.035367144	0.006	2.211E-08	0.000982271	0.011951552	0.93
rs667730	11	83277325	T	C	0.033434776	0.006	2.263E-08	0.014739914	0.011260613	0.19
rs1580173	3	107955515	A	G	0.033434776	0.006	2.28E-08	0.009779744	0.011236355	0.38
rs62213452	2	210380152	T	G	0.037295785	0.007	2.385E-08	0.024110836	0.012356419	0.051
rs742760	20	50985290	A	T	0.043059489	0.008	2.475E-08	0.024899937	0.014441502	0.085
rs2447094	17	2294048	A	C	-0.033556784	0.006	2.503E-08	-0.001571439	0.011148104	0.89
rs11001276	10	76825638	A	T	-0.037701867	0.007	2.523E-08	-0.029302271	0.012663957	0.021
rs76145129	20	62670427	T	G	-0.050241216	0.009	2.733E-08	-0.000935079	0.016956581	0.96
rs190073	7	10985188	A	G	-0.033556784	0.006	2.857E-08	-0.019420782	0.011410732	0.089
rs17520265	7	119674508	A	G	-0.091019398	0.016	2.872E-08	-0.060284715	0.031555472	0.056
rs647905	11	121534938	T	C	0.033434776	0.006	2.872E-08	-0.00363076	0.011133787	0.74
rs11722569	4	112822731	T	C	0.034401427	0.006	2.912E-08	0.006567709	0.01177047	0.58
rs12917449	15	74331659	A	C	-0.041864204	0.008	2.965E-08	0.012655846	0.014176989	0.37
rs6597649	9	133786652	T	C	0.033434776	0.006	3.048E-08	0.016284798	0.011347189	0.15
rs9563886	13	61720066	T	C	-0.033556784	0.006	3.078E-08	0.004333591	0.011409303	0.7
rs623025	1	201765094	T	C	-0.037701867	0.007	3.159E-08	-0.00605203	0.012840689	0.64
rs28552587	8	103356226	A	G	0.033434776	0.006	3.299E-08	0.021823124	0.011230626	0.052
rs238869	6	29355113	T	C	-0.033556784	0.006	3.356E-08	0.011000698	0.011469173	0.34
rs2737240	8	116657235	A	G	0.036331929	0.007	3.373E-08	0.000945929	0.012277992	0.94
rs138014720	3	50070843	A	T	0.069526063	0.013	3.461E-08	0.017371536	0.023760849	0.46
rs1553754	17	46563707	T	G	-0.033556784	0.006	3.507E-08	-0.000555958	0.011298968	0.96
rs117630493	13	54018867	C	G	-0.100925919	0.018	3.608E-08	-0.043482242	0.033601422	0.2
rs73079014	3	49863483	T	C	-0.049190244	0.009	3.647E-08	0.016201387	0.016689057	0.33
rs2867690	20	41972028	T	C	0.042101176	0.008	3.701E-08	-0.013210338	0.014573718	0.36
rs62383308	5	165460085	A	G	-0.059750004	0.011	3.975E-08	-0.021057651	0.020709268	0.31
rs4699157	4	106055212	T	C	-0.081210055	0.015	3.981E-08	-0.042537497	0.027309526	0.12
rs10947987	6	41754370	T	C	-0.032523192	0.006	4.08E-08	-0.000994937	0.01118616	0.93
rs699844	1	74878253	A	G	0.060153923	0.011	4.11E-08	0.029033857	0.020798961	0.16
rs75932578	7	106844694	T	C	-0.03978087	0.007	4.149E-08	-0.017625183	0.013608978	0.2
rs79204944	13	53969796	A	G	0.07881118	0.014	4.244E-08	0.049026035	0.026442147	0.064
rs6973090	7	102008352	A	G	-0.037701867	0.007	4.312E-08	0.012886039	0.012892272	0.32
rs9469434	6	33455574	C	G	-0.035627178	0.007	4.413E-08	-0.000313613	0.012365431	0.98
rs9964420	18	56824041	A	C	0.035367144	0.007	4.54E-08	0.003875177	0.012184017	0.75
rs6510033	19	30710785	A	G	-0.036663984	0.007	4.661E-08	-0.011487771	0.012433008	0.36
rs4260410	3	178469932	T	C	0.034401427	0.006	4.869E-08	0.009366986	0.011775541	0.43
