# Supplementary material for: Effects of Insomnia on Peptic Ulcer Disease Using Mendelian Randomization
Source: Oxid Med Cell Longev. 2021 Sep 25;2021:2216314. doi: 10.1155/2021/2216314 (PMC8487841; doi:10.1155/2021/2216314)
Supplement: Supplementary Materials — Supplementary Table 1: insomnia-associated SNPs. Supplementary Table 2: position mapping genes. Supplementary Table 3: eQTL mapping genes. Supplementary Table 4: chromatin interaction mapping genes. [file 2216314.f1.zip › 2216314.f2.txt]

Gene	Chr	Start Bp	End Bp	GWAS P	SNPs
DAB1	1	57,460,451	59012406	5.14E-09	1:57819204:A_G;1:57849697:C_T;1:57850914:A_C;1:57859402:A_G
PDE4B	1	66,258,197	66840259	2.08E-08	1:66358242:C_G;1:66414039:C_T
NEGR1	1	71,861,623	72748417	2.27E-14	1:72619961:A_C;1:72729142:A_G;1:72764289:C_T;1:72939855:A_C;1:73735403:C_G;1:72635996:A_C;1:72825144:A_T;1:72904288:A_G;1:72747844:C_T
FPGT-TNNI3K	1	74,663,919	75009666	4.11E-08	1:74878253:A_G
TNNI3K	1	74,663,947	75010112	4.11E-08	1:74878253:A_G
MAN1A2	1	117,910,071	118071494	6.00E-09	1:117944435:C_T
KLHL20	1	173,684,080	173755840	1.23E-08	1:173878862:C_T
SERPINC1	1	173,872,947	173886516	1.23E-08	1:173878862:C_T
DARS2	1	173,793,641	173827684	1.23E-08	1:173878862:C_T
ZBTB37	1	173,837,220	173872687	1.34E-08	1:173878862:C_T
CENPL	1	173,768,688	173793858	2.79E-08	1:173878862:C_T
BRINP3	1	190,066,792	190446759	9.26E-12	1:190371291:A_G;1:190060095:A_G;1:190129396:C_T;1:190136798:A_G
IPO9	1	201,798,269	201853422	9.10E-08	1:201765094:C_T
SYT14	1	210,111,538	210337636	1.19E-08	1:210293333:C_T
MTA3	2	42,721,709	42984087	1.82E-09	2:42813247:G_T;2:43110476:C_G
KCNG3	2	42,669,157	42721237	2.26E-08	2:42813247:G_T
HAAO	2	42,994,229	43019733	1.82E-09	2:42813247:G_T;2:43110476:C_G
STAMBP	2	74,056,086	74100786	4.76E-08	2:73853830:A_G
ALMS1	2	73,612,886	73837920	1.02E-08	2:73853830:A_G
LRRTM4	2	76,974,845	77820445	3.16E-09	2:77724624:A_G
PKP4	2	159,313,476	159539391	3.27E-10	2:159137557:C_T
CCDC148	2	159,027,593	159313265	2.11E-10	2:159064708:C_G;2:159137557:C_T;2:159144192:A_T
Mar-07	2	160,569,000	160627538	4.95E-09	2:160415477:C_T;2:160570033:C_T
LY75-CD302	2	160,628,362	160761221	4.95E-09	2:160415477:C_T;2:160570033:C_T
BAZ2B	2	160,175,490	160473203	4.95E-09	2:160415477:C_T;2:160570033:C_T
LY75	2	160,628,362	160761260	4.95E-09	2:160415477:C_T;2:160570033:C_T
PLCL1	2	198,669,426	199437305	6.41E-10	2:198438425:C_T;2:198950240:A_G;2:198735712:A_G
HSPE1-MOB4	2	198,365,137	198415450	8.63E-08	2:198438425:C_T;2:198735712:A_G
MOB4	2	198,380,295	198418423	8.63E-08	2:198438425:C_T;2:198735712:A_G
HSPD1	2	198,351,305	198381461	8.63E-08	2:198438425:C_T
BOLL	2	198,591,603	198651486	2.05E-08	2:198438425:C_T;2:198950240:A_G;2:198735712:A_G
RFTN2	2	198,432,948	198540769	6.41E-10	2:198438425:C_T;2:198735712:A_G;2:198950240:A_G
SF3B1	2	198,254,508	198299815	3.29E-08	2:198438425:C_T;2:198735712:A_G;2:198950240:A_G
COQ10B	2	198,318,147	198340032	3.98E-08	2:198438425:C_T
KLF7	2	207,938,861	208031991	4.82E-11	2:208042581:A_C
MAP2	2	210,288,782	210598842	2.39E-08	2:210380152:G_T
AGAP1	2	236,402,733	237040444	8.82E-10	2:236900633:A_G;2:236924303:C_T
TRAF3IP1	2	239,229,082	239309541	4.64E-09	2:239222376:C_G;2:239231477:C_T
ATP2B2	3	10,365,707	10749716	5.35E-11	3:10581380:C_T;3:10623367:C_T;3:10608121:C_T
RARB	3	25,215,823	25639423	7.79E-06	3:25154112:A_T
FAM198A	3	43,020,759	43101703	8.82E-11	3:43066558:A_G
RBM5	3	50,126,341	50156454	7.32E-12	3:49899795:A_G;3:50209053:G_T;3:50218879:C_T;3:49860854:C_T;3:49890613:C_T
APEH	3	49,711,435	49721396	4.04E-11	3:49621994:C_T;3:49863483:C_T;3:49890613:C_T;3:49899795:A_G;3:50070843:A_T;3:50209053:G_T
FAM212A	3	49,840,687	49842463	7.32E-12	3:49863483:C_T;3:49890613:C_T;3:49899795:A_G;3:50209053:G_T;3:49621994:C_T;3:49860854:C_T;3:50218879:C_T
QRICH1	3	49,067,140	49131796	1.92E-11	3:49863483:C_T;3:49211989:C_T;3:49621994:C_T;3:48941551:C_T
UBA7	3	49,842,640	49851379	7.32E-12	3:49863483:C_T;3:49890613:C_T;3:49899795:A_G;3:50209053:G_T;3:49621994:C_T;3:49860854:C_T;3:50218879:C_T
CAMKV	3	49,895,421	49907655	1.05E-10	3:49621994:C_T;3:49863483:C_T;3:49890613:C_T;3:49899795:A_G;3:50209053:G_T
TRAIP	3	49,866,034	49894007	4.04E-11	3:49621994:C_T;3:49863483:C_T;3:49890613:C_T
GNAT1	3	50,229,045	50233949	3.58E-11	3:49899795:A_G;3:50209053:G_T;3:50297330:A_G;3:50218879:C_T
RBM6	3	49,977,440	50137478	7.32E-12	3:49621994:C_T;3:49860854:C_T;3:49863483:C_T;3:49890613:C_T;3:49899795:A_G;3:50070843:A_T;3:50209053:G_T;3:50218879:C_T;3:50297330:A_G
ARIH2	3	48,956,254	49023815	1.92E-11	3:49200137:G_T;3:49211989:C_T;3:49621994:C_T;3:49863483:C_T;3:48941551:C_T
DAG1	3	49,506,146	49573048	7.99E-10	3:49890613:C_T;3:48941551:C_T;3:49863483:C_T
KLHDC8B	3	49,209,044	49213917	1.92E-11	3:49200137:G_T;3:49211989:C_T;3:49621994:C_T
GMPPB	3	49,754,277	49761384	4.04E-11	3:49621994:C_T;3:49860854:C_T;3:49863483:C_T;3:49890613:C_T;3:49899795:A_G;3:50209053:G_T
CCDC36	3	49,235,861	49295537	1.92E-11	3:49200137:G_T;3:49211989:C_T;3:49621994:C_T
C3orf62	3	49,306,035	49315342	1.92E-11	3:49200137:G_T;3:49211989:C_T;3:49621994:C_T;3:48941551:C_T
AMIGO3	3	49,754,267	49761349	4.04E-11	3:49621994:C_T;3:49860854:C_T;3:49863483:C_T;3:49890613:C_T;3:49899795:A_G;3:50209053:G_T
RHOA	3	49,396,578	49450431	4.58E-09	3:49211989:C_T;3:49621994:C_T;3:49863483:C_T
CDHR4	3	49,828,165	49837268	4.04E-11	3:48941551:C_T;3:49860854:C_T;3:49890613:C_T;3:49621994:C_T;3:49863483:C_T
LAMB2	3	49,158,547	49170551	1.92E-11	3:49200137:G_T;3:49211989:C_T;3:49621994:C_T;3:49863483:C_T;3:48941551:C_T
MST1	3	49,721,380	49726934	7.76E-10	3:49860854:C_T;3:49863483:C_T;3:49899795:A_G;3:50070843:A_T;3:49621994:C_T
MST1R	3	49,924,435	49941299	7.32E-12	3:49860854:C_T;3:49890613:C_T;3:49899795:A_G;3:50209053:G_T;3:50218879:C_T
IP6K2	3	48,725,436	48777786	3.62E-11	3:49200137:G_T;3:49211989:C_T;3:49863483:C_T;3:48941551:C_T
RNF123	3	49,726,932	49758962	7.32E-12	3:48941551:C_T;3:49621994:C_T;3:49860854:C_T;3:49890613:C_T;3:49899795:A_G;3:50209053:G_T;3:50218879:C_T;3:50297330:A_G;3:49863483:C_T
SEMA3F	3	50,192,478	50226508	7.32E-12	3:49899795:A_G;3:50209053:G_T;3:50218879:C_T
CCDC71	3	49,199,968	49203754	1.92E-11	3:49200137:G_T;3:49211989:C_T;3:49621994:C_T
USP4	3	49,315,264	49378145	4.58E-09	3:49200137:G_T;3:49211989:C_T;3:49621994:C_T;3:48941551:C_T
IFRD2	3	50,325,163	50330349	7.32E-12	3:49860854:C_T;3:49890613:C_T;3:49899795:A_G;3:50070843:A_T;3:50209053:G_T;3:50218879:C_T;3:50297330:A_G
NICN1	3	49,460,379	49466759	1.92E-11	3:48941551:C_T;3:49211989:C_T;3:49621994:C_T;3:49863483:C_T;3:49890613:C_T
MON1A	3	49,946,302	49967606	1.05E-10	3:49890613:C_T;3:49899795:A_G;3:50209053:G_T;3:50070843:A_T
BSN	3	49,591,922	49708978	5.84E-10	3:49863483:C_T;3:49890613:C_T;3:49899795:A_G;3:49621994:C_T
IP6K1	3	49,761,727	49823975	8.49E-10	3:48941551:C_T;3:49621994:C_T;3:49860854:C_T;3:49890613:C_T
GNAI2	3	50,263,724	50296787	1.10E-08	3:50297330:A_G
PRKAR2A	3	48,782,030	48885279	1.24E-07	3:48941551:C_T
C3orf84	3	49,215,065	49229291	6.44E-09	3:49211989:C_T;3:49621994:C_T
SLC25A20	3	48,894,369	48936426	2.50E-07	3:48941551:C_T
HYAL2	3	50,355,221	50360337	3.97E-07	3:50297330:A_G
FOXP1	3	71,003,844	71633140	2.14E-08	3:71435955:A_G
HHLA2	3	108,015,376	108097132	2.28E-08	3:107946831:C_G;3:107955515:A_G
IFT57	3	107,879,659	107941417	2.28E-08	3:107946831:C_G;3:107955515:A_G
LSAMP	3	115,521,235	117716095	2.66E-12	3:117642005:A_C;3:117535656:C_T;3:117602144:C_T;3:117332915:A_G
PLCH1	3	155,093,369	155462856	3.46E-09	3:155353632:C_T;3:155432229:C_T
C3orf33	3	155,480,401	155524140	3.46E-09	3:155432229:C_T;3:155353632:C_T
MFSD1	3	158,449,987	158547508	2.13E-08	3:158522463:C_T
NLGN1	3	173,114,074	174004434	3.17E-13	3:173114513:C_G;3:173112907:C_T
CCDC39	3	180,320,646	180588793	4.57E-06	3:180785697:C_G
FXR1	3	180,585,929	180700541	5.91E-07	3:180785697:C_G
PRKG2	4	82,009,837	82136218	6.13E-10	4:82288564:A_G;4:82309913:C_T
MMRN1	4	90,800,683	90875780	1.52E-12	4:90596923:C_G;4:90628439:C_G;4:90757845:C_T;4:90832001:C_T;4:90933505:A_C;4:90820809:C_T
SNCA	4	90,645,250	90759466	5.43E-12	4:90628439:C_G;4:90757845:C_T;4:90832001:C_T;4:90933505:A_C
CCSER1	4	91,048,686	92523064	1.34E-07	4:90933505:A_C
BANK1	4	102,332,443	102995969	1.86E-11	4:102926923:A_G;4:103034391:A_G
SLC39A8	4	103,172,198	103352415	2.53E-16	4:102926923:A_G;4:103198082:A_G
PPA2	4	106,290,234	106395238	4.53E-13	4:106055212:C_T;4:106094427:A_G;4:106112676:G_T;4:106127121:C_T;4:106256521:A_C;4:106309224:A_G
TET2	4	106,067,032	106200973	5.73E-13	4:106112676:G_T;4:106309224:A_G;4:106094427:A_G;4:106127121:C_T;4:106256521:A_C
ARHGAP10	4	148,653,214	148993931	1.97E-08	4:148987430:A_G;4:149002841:C_T
NR3C2	4	148,999,913	149365850	2.75E-08	4:149002841:C_T
KIF2A	5	61,601,989	61833076	1.69E-09	5:61396472:A_G;5:61514611:C_T
RASGRF2	5	80,256,491	80525975	6.83E-09	5:80296433:G_T;5:80296487:A_G
TMEM161B	5	87,485,450	87565293	9.04E-16	5:87693561:C_T;5:87485064:A_G
KIAA0825	5	93,488,671	93954309	5.99E-08	5:92995477:A_C
FAM172A	5	92,953,775	93447404	1.60E-08	5:92995477:A_C
PAM	5	102,089,685	102366809	1.64E-10	5:102118385:C_T;5:102660400:C_T
C5orf30	5	102,594,403	102614361	6.20E-09	5:102660400:C_T
EFNA5	5	106,712,590	107006596	4.83E-10	5:106849674:A_G;5:106899684:A_G;5:106918329:A_G
FBXL17	5	107,194,736	107717799	1.12E-11	5:107209814:C_T;5:107234502:A_G
TGFBI	5	135,364,584	135399507	3.14E-07	5:135414893:C_T;5:135605017:A_C
TRPC7	5	135,548,999	135732730	4.19E-17	5:135605017:A_C;5:135608525:A_G;5:135646205:G_T;5:135653737:A_C
PCDH1	5	141,232,938	141258811	1.21E-10	5:141254063:A_C
GRIA1	5	152,869,175	153193429	7.96E-10	5:153093998:C_T;5:153095918:A_G;5:153222233:C_T
RNF130	5	179,338,651	179499118	2.21E-08	5:179511043:A_G
TRIM27	6	28,870,779	28891766	3.36E-08	6:29274356:A_T;6:29355113:C_T
OR2J2	6	29,141,311	29142351	9.12E-06	6:29274356:A_T
OR14J1	6	29,274,403	29275519	4.96E-08	6:29274356:A_T
OR5V1	6	29,323,007	29399744	3.36E-08	6:29274356:A_T;6:29355113:C_T
OR12D3	6	29,341,200	29343068	1.25E-06	6:29274356:A_T
TUBB	6	30,687,978	30693203	8.91E-10	6:30576781:C_G;6:30693900:C_T
PPP1R10	6	30,568,177	30586389	8.91E-10	6:30693900:C_T;6:30576781:C_G
ATAT1	6	30,594,619	30614600	1.32E-09	6:30693900:C_T;6:30576781:C_G
MSH5-SAPCD1	6	31,707,797	31732628	3.72E-07	6:31563228:A_C;6:31475127:A_G
ATP6V1G2-DDX39B	6	31,497,996	31514385	7.88E-10	6:31475127:A_G;6:31563228:A_C
CSNK2B	6	31,633,013	31638120	1.23E-08	6:31475127:A_G;6:31563228:A_C
DDAH2	6	31,694,815	31698394	7.88E-10	6:31563228:A_C;6:31475127:A_G
NCR3	6	31,556,672	31560762	7.88E-10	6:31563228:A_C;6:31475127:A_G
MICB	6	31,462,658	31478901	7.88E-10	6:31475127:A_G;6:31563228:A_C
MSH5	6	31,707,725	31732622	3.72E-07	6:31563228:A_C;6:31475127:A_G
ATP6V1G2	6	31,512,239	31516204	7.88E-10	6:31475127:A_G;6:31563228:A_C
PRRC2A	6	31,588,497	31605548	3.72E-07	6:31563228:A_C
BAG6	6	31,606,805	31620482	7.88E-10	6:31475127:A_G;6:31563228:A_C
DDX39B	6	31,497,996	31510225	7.88E-10	6:31475127:A_G;6:31563228:A_C
MCCD1	6	31,496,494	31498009	1.16E-09	6:31475127:A_G;6:31563228:A_C
NFKBIL1	6	31,514,647	31526606	1.16E-09	6:31475127:A_G;6:31563228:A_C
AIF1	6	31,582,961	31584798	1.16E-09	6:31475127:A_G;6:31563228:A_C
LY6G5B	6	31,637,944	31641553	1.23E-08	6:31475127:A_G;6:31563228:A_C
LY6G5C	6	31,644,461	31651817	3.72E-07	6:31563228:A_C
LEMD2	6	33,738,979	33756913	9.06E-21	6:33647058:C_T;6:33648997:A_G;6:33659536:A_G;6:33689534:A_G;6:33698461:C_T;6:33702079:C_T;6:33702869:C_T;6:33707599:C_T;6:33718418:C_T;6:33777432:C_T;6:33644033:C_T;6:33738314:C_T
UQCC2	6	33,662,070	33679504	4.68E-20	6:33647058:C_T;6:33702079:C_T;6:33707599:C_T;6:33718418:C_T;6:33738314:C_T;6:33777432:C_T;6:33540209:A_G;6:33648997:A_G;6:33659536:A_G;6:33689534:A_G;6:33702869:C_T
IP6K3	6	33,689,444	33714762	9.06E-21	6:33647058:C_T;6:33648997:A_G;6:33659536:A_G;6:33689534:A_G;6:33702079:C_T;6:33702869:C_T;6:33707599:C_T;6:33718418:C_T;6:33738314:C_T;6:33777432:C_T;6:33698461:C_T
ITPR3	6	33,588,142	33664351	9.06E-21	6:33455574:C_G;6:33540209:A_G;6:33606524:C_G;6:33644033:C_T;6:33647058:C_T;6:33648997:A_G;6:33659536:A_G;6:33689534:A_G;6:33698461:C_T;6:33702079:C_T;6:33702869:C_T;6:33707599:C_T;6:33718418:C_T;6:33738314:C_T;6:33777432:C_T
MLN	6	33,762,450	33771788	1.85E-19	6:33718418:C_T;6:33647058:C_T;6:33702079:C_T;6:33707599:C_T;6:33738314:C_T;6:33777432:C_T
BAK1	6	33,540,329	33548019	9.06E-21	6:33455574:C_G;6:33540209:A_G;6:33606524:C_G;6:33644033:C_T;6:33647058:C_T;6:33648997:A_G;6:33659536:A_G;6:33689534:A_G;6:33702079:C_T;6:33702869:C_T;6:33707599:C_T;6:33718418:C_T;6:33738314:C_T;6:33777432:C_T
KIFC1	6	33,359,313	33377701	1.50E-07	6:33455574:C_G
SYNGAP1	6	33,387,847	33421466	5.88E-08	6:33455574:C_G
UHRF1BP1	6	34,759,857	34850915	1.12E-08	6:34828553:C_T
C6orf106	6	34,555,065	34664636	1.12E-08	6:34828553:C_T
SNRPC	6	34,725,183	34741571	1.12E-08	6:34828553:C_T
MDGA1	6	37,600,284	37667082	4.04E-12	6:37631768:A_G;6:37650639:C_T;6:37660117:A_G
BTBD9	6	38,136,227	38607924	7.76E-18	6:38320913:C_T;6:38321782:C_T;6:38381108:C_T;6:38401926:C_T;6:38410739:C_T;6:38437538:A_G;6:38452503:C_T;6:38477642:C_T
GLO1	6	38,643,701	38670917	7.76E-18	6:38401926:C_T;6:38410739:C_T;6:38437538:A_G;6:38452503:C_T;6:38477642:C_T;6:38632703:C_G
FRS3	6	41,737,914	41754280	4.08E-08	6:41754370:C_T
PRICKLE4	6	41,748,087	41757879	4.08E-08	6:41754370:C_T
BYSL	6	41,888,926	41900784	4.08E-08	6:41754370:C_T
MED20	6	41,873,092	41888877	4.08E-08	6:41754370:C_T
CCND3	6	41,902,671	42018095	4.08E-08	6:41754370:C_T
USP49	6	41,757,634	41863099	4.36E-08	6:41754370:C_T
ASCC3	6	100,956,070	101329248	2.18E-11	6:101212001:A_T;6:100925828:C_T;6:100982169:C_T
SIM1	6	100,832,891	100912805	4.11E-10	6:100925828:C_T;6:101212001:A_T
LIN28B	6	105,404,923	105531207	3.65E-09	6:105400605:C_T
NKAIN2	6	124,125,286	125146803	9.51E-09	6:124292594:A_G
SAMD5	6	147,830,063	148058683	9.94E-10	6:147971725:A_C;6:147980909:A_G
PACRG	6	163,148,164	163736524	3.09E-09	6:163214327:A_G;6:163280204:C_T
PRKN	6	161,768,452	163148803	6.83E-09	6:163214327:A_G
MAD1L1	7	1,855,429	2272878	2.11E-08	7:1966841:C_T
SDK1	7	3,341,080	4308632	5.49E-10	7:3307861:C_T;7:3323848:C_T;7:3520024:A_G;7:3709491:G_T;7:3319635:A_G;7:3769198:A_G;7:3824141:A_T
NDUFA4	7	10,971,578	10979883	2.86E-08	7:10985188:A_G
PHF14	7	11,013,499	11209250	1.48E-07	7:10985188:A_G
DNAH11	7	21,582,833	21941457	1.10E-08	7:21687925:C_G
ZPBP	7	49,890,017	50160925	1.53E-08	7:49894349:A_G
VWC2	7	49,813,257	49961546	1.53E-08	7:49894349:A_G
PRKRIP1	7	102,004,319	102067123	4.31E-08	7:102008352:A_G
COG5	7	106,842,000	107204959	4.15E-08	7:106844694:C_T
HBP1	7	106,809,406	106842974	4.15E-08	7:106844694:C_T
DUS4L	7	107,203,929	107218906	6.40E-08	7:106844694:C_T
GPR22	7	107,110,463	107116098	6.40E-08	7:106844694:C_T
PRKAR2B	7	106,685,094	106802256	1.94E-07	7:106844694:C_T
C7orf66	7	108,524,032	108524644	9.68E-10	7:108532129:A_T
FOXP2	7	113,726,382	114333827	1.83E-16	7:114024179:A_G;7:114047542:C_G;7:113871993:A_T;7:114072443:A_G;7:114218582:C_T;7:114296102:C_T
KCND2	7	119,913,722	120390385	1.18E-06	7:119674508:A_G
CHCHD3	7	132,469,629	132766848	1.39E-10	7:132556835:C_G;7:132658084:A_C;7:132672192:G_T
SLC35B4	7	133,974,084	134001803	2.48E-09	7:133894515:C_G;7:133989882:C_T
DGKI	7	137,065,783	137531838	1.36E-08	7:137075847:A_T
MSRA	8	9,911,778	10286401	8.46E-11	8:10170037:G_T;8:10133477:A_G
PURG	8	30,853,321	30891231	1.32E-08	8:30849450:C_T
UNC5D	8	35,092,975	35654068	5.50E-09	8:35190619:A_C
TMEM64	8	91,634,223	91803860	1.34E-13	8:91599039:C_G;8:91669954:A_G;8:91650818:C_T
UBR5	8	103,265,240	103425069	3.30E-08	8:103356226:A_G
CSMD3	8	113,235,157	114449328	1.84E-08	8:114154187:G_T
TRPS1	8	116,420,724	116821899	3.37E-08	8:116657235:A_G
GLIS3	9	3,824,127	4348392	4.90E-09	9:4292083:A_G
PTPRD	9	8,314,246	10612723	1.95E-16	9:8827060:C_T;9:8829977:A_G;9:8830842:A_G;9:8834613:A_C;9:8858043:C_T
RORB	9	77,112,281	77308093	8.46E-09	9:77118987:C_T
FAM120AOS	9	96,208,776	96215874	2.12E-12	9:96218194:C_T;9:96361922:A_G;9:96392019:A_G;9:96392815:C_T
PHF2	9	96,338,689	96441869	2.12E-12	9:96218194:C_T;9:96361922:A_G;9:96392815:C_T;9:96392019:A_G
FAM120A	9	96,214,004	96328397	5.44E-12	9:96218194:C_T;9:96361922:A_G
ZBTB6	9	125,670,335	125675609	1.15E-10	9:125621610:C_G;9:125867350:C_T
RABGAP1	9	125,703,112	125867145	1.15E-10	9:125621610:C_G;9:125867350:C_T
RC3H2	9	125,606,835	125667620	1.15E-10	9:125621610:C_G;9:125867350:C_T
STRBP	9	125,871,779	126030855	1.48E-10	9:125621610:C_G;9:125867350:C_T
ZBTB26	9	125,677,845	125693779	1.48E-10	9:125621610:C_G;9:125867350:C_T
FIBCD1	9	133,777,825	133814673	3.05E-08	9:133786652:C_T
MED27	9	134,735,494	134955295	4.24E-09	9:134886837:A_G
QSOX2	9	139,098,179	139137687	3.71E-09	9:139109080:C_T
LHX3	9	139,088,096	139096955	1.02E-07	9:139109080:C_T
EXD3	9	140,201,348	140317714	6.53E-15	9:140265782:C_T;9:140241209:C_T
MLLT10	10	21,823,094	22032559	3.89E-10	10:21821918:A_T
SKIDA1	10	21,802,407	21814611	2.01E-09	10:21821918:A_T
CASC10	10	21,781,587	21786191	6.00E-08	10:21821918:A_T
DNAJC1	10	22,045,466	22292698	3.77E-08	10:21821918:A_T
ADO	10	64,564,516	64568238	2.51E-10	10:64519299:C_T;10:64552607:A_G;10:64588424:A_G
EGR2	10	64,571,756	64679660	1.02E-06	10:64588424:A_G
DUPD1	10	76,797,594	76818272	2.52E-08	10:76825638:A_T;10:76835828:C_T
DUSP13	10	76,854,192	76868979	2.52E-08	10:76825638:A_T;10:76835828:C_T
SAMD8	10	76,859,344	76941881	1.28E-07	10:76825638:A_T
C10orf11	10	77,360,998	78319925	6.70E-09	10:77771194:C_G
PLEKHA7	11	16,799,842	17035990	4.31E-09	11:17004090:C_G;11:17193475:A_T
NUCB2	11	17,229,700	17371521	3.16E-09	11:17115018:A_G;11:17193475:A_T
PIK3C2A	11	17,099,277	17229530	3.16E-09	11:17115018:A_G;11:17193475:A_T
RPS13	11	17,095,936	17099334	1.09E-08	11:17193475:A_T
CELF1	11	47,487,496	47587121	2.19E-11	11:47406592:C_T;11:47606483:A_G
PTPMT1	11	47,586,982	47595013	7.01E-13	11:47406592:C_T;11:47606483:A_G
NDUFS3	11	47,586,888	47606114	7.01E-13	11:47406592:C_T;11:47606483:A_G
AGBL2	11	47,681,143	47736941	2.19E-11	11:47406592:C_T;11:47606483:A_G
C1QTNF4	11	47,611,216	47616211	7.01E-13	11:47365199:A_G;11:47406592:C_T;11:47606483:A_G
NUP160	11	47,799,639	47870107	1.16E-10	11:47406592:C_T;11:47606483:A_G
FNBP4	11	47,738,072	47788995	7.01E-13	11:47365199:A_G;11:47406592:C_T;11:47606483:A_G
MTCH2	11	47,638,867	47664175	7.01E-13	11:47365199:A_G;11:47406592:C_T;11:47606483:A_G
FAM180B	11	47,608,198	47610746	7.01E-13	11:47365199:A_G;11:47606483:A_G;11:47406592:C_T
MYBPC3	11	47,352,957	47374253	7.01E-13	11:47365199:A_G;11:47406592:C_T;11:47606483:A_G
ACP2	11	47,260,853	47270457	8.92E-12	11:47365199:A_G;11:47606483:A_G
PSMC3	11	47,440,320	47447993	7.01E-13	11:47365199:A_G;11:47406592:C_T;11:47606483:A_G
RAPSN	11	47,459,308	47470730	7.01E-13	11:47365199:A_G;11:47406592:C_T;11:47606483:A_G
MADD	11	47,290,712	47351582	7.01E-13	11:47365199:A_G;11:47606483:A_G
SLC39A13	11	47,428,683	47438047	1.55E-11	11:47365199:A_G;11:47606483:A_G
SPI1	11	47,376,411	47400127	8.92E-12	11:47365199:A_G;11:47606483:A_G
CLP1	11	57,416,465	57429340	4.49E-10	11:57404779:A_G;11:57667222:C_T
MED19	11	57,471,186	57479693	4.49E-10	11:57404779:A_G;11:57667222:C_T
ZDHHC5	11	57,435,219	57468659	4.49E-10	11:57404779:A_G;11:57667222:C_T
TMX2	11	57,480,072	57508445	4.49E-10	11:57404779:A_G;11:57667222:C_T
SERPING1	11	57,364,860	57382326	2.63E-09	11:57404779:A_G;11:57667222:C_T
TMX2-CTNND1	11	57,480,077	57559058	1.13E-08	11:57404779:A_G;11:57667222:C_T
CTNND1	11	57,520,715	57587018	1.08E-08	11:57404779:A_G;11:57667222:C_T
C11orf31	11	57,508,825	57510986	1.86E-08	11:57404779:A_G;11:57667222:C_T
SLC3A2	11	62,623,518	62656352	1.24E-07	11:62697813:G_T
SLC22A6	11	62,703,857	62752455	6.41E-07	11:62697813:G_T
CCDC87	11	66,357,640	66360554	1.18E-10	11:66328095:C_T;11:66328741:A_C;11:66401373:G_T;11:66274958:A_C
CTSF	11	66,330,934	66336312	1.18E-10	11:66328741:A_C;11:66274958:A_C;11:66328095:C_T;11:66401373:G_T
CCS	11	66,360,292	66373490	1.18E-10	11:66328095:C_T;11:66328741:A_C;11:66401373:G_T;11:66274958:A_C
RBM14-RBM4	11	66,384,097	66413940	1.18E-10	11:66328095:C_T;11:66328741:A_C;11:66401373:G_T;11:66274958:A_C
RBM14	11	66,384,053	66394818	5.50E-09	11:66328095:C_T;11:66328741:A_C;11:66401373:G_T
NPAS4	11	66,188,475	66194178	3.05E-09	11:66328741:A_C;11:66650501:A_G;11:66274958:A_C
RBM4	11	66,384,097	66434153	1.18E-10	11:66328095:C_T;11:66328741:A_C;11:66401373:G_T;11:66274958:A_C
RBM4B	11	66,432,469	66445392	9.20E-10	11:65969091:C_T;11:66058082:G_T;11:66274958:A_C;11:66328095:C_T;11:66328741:A_C;11:66401373:G_T;11:66650501:A_G
DPP3	11	66,247,484	66277130	1.18E-10	11:66274958:A_C;11:66328095:C_T;11:66328741:A_C;11:66401373:G_T
PELI3	11	66,234,216	66244808	1.18E-10	11:66041079:A_G;11:66058082:G_T;11:66274958:A_C;11:66328095:C_T;11:66328741:A_C;11:66401373:G_T
ZDHHC24	11	66,288,108	66313709	1.18E-10	11:66274958:A_C;11:66328095:C_T;11:66328741:A_C;11:66401373:G_T
PC	11	66,615,704	66725847	1.18E-10	11:66328095:C_T;11:66328741:A_C;11:66401373:G_T;11:66650501:A_G
PACS1	11	65,837,834	66012218	1.48E-12	11:66041079:A_G;11:66058082:G_T;11:65969091:C_T
BBS1	11	66,278,077	66301098	1.18E-10	11:66274958:A_C;11:66328095:C_T;11:66328741:A_C;11:66401373:G_T
KLC2	11	66,024,765	66035331	7.62E-10	11:66041079:A_G;11:66058082:G_T;11:66274958:A_C;11:66328741:A_C
MRPL11	11	66,202,546	66234209	3.39E-07	11:66328095:C_T;11:66274958:A_C
CNIH2	11	66,045,661	66052772	1.50E-12	11:66041079:A_G
SPTBN2	11	66,452,719	66496697	6.83E-09	11:66328095:C_T;11:66328741:A_C;11:66401373:G_T
ARAP1	11	72,396,114	72504644	5.59E-12	11:72323888:G_T;11:72341342:A_G;11:72348039:A_G;11:72394706:A_G
PDE2A	11	72,287,185	72385635	5.59E-12	11:72323888:G_T;11:72340686:C_G;11:72341342:A_G;11:72348039:A_G;11:72394706:A_G
DNAJB13	11	73,661,364	73681411	8.09E-09	11:73455292:A_C
MRPL48	11	73,498,361	73576178	8.09E-09	11:73455292:A_C
PLEKHB1	11	73,357,223	73373864	9.76E-08	11:73455292:A_C
RAB6A	11	73,386,683	73472182	8.09E-09	11:73455292:A_C
PAAF1	11	73,587,744	73638790	8.09E-09	11:73455292:A_C
COA4	11	73,583,712	73588033	6.37E-06	11:73455292:A_C
DLG2	11	83,166,055	85338966	2.26E-08	11:83277325:C_T
TYR	11	88,910,620	89028927	2.00E-07	11:89029931:C_T
GRM5	11	88,237,744	88799113	2.00E-09	11:88598444:C_G;11:88756779:C_T
CNTN5	11	98,891,683	100229616	4.70E-09	11:99068364:A_G;11:99126016:A_G
KMT2A	11	118,307,205	118397539	4.96E-09	11:118396331:A_T
COPS7A	12	6,832,907	6841041	5.37E-11	12:6873818:A_G
MLF2	12	6,857,170	6876641	5.37E-11	12:6873818:A_G
LAG3	12	6,881,678	6887621	5.67E-07	12:6873818:A_G
PTMS	12	6,874,682	6880116	5.67E-07	12:6873818:A_G
NAB2	12	57,482,677	57489259	1.61E-09	12:57273289:A_G;12:57487814:A_C
STAT6	12	57,489,191	57525922	1.61E-09	12:57273289:A_G;12:57487814:A_C
MYO1A	12	57,422,301	57444982	6.80E-08	12:57487814:A_C
HMGA2	12	66,217,911	66360075	3.16E-11	12:66376091:C_T
KCTD10	12	109,886,461	109915349	1.51E-08	12:109982578:A_T
UBE3B	12	109,915,207	109974507	1.51E-08	12:109982578:A_T
MYO1H	12	109,785,708	109893328	1.51E-08	12:109982578:A_T
MMAB	12	109,991,542	110011679	1.51E-08	12:109982578:A_T
MVK	12	110,011,060	110035067	1.51E-08	12:109982578:A_T
KSR2	12	117,890,817	118406788	6.47E-10	12:118385788:G_T;12:118399491:A_T;12:118403547:C_T;12:118414697:A_G
ABCB9	12	123,405,498	123466196	1.74E-13	12:123600086:C_G;12:123856998:A_G;12:123404966:A_C;12:123558705:C_T
PITPNM2	12	123,468,027	123634562	1.74E-13	12:123558705:C_T;12:123600086:C_G;12:123856998:A_G;12:123404966:A_C
OGFOD2	12	123,459,127	123464590	1.74E-13	12:123600086:C_G;12:123856998:A_G;12:123404966:A_C;12:123558705:C_T
CDK2AP1	12	123,745,528	123756881	1.74E-13	12:123558705:C_T;12:123600086:C_G;12:123856998:A_G;12:123404966:A_C
C12orf65	12	123,717,463	123742506	1.74E-13	12:123558705:C_T;12:123600086:C_G;12:123856998:A_G
MPHOSPH9	12	123,636,867	123728561	1.74E-13	12:123558705:C_T;12:123600086:C_G;12:123856998:A_G
RILPL2	12	123,899,936	123921264	5.76E-13	12:123600086:C_G;12:123856998:A_G
SETD8	12	123,868,320	123893905	1.74E-13	12:123558705:C_T;12:123600086:C_G;12:123856998:A_G
SBNO1	12	123,773,656	123849390	1.74E-13	12:123600086:C_G;12:123856998:A_G
OLFM4	13	53,602,894	53626192	3.66E-28	13:53608951:G_T;13:53635837:G_T;13:53643370:A_C;13:53646726:C_T;13:53752731:A_T;13:53817443:C_T;13:53857542:C_T;13:53888526:A_T;13:53613990:A_G;13:53792827:A_T
DIAPH3	13	60,239,717	60738121	1.38E-10	13:60362013:A_G;13:60532796:C_T;13:60670489:A_G
PCDH9	13	66,876,967	67804468	1.40E-09	13:66947124:A_T
HS6ST3	13	96,743,093	97485671	2.03E-10	13:96922716:C_T;13:96932868:A_C;13:97048568:G_T
TEX29	13	111,968,531	111996596	6.04E-09	13:111982291:C_T
NPAS3	14	33,404,139	34273382	7.33E-13	14:33381862:A_G;14:33420086:A_C;14:33412996:A_G;14:33420212:A_G
RASGRP1	15	38,780,304	38857776	4.42E-13	15:38897857:C_T;15:38899190:C_T;15:38846678:C_T;15:38867914:C_T
TCF12	15	57,210,821	57591479	7.85E-12	15:57215867:A_G
ZNF280D	15	56,922,379	57210769	6.69E-11	15:57215867:A_G
DIS3L	15	66,585,555	66626236	1.80E-08	15:66709386:C_G
TIPIN	15	66,628,544	66679084	1.80E-08	15:66709386:C_G
ZWILCH	15	66,797,297	66842115	2.20E-08	15:66709386:C_G
MAP2K1	15	66,679,155	66784650	1.80E-08	15:66709386:C_G
SNAPC5	15	66,782,473	66790151	2.20E-08	15:66709386:C_G
RPL4	15	66,790,355	66816870	3.51E-08	15:66709386:C_G
C15orf59	15	74,032,141	74045088	2.47E-10	15:74012409:C_T;15:74052756:C_T
PML	15	74,287,014	74340153	2.97E-08	15:74282343:C_T;15:74331659:A_C
STOML1	15	74,275,547	74286963	9.28E-10	15:74052756:C_T;15:74282343:C_T;15:74331659:A_C
FES	15	91,426,925	91439006	6.78E-16	15:91420973:C_T;15:91426560:A_G
FURIN	15	91,411,822	91426688	6.78E-16	15:91420973:C_T;15:91426560:A_G
IGF1R	15	99,192,200	99507759	5.19E-09	15:99183876:C_T;15:99202875:C_T
CCDC78	16	772,582	776954	9.73E-10	16:715164:A_G;16:757891:C_T;16:777129:A_G
WDR90	16	699,311	717833	9.73E-10	16:715164:A_G;16:757891:C_T;16:777129:A_G
NARFL	16	779,753	791329	9.73E-10	16:715164:A_G;16:757891:C_T;16:777129:A_G
FAM173A	16	770,581	772601	9.73E-10	16:715164:A_G;16:757891:C_T;16:777129:A_G
HAGHL	16	776,936	785525	9.73E-10	16:715164:A_G;16:757891:C_T;16:777129:A_G
RHOT2	16	718,086	724174	9.73E-10	16:715164:A_G;16:757891:C_T;16:777129:A_G
C16orf72	16	9,185,505	9215497	1.93E-08	16:9191790:C_T
SNX29	16	12,070,594	12668146	8.68E-12	16:12290645:A_T;16:12323509:C_G;16:12351998:A_G;16:12441085:A_G;16:12447921:A_C
IQCK	16	19,727,778	19868907	2.18E-12	16:19876092:C_T;16:19904344:A_T
GPRC5B	16	19,868,616	19897489	3.10E-12	16:19904344:A_T;16:19876092:C_T
GPR139	16	20,042,807	20085239	2.30E-09	16:20006745:C_G;16:20059843:A_T
TMEM219	16	29,952,206	29984373	6.32E-09	16:29978827:A_G
INO80E	16	30,006,615	30017114	6.32E-09	16:29978827:A_G
PPP4C	16	30,087,299	30096698	6.32E-09	16:29978827:A_G
GDPD3	16	30,116,131	30125177	6.32E-09	16:29978827:A_G
FAM57B	16	30,035,748	30064299	6.32E-09	16:29978827:A_G
DOC2A	16	30,016,830	30034591	6.32E-09	16:29978827:A_G
ALDOA	16	30,064,411	30081778	6.56E-08	16:29978827:A_G
TAOK2	16	29,984,962	30003582	7.43E-09	16:29978827:A_G
SALL1	16	51,169,886	51185278	2.51E-14	16:51177517:A_G
TOX3	16	52,471,917	52581714	1.23E-06	16:52637892:A_T
GNAO1	16	56,225,302	56391356	1.11E-12	16:56090503:C_T;16:56128782:C_T;16:56146367:A_G;16:56347472:G_T;16:56352854:A_C;16:56357745:G_T;16:56361557:C_T
CDH8	16	61,681,146	62070939	1.90E-08	16:61647589:C_T
SYCE1L	16	77,233,294	77247112	3.75E-16	16:77049257:A_G;16:77137324:A_C;16:77146708:A_G;16:77157265:A_G;16:77168250:A_T;16:77180562:C_T;16:77211918:A_G;16:77237715:C_G
MON1B	16	77,224,732	77236302	3.75E-16	16:77049257:A_G;16:77137324:A_C;16:77146708:A_G;16:77157265:A_G;16:77168250:A_T;16:77180562:C_T;16:77211918:A_G;16:77237715:C_G
MNT	17	2,287,354	2304412	2.84E-09	17:2294048:A_C;17:2312842:A_G
SGSM2	17	2,240,792	2284352	1.76E-09	17:2294048:A_C;17:2312842:A_G;17:2243628:C_T
METTL16	17	2,308,856	2415185	1.18E-09	17:2243628:C_T;17:2312842:A_G;17:2400876:C_T
SPAG5	17	26,904,588	26926297	1.98E-08	17:26933741:C_G
FLOT2	17	27,206,353	27224697	2.17E-06	17:26933741:C_G
HEXIM1	17	43,224,684	43229468	9.04E-13	17:43156135:A_T;17:43216281:C_T;17:43236109:C_T;17:43244700:A_C
PLCD3	17	43,186,335	43210721	5.09E-13	17:43156135:A_T;17:43157709:A_G;17:43176632:A_C;17:43192821:A_G;17:43195981:C_T;17:43216281:C_T;17:43236109:C_T;17:43244700:A_C
HEXIM2	17	43,238,067	43247407	5.47E-13	17:43156135:A_T;17:43176632:A_C;17:43216281:C_T;17:43236109:C_T;17:43244700:A_C
NMT1	17	43,128,978	43186384	5.09E-13	17:43156135:A_T;17:43157709:A_G;17:43176632:A_C;17:43192821:A_G;17:43195981:C_T;17:43216281:C_T;17:43236109:C_T;17:43244700:A_C
ACBD4	17	43,209,967	43221548	5.47E-13	17:43156135:A_T;17:43195981:C_T;17:43216281:C_T;17:43244700:A_C
DCAKD	17	43,100,708	43138473	5.09E-13	17:43156135:A_T;17:43157709:A_G;17:43176632:A_C;17:43192821:A_G;17:43195981:C_T;17:43216281:C_T;17:43236109:C_T;17:43244700:A_C
HOXB2	17	46,618,256	46623441	1.23E-08	17:46035001:C_G;17:46563707:G_T;17:47012551:C_G
COPZ2	17	46,103,533	46115392	1.23E-08	17:46035001:C_G
PNPO	17	46,018,872	46025654	1.23E-08	17:46035001:C_G;17:46563707:G_T
UBE2Z	17	46,985,731	47006418	1.58E-10	17:46035001:C_G;17:47060322:A_C;17:47123423:C_T;17:47012551:C_G;17:47028472:A_G
CBX1	17	46,147,414	46178883	1.43E-08	17:46035001:C_G
HOXB1	17	46,605,888	46608359	1.23E-08	17:46035001:C_G;17:46563707:G_T
SNF8	17	47,006,678	47022479	1.58E-10	17:47012551:C_G;17:47028472:A_G;17:47060322:A_C;17:47123423:C_T
TTLL6	17	46,839,597	46894576	2.38E-09	17:46563707:G_T;17:47012551:C_G;17:47028472:A_G
SNX11	17	46,180,719	46200436	1.23E-08	17:46035001:C_G
SKAP1	17	46,210,802	46507637	2.09E-08	17:46035001:C_G;17:46563707:G_T
CALCOCO2	17	46,908,350	46943884	2.14E-07	17:47012551:C_G
IGF2BP1	17	47,074,774	47133012	1.58E-10	17:47060322:A_C;17:47123423:C_T
GIP	17	47,035,916	47045958	2.85E-09	17:47012551:C_G;17:47028472:A_G
CA10	17	49,707,674	50237377	2.45E-10	17:50259142:A_C;17:50303220:C_T
CYB561	17	61,509,665	61523739	2.75E-10	17:61024696:C_T;17:61201358:A_G
TANC2	17	61,086,917	61505060	4.36E-10	17:61024696:C_T;17:61201358:A_G
ASXL3	18	31,158,579	31331156	2.13E-09	18:31313965:G_T;18:31285269:A_C
DCC	18	49,866,542	51057784	8.54E-11	18:50379032:A_G;18:50444281:A_G;18:50543302:A_G;18:50724899:A_G;18:50748499:A_G;18:50836953:C_T
TCF4	18	52,889,562	53332018	1.59E-12	18:52889067:A_G;18:52906830:G_T;18:52968200:A_C;18:52982458:C_T;18:53057188:A_G
SEC11C	18	56,806,709	56826068	4.54E-08	18:56824041:A_C
KDM4B	19	4,969,125	5153606	1.07E-11	19:4991417:G_T;19:5036564:A_G;19:5073447:A_G;19:5088927:A_G;19:5132708:C_T
APOC1	19	45,417,504	45422606	5.18E-07	19:45411941:C_T
APOE	19	45,409,011	45412650	2.13E-08	19:45411941:C_T
ZNF865	19	56,116,771	56128635	9.62E-07	19:56134038:C_T
ZNF784	19	56,132,108	56135967	1.41E-11	19:56170415:C_T;19:56215184:A_G;19:56134038:C_T
CCDC106	19	56,152,428	56164527	5.23E-09	19:56170415:C_T;19:56215184:A_G
NLRP9	19	56,219,798	56249768	1.42E-11	19:56170415:C_T;19:56215184:A_G;19:56217261:G_T
ZNF580	19	56,146,382	56154835	1.41E-11	19:56134038:C_T;19:56170415:C_T;19:56215184:A_G;19:56217261:G_T
ZNF581	19	56,146,825	56156988	1.41E-11	19:56134038:C_T;19:56170415:C_T;19:56215184:A_G;19:56217261:G_T
U2AF2	19	56,165,512	56186081	1.42E-11	19:56170415:C_T;19:56215184:A_G
EPN1	19	56,186,592	56221224	3.17E-10	19:56170415:C_T;19:56215184:A_G;19:56217261:G_T
ASXL1	20	30,946,155	31027122	2.32E-20	20:30695145:G_T;20:30725648:A_G;20:31046567:A_C;20:31099311:C_T;20:31102309:A_G;20:31163914:C_G;20:31187504:C_G
POFUT1	20	30,795,683	30826470	2.95E-15	20:30695145:G_T;20:30725648:A_G;20:31046567:A_C;20:31099311:C_T
PLAGL2	20	30,780,306	30795594	9.28E-16	20:30695145:G_T;20:30725648:A_G;20:31046567:A_C;20:31099311:C_T;20:30675676:A_G
KIF3B	20	30,865,467	30922814	9.34E-19	20:30695145:G_T;20:30725648:A_G;20:31046567:A_C;20:31099311:C_T;20:31102309:A_G;20:31163914:C_G
NOL4L	20	31,030,862	31172876	2.32E-20	20:30695145:G_T;20:30725648:A_G;20:31046567:A_C;20:31099311:C_T;20:31102309:A_G;20:31163914:C_G;20:31187504:C_G
RP11-410N8.4	20	31,175,281	31196695	2.32E-20	20:31102309:A_G;20:31163914:C_G;20:31187504:C_G
TM9SF4	20	30,697,309	30755061	9.28E-16	20:30695145:G_T;20:30725648:A_G;20:31046567:A_C;20:31099311:C_T
HCK	20	30,639,991	30689659	2.10E-09	20:30675676:A_G
EYA2	20	45,523,263	45817492	1.15E-07	20:45841052:A_G
ZMYND8	20	45,837,859	45985567	1.63E-08	20:45841052:A_G
CSE1L	20	47,662,849	47713489	6.47E-10	20:47774512:C_T
STAU1	20	47,729,878	47804904	6.47E-10	20:47774512:C_T
ARFGEF2	20	47,538,427	47653230	6.47E-10	20:47774512:C_T
ZNFX1	20	47,854,483	47894963	6.47E-10	20:47774512:C_T
ZNF512B	20	62,588,055	62680113	2.73E-08	20:62670427:G_T
ADARB1	21	46,493,768	46646478	7.65E-09	21:46539725:A_G
PRED57	21	46,511,596	46515493	1.64E-08	21:46539725:A_G
EP300	22	41,487,790	41576081	1.82E-09	22:41432389:C_G;22:41496800:A_G;22:41753603:A_G
RANGAP1	22	41,641,615	41682255	3.81E-09	22:41432389:C_G;22:41496800:A_G;22:41753603:A_G
TEF	22	41,763,337	41795330	1.82E-09	22:41432389:C_G;22:41496800:A_G;22:41753603:A_G
L3MBTL2	22	41,601,209	41627275	1.82E-09	22:41432389:C_G;22:41496800:A_G;22:41753603:A_G
CHADL	22	41,625,517	41636938	1.20E-08	22:41496800:A_G;22:41753603:A_G
ZC3H7B	22	41,697,526	41756151	3.81E-09	22:41496800:A_G;22:41753603:A_G
CNKSR2	23	21,392,536	21672813	4.61E-09	X:21494390:A_G
LRGUK	7	133,812,052	133949343	1.80E-10	7:132556835:C_G;7:132658084:A_C;7:132672192:G_T;7:133989882:C_T;7:133894515:C_G
MEIS1	2	66,660,584	66801001	1.56E-51	2:66726568:C_T;2:66766964:C_T;2:66789341:C_G;2:67022234:A_G;2:68071990:C_G;2:66677816:C_G;2:66730783:A_G;2:66750564:G_T;2:66777521:A_G;2:66792109:A_G;2:66792291:C_T
