# Supplementary material for: Effects of Insomnia on Peptic Ulcer Disease Using Mendelian Randomization
Source: Oxid Med Cell Longev. 2021 Sep 25;2021:2216314. doi: 10.1155/2021/2216314 (PMC8487841; doi:10.1155/2021/2216314)
Supplement: Supplementary Materials — Supplementary Table 1: insomnia-associated SNPs. Supplementary Table 2: position mapping genes. Supplementary Table 3: eQTL mapping genes. Supplementary Table 4: chromatin interaction mapping genes. [file 2216314.f1.zip › 2216314.f3.txt]

Gene	Chr	Start Bp	End Bp	GWAS P	SNPs	eQTL min P	eQTL tissue
DAB1	1	57460451	59012406	5.14E-09	1:57819204:A_G;1:57849697:C_T;1:57850914:A_C;1:57859402:A_G	0.000000059	Brain_Cerebellum
NEGR1	1	71861623	72748417	2.27E-14	1:72619961:A_C;1:72729142:A_G;1:72764289:C_T;1:72939855:A_C;1:73735403:C_G;1:72635996:A_C;1:72825144:A_T;1:72904288:A_G;1:72747844:C_T	2.73E-54	Whole_Blood:BIOS_eQTL_geneLevel
PTBP2	1	97187221	97289294	8.16E-09	1:96961268:A_T	1.19E-13	Cells_Transformed_fibroblasts:BIOS_eQTL_geneLevel
MAN1A2	1	117910071	118071494	0.000000006	1:117944435:C_T	6.25E-82	Esophagus_Mucosa:Muscle_Skeletal:Cells_Transformed_fibroblasts:Skin_Not_Sun_Exposed_Suprapubic:Skin_Sun_Exposed_Lower_leg:BIOS_eQTL_geneLevel
KLHL20	1	173684080	173755840	1.23E-08	1:173878862:C_T	3E-19	BIOS_eQTL_geneLevel
SERPINC1	1	173872947	173886516	1.23E-08	1:173878862:C_T	5.21E-40	Adipose_Subcutaneous:Adipose_Visceral_Omentum:Artery_Tibial:Esophagus_Muscularis:Lung:Muscle_Skeletal:Nerve_Tibial:Cells_Transformed_fibroblasts:Skin_Sun_Exposed_Lower_leg:BIOS_eQTL_geneLevel
DARS2	1	173793641	173827684	1.23E-08	1:173878862:C_T	1.02E-20	Adipose_Subcutaneous:Artery_Tibial:Esophagus_Muscularis:Heart_Atrial_Appendage:Heart_Left_Ventricle:Muscle_Skeletal:BIOS_eQTL_geneLevel
RC3H1	1	173900352	173991435	1.23E-08	1:173878862:C_T	0.000000115	Brain_Cerebellum:Brain_Cortex:Esophagus_Muscularis:Nerve_Tibial:Cells_Transformed_fibroblasts:Thyroid
SLC9C2	1	173469603	173572233	1.23E-08	1:173878862:C_T	0.00000135	Brain_Anterior_cingulate_cortex_BA24:Testis:Thyroid
ANKRD45	1	173578700	173639001	1.23E-08	1:173878862:C_T	3.76E-16	Cells_Transformed_fibroblasts:Skin_Sun_Exposed_Lower_leg:Testis
PRDX6	1	173446405	173457946	1.83E-08	1:173878862:C_T	3.08E-24	BIOS_eQTL_geneLevel
RABGAP1L	1	174128548	174964445	1.23E-08	1:173878862:C_T	2.87E-12	Adipose_Subcutaneous:Breast_Mammary_Tissue:Esophagus_Muscularis:Lung:Cells_Transformed_fibroblasts:Skin_Sun_Exposed_Lower_leg:Testis
BRINP3	1	190066792	190446759	9.26E-12	1:190371291:A_G;1:190060095:A_G;1:190129396:C_T;1:190136798:A_G	0.00000322	Heart_Atrial_Appendage:Nerve_Tibial
SHISA4	1	201857808	201861434	0.000000091	1:201765094:C_T	5.58E-10	Nerve_Tibial:Cells_Transformed_fibroblasts
NAV1	1	201592411	201796102	0.00000126	1:201765094:C_T	0.0000142	BIOS_eQTL_geneLevel
DIEXF	1	210001352	210030910	1.68E-08	1:210293333:C_T	1.5E-19	BIOS_eQTL_geneLevel
IRF6	1	209959036	209979465	1.68E-08	1:210293333:C_T	5.21E-22	BIOS_eQTL_geneLevel
TRAF3IP3	1	209929377	209955668	6.25E-08	1:210293333:C_T	0.00000329	BIOS_eQTL_geneLevel
MTA3	2	42721709	42984087	1.82E-09	2:42813247:G_T;2:43110476:C_G	0.00000858	Thyroid
OXER1	2	42989642	42991401	1.82E-09	2:42813247:G_T;2:43110476:C_G	4.67E-17	Artery_Aorta:Artery_Tibial:Nerve_Tibial:Pancreas:Pituitary:BIOS_eQTL_geneLevel
HAAO	2	42994229	43019733	1.82E-09	2:42813247:G_T;2:43110476:C_G	6.52E-74	Brain_Caudate_basal_ganglia:Brain_Hippocampus:Brain_Hypothalamus:Brain_Nucleus_accumbens_basal_ganglia:Brain_Putamen_basal_ganglia:Esophagus_Mucosa:Esophagus_Muscularis:Heart_Left_Ventricle:Nerve_Tibial:Pancreas:Pituitary:Skin_Sun_Exposed_Lower_leg:Thyroid:BIOS_eQTL_geneLevel
EML4	2	42396490	42559688	7.77E-09	2:42813247:G_T	2.46E-08	Testis:Thyroid
COX7A2L	2	42560686	42652228	1.82E-09	2:42813247:G_T;2:43110476:C_G	2.15E-10	Adipose_Subcutaneous:Esophagus_Mucosa:Skin_Not_Sun_Exposed_Suprapubic:Skin_Sun_Exposed_Lower_leg:Stomach:Testis:Thyroid:BIOS_eQTL_geneLevel
LRPPRC	2	44113647	44223144	2.69E-10	2:44262449:C_T	3.23E-52	Adipose_Subcutaneous:Cells_EBV-transformed_lymphocytes:Whole_Blood:Artery_Aorta:Artery_Tibial:Brain_Caudate_basal_ganglia:Brain_Cerebellar_Hemisphere:Brain_Cerebellum:Brain_Cortex:Brain_Frontal_Cortex_BA9:Brain_Hippocampus:Brain_Nucleus_accumbens_basal_ganglia:Brain_Putamen_basal_ganglia:Breast_Mammary_Tissue:Colon_Sigmoid:Esophagus_Mucosa:Esophagus_Muscularis:Heart_Atrial_Appendage:Heart_Left_Ve…
CBWD2	2	114195268	114253766	1.2E-19	2:114082175:A_G;2:114099305:G_T	1.1E-13	Thyroid
FOXD4L1	2	114256661	114258728	1.2E-19	2:114082175:A_G	0.000000133	Thyroid
PSD4	2	113914902	113966973	1.2E-19	2:114082175:A_G;2:114099305:G_T	1.8E-17	BIOS_eQTL_geneLevel
PAX8	2	113973574	114036527	7.51E-17	2:114082175:A_G	0.000000393	BIOS_eQTL_geneLevel
PKP4	2	159313476	159539391	3.27E-10	2:159137557:C_T	2.56E-27	BIOS_eQTL_geneLevel
LY75-CD302	2	160628362	160761221	4.95E-09	2:160415477:C_T;2:160570033:C_T	4E-80	BIOS_eQTL_geneLevel
BAZ2B	2	160175490	160473203	4.95E-09	2:160415477:C_T;2:160570033:C_T	2.54E-87	BIOS_eQTL_geneLevel
LY75	2	160628362	160761260	4.95E-09	2:160415477:C_T;2:160570033:C_T	4E-80	Adipose_Subcutaneous:Adipose_Visceral_Omentum:Whole_Blood:Artery_Aorta:Artery_Tibial:Breast_Mammary_Tissue:Esophagus_Mucosa:Esophagus_Muscularis:Lung:Muscle_Skeletal:Nerve_Tibial:Cells_Transformed_fibroblasts:Skin_Not_Sun_Exposed_Suprapubic:Skin_Sun_Exposed_Lower_leg:Thyroid:BIOS_eQTL_geneLevel
WDSUB1	2	160092304	160143310	0.00000069	2:160415477:C_T	0.000000578	BIOS_eQTL_geneLevel
ITGB6	2	160956177	161128399	4.95E-09	2:160415477:C_T;2:160570033:C_T	0.00000185	Adipose_Subcutaneous
CD302	2	160625364	160654753	4.95E-09	2:160415477:C_T;2:160570033:C_T	5.82E-15	BIOS_eQTL_geneLevel
ATP5G3	2	176040986	176049335	1.54E-08	2:176473295:A_G	0.00000278	Esophagus_Muscularis:Testis
PLCL1	2	198669426	199437305	6.41E-10	2:198438425:C_T;2:198950240:A_G;2:198735712:A_G	1E-171	Whole_Blood:Thyroid:BIOS_eQTL_geneLevel
HSPE1	2	198364718	198368181	3.74E-08	2:198438425:C_T;2:198950240:A_G	0.00000352	BIOS_eQTL_geneLevel
RFTN2	2	198432948	198540769	6.41E-10	2:198438425:C_T;2:198735712:A_G;2:198950240:A_G	3.64E-10	Adipose_Subcutaneous:Lung:Muscle_Skeletal:Spleen:Thyroid
SF3B1	2	198254508	198299815	3.29E-08	2:198438425:C_T;2:198735712:A_G;2:198950240:A_G	3.37E-12	Nerve_Tibial:Testis:BIOS_eQTL_geneLevel
ANKRD44	2	197831741	198175897	3.02E-08	2:198438425:C_T;2:198735712:A_G;2:198950240:A_G	7.63E-74	Skin_Sun_Exposed_Lower_leg:Testis:BIOS_eQTL_geneLevel
MARS2	2	198570087	198573113	3.02E-08	2:198438425:C_T;2:198735712:A_G;2:198950240:A_G	2.95E-17	Skin_Sun_Exposed_Lower_leg:BIOS_eQTL_geneLevel
KLF7	2	207938861	208031991	4.82E-11	2:208042581:A_C	1.24E-18	Testis:BIOS_eQTL_geneLevel
MAP2	2	210288782	210598842	2.39E-08	2:210380152:G_T	4.64E-12	Esophagus_Muscularis:BIOS_eQTL_geneLevel
TRAF3IP1	2	239229082	239309541	4.64E-09	2:239222376:C_G;2:239231477:C_T	0.000000211	BIOS_eQTL_geneLevel
AC016757.3	2	239133193	239140318	4.64E-09	2:239222376:C_G;2:239231477:C_T	1.77E-38	Adipose_Subcutaneous:Whole_Blood:Artery_Tibial:Breast_Mammary_Tissue:Heart_Atrial_Appendage:Lung:Cells_Transformed_fibroblasts:Vagina:BIOS_eQTL_geneLevel
KLHL30	2	239047363	239061588	0.000000005	2:239231477:C_T	1.34E-12	BIOS_eQTL_geneLevel
ASB1	2	239335383	239360891	4.64E-09	2:239222376:C_G;2:239231477:C_T	2.43E-39	BIOS_eQTL_geneLevel
HES6	2	239146908	239149303	0.000000005	2:239222376:C_G;2:239231477:C_T	0.00000117	Muscle_Skeletal:BIOS_eQTL_geneLevel
ATP2B2	3	10365707	10749716	5.35E-11	3:10581380:C_T;3:10623367:C_T;3:10608121:C_T	0.00000151	Nerve_Tibial
FAM198A	3	43020759	43101703	8.82E-11	3:43066558:A_G	2.85E-10	Brain_Cerebellum:Skin_Sun_Exposed_Lower_leg:Thyroid:BIOS_eQTL_geneLevel
KRBOX1	3	42850975	42984284	8.82E-11	3:43066558:A_G	2.85E-10	BIOS_eQTL_geneLevel
ACKR2	3	42846244	42929466	8.82E-11	3:43066558:A_G	4.31E-17	BIOS_eQTL_geneLevel
HIGD1A	3	42798669	42846023	1.53E-09	3:43066558:A_G	0.0000116	Esophagus_Muscularis
POMGNT2	3	43120724	43147568	1.53E-09	3:43066558:A_G	0.0000035	BIOS_eQTL_geneLevel
ANO10	3	43396351	43733086	5.28E-09	3:44049114:A_G;3:44062561:A_G	0.00000373	Brain_Caudate_basal_ganglia
RBM5	3	50126341	50156454	7.32E-12	3:49899795:A_G;3:50209053:G_T;3:50218879:C_T;3:49860854:C_T;3:49890613:C_T	6.26E-08	Nerve_Tibial:BIOS_eQTL_geneLevel
APEH	3	49711435	49721396	4.04E-11	3:49621994:C_T;3:49863483:C_T;3:49890613:C_T;3:49899795:A_G;3:50070843:A_T;3:50209053:G_T	4.22E-10	Cells_Transformed_fibroblasts:BIOS_eQTL_geneLevel
FAM212A	3	49840687	49842463	7.32E-12	3:49863483:C_T;3:49890613:C_T;3:49899795:A_G;3:50209053:G_T;3:49621994:C_T;3:49860854:C_T;3:50218879:C_T	6.16E-25	Artery_Tibial:Brain_Cerebellar_Hemisphere:Brain_Cerebellum:Esophagus_Mucosa:Muscle_Skeletal:Cells_Transformed_fibroblasts:Skin_Not_Sun_Exposed_Suprapubic:Skin_Sun_Exposed_Lower_leg:BIOS_eQTL_geneLevel
QRICH1	3	49067140	49131796	1.92E-11	3:49863483:C_T;3:49211989:C_T;3:49621994:C_T;3:48941551:C_T	1.43E-43	Adipose_Subcutaneous:Breast_Mammary_Tissue:Colon_Transverse:Esophagus_Mucosa:Esophagus_Muscularis:Lung:Nerve_Tibial:Pancreas:Skin_Sun_Exposed_Lower_leg:Testis:BIOS_eQTL_geneLevel
UBA7	3	49842640	49851379	7.32E-12	3:49863483:C_T;3:49890613:C_T;3:49899795:A_G;3:50209053:G_T;3:49621994:C_T;3:49860854:C_T;3:50218879:C_T	1.09E-239	Whole_Blood:Artery_Tibial:Colon_Transverse:Esophagus_Mucosa:Lung:Cells_Transformed_fibroblasts:Skin_Not_Sun_Exposed_Suprapubic:Skin_Sun_Exposed_Lower_leg:Spleen:Stomach:Thyroid:BIOS_eQTL_geneLevel
CAMKV	3	49895421	49907655	1.05E-10	3:49621994:C_T;3:49863483:C_T;3:49890613:C_T;3:49899795:A_G;3:50209053:G_T	4.06E-09	Small_Intestine_Terminal_Ileum:Stomach:Testis
RBM6	3	49977440	50137478	7.32E-12	3:49621994:C_T;3:49860854:C_T;3:49863483:C_T;3:49890613:C_T;3:49899795:A_G;3:50070843:A_T;3:50209053:G_T;3:50218879:C_T;3:50297330:A_G	3.27167000000001e-310	Adipose_Subcutaneous:Adipose_Visceral_Omentum:Adrenal_Gland:Cells_EBV-transformed_lymphocytes:Whole_Blood:Artery_Aorta:Artery_Coronary:Artery_Tibial:Brain_Anterior_cingulate_cortex_BA24:Brain_Caudate_basal_ganglia:Brain_Cerebellar_Hemisphere:Brain_Cerebellum:Brain_Cortex:Brain_Frontal_Cortex_BA9:Brain_Nucleus_accumbens_basal_ganglia:Brain_Putamen_basal_ganglia:Breast_Mammary_Tissue:Colon_Sigmoid:…
ARIH2	3	48956254	49023815	1.92E-11	3:49200137:G_T;3:49211989:C_T;3:49621994:C_T;3:49863483:C_T;3:48941551:C_T	3.94E-95	Adipose_Subcutaneous:Brain_Frontal_Cortex_BA9:Breast_Mammary_Tissue:Colon_Transverse:Esophagus_Mucosa:Lung:Nerve_Tibial:Pancreas:Cells_Transformed_fibroblasts:Skin_Not_Sun_Exposed_Suprapubic:Skin_Sun_Exposed_Lower_leg:Thyroid:BIOS_eQTL_geneLevel
DAG1	3	49506146	49573048	7.99E-10	3:49890613:C_T;3:48941551:C_T;3:49863483:C_T	0.00000139	BIOS_eQTL_geneLevel
KLHDC8B	3	49209044	49213917	1.92E-11	3:49200137:G_T;3:49211989:C_T;3:49621994:C_T	3.63E-19	Adipose_Subcutaneous:Cells_EBV-transformed_lymphocytes:Esophagus_Muscularis:Nerve_Tibial:Ovary:Cells_Transformed_fibroblasts:Skin_Sun_Exposed_Lower_leg:Thyroid:BIOS_eQTL_geneLevel
GMPPB	3	49754277	49761384	4.04E-11	3:49621994:C_T;3:49860854:C_T;3:49863483:C_T;3:49890613:C_T;3:49899795:A_G;3:50209053:G_T	8E-54	BIOS_eQTL_geneLevel
CCDC36	3	49235861	49295537	1.92E-11	3:49200137:G_T;3:49211989:C_T;3:49621994:C_T	1.6E-16	Adipose_Visceral_Omentum:Artery_Aorta:Artery_Coronary:Artery_Tibial:Colon_Sigmoid:Esophagus_Mucosa:Esophagus_Muscularis:Heart_Atrial_Appendage:Heart_Left_Ventricle:Lung:Muscle_Skeletal:Nerve_Tibial:Prostate:Cells_Transformed_fibroblasts
C3orf62	3	49306035	49315342	1.92E-11	3:49200137:G_T;3:49211989:C_T;3:49621994:C_T;3:48941551:C_T	1.56E-12	BIOS_eQTL_geneLevel
AMIGO3	3	49754267	49761349	4.04E-11	3:49621994:C_T;3:49860854:C_T;3:49863483:C_T;3:49890613:C_T;3:49899795:A_G;3:50209053:G_T	8E-54	BIOS_eQTL_geneLevel
RHOA	3	49396578	49450431	4.58E-09	3:49211989:C_T;3:49621994:C_T;3:49863483:C_T	0.00000221	Muscle_Skeletal
CDHR4	3	49828165	49837268	4.04E-11	3:48941551:C_T;3:49860854:C_T;3:49890613:C_T;3:49621994:C_T;3:49863483:C_T	9.68E-11	Adipose_Visceral_Omentum:Skin_Not_Sun_Exposed_Suprapubic:Testis
LAMB2	3	49158547	49170551	1.92E-11	3:49200137:G_T;3:49211989:C_T;3:49621994:C_T;3:49863483:C_T;3:48941551:C_T	1.07E-17	BIOS_eQTL_geneLevel
MST1	3	49721380	49726934	7.76E-10	3:49860854:C_T;3:49863483:C_T;3:49899795:A_G;3:50070843:A_T;3:49621994:C_T	7.95E-09	Adipose_Subcutaneous:Colon_Transverse:Esophagus_Mucosa:Cells_Transformed_fibroblasts:Skin_Not_Sun_Exposed_Suprapubic:Thyroid:BIOS_eQTL_geneLevel
MST1R	3	49924435	49941299	7.32E-12	3:49860854:C_T;3:49890613:C_T;3:49899795:A_G;3:50209053:G_T;3:50218879:C_T	1.97E-11	Adipose_Subcutaneous:Brain_Cerebellar_Hemisphere:Brain_Cerebellum:Esophagus_Muscularis:Heart_Atrial_Appendage:Lung:Muscle_Skeletal:Nerve_Tibial:Cells_Transformed_fibroblasts:Skin_Not_Sun_Exposed_Suprapubic:Skin_Sun_Exposed_Lower_leg:Thyroid:BIOS_eQTL_geneLevel
IP6K2	3	48725436	48777786	3.62E-11	3:49200137:G_T;3:49211989:C_T;3:49863483:C_T;3:48941551:C_T	7.31E-21	Brain_Cerebellar_Hemisphere:Cells_Transformed_fibroblasts:Skin_Sun_Exposed_Lower_leg:BIOS_eQTL_geneLevel
RNF123	3	49726932	49758962	7.32E-12	3:48941551:C_T;3:49621994:C_T;3:49860854:C_T;3:49890613:C_T;3:49899795:A_G;3:50209053:G_T;3:50218879:C_T;3:50297330:A_G;3:49863483:C_T	8E-54	Adipose_Subcutaneous:Adipose_Visceral_Omentum:Artery_Aorta:Artery_Tibial:Brain_Caudate_basal_ganglia:Brain_Cerebellar_Hemisphere:Brain_Cerebellum:Brain_Cortex:Brain_Frontal_Cortex_BA9:Brain_Putamen_basal_ganglia:Breast_Mammary_Tissue:Colon_Sigmoid:Colon_Transverse:Esophagus_Gastroesophageal_Junction:Esophagus_Mucosa:Esophagus_Muscularis:Heart_Atrial_Appendage:Lung:Nerve_Tibial:Cells_Transformed_f…
SEMA3F	3	50192478	50226508	7.32E-12	3:49899795:A_G;3:50209053:G_T;3:50218879:C_T	0.00000474	Artery_Aorta:Nerve_Tibial
CCDC71	3	49199968	49203754	1.92E-11	3:49200137:G_T;3:49211989:C_T;3:49621994:C_T	2.19E-42	Cells_EBV-transformed_lymphocytes:Brain_Caudate_basal_ganglia:Brain_Cerebellar_Hemisphere:Brain_Cerebellum:Brain_Frontal_Cortex_BA9:Brain_Nucleus_accumbens_basal_ganglia:BIOS_eQTL_geneLevel
USP4	3	49315264	49378145	4.58E-09	3:49200137:G_T;3:49211989:C_T;3:49621994:C_T;3:48941551:C_T	1.56E-12	BIOS_eQTL_geneLevel
IFRD2	3	50325163	50330349	7.32E-12	3:49860854:C_T;3:49890613:C_T;3:49899795:A_G;3:50070843:A_T;3:50209053:G_T;3:50218879:C_T;3:50297330:A_G	6.14E-112	Stomach:BIOS_eQTL_geneLevel
NICN1	3	49460379	49466759	1.92E-11	3:48941551:C_T;3:49211989:C_T;3:49621994:C_T;3:49863483:C_T;3:49890613:C_T	8.32E-22	Adipose_Subcutaneous:Adipose_Visceral_Omentum:Artery_Aorta:Artery_Tibial:Breast_Mammary_Tissue:Esophagus_Mucosa:Lung:Muscle_Skeletal:Nerve_Tibial:Cells_Transformed_fibroblasts:Thyroid
MON1A	3	49946302	49967606	1.05E-10	3:49890613:C_T;3:49899795:A_G;3:50209053:G_T;3:50070843:A_T	0.0000052	Testis
BSN	3	49591922	49708978	5.84E-10	3:49863483:C_T;3:49890613:C_T;3:49899795:A_G;3:49621994:C_T	0.000000477	BIOS_eQTL_geneLevel
IP6K1	3	49761727	49823975	8.49E-10	3:48941551:C_T;3:49621994:C_T;3:49860854:C_T;3:49890613:C_T	0.00000394	Lung
WDR6	3	49044495	49053386	1.92E-11	3:49200137:G_T;3:49211989:C_T;3:49621994:C_T;3:49863483:C_T	7.82E-243	Adipose_Subcutaneous:Adipose_Visceral_Omentum:Cells_EBV-transformed_lymphocytes:Whole_Blood:Artery_Aorta:Artery_Coronary:Artery_Tibial:Brain_Cerebellar_Hemisphere:Brain_Cerebellum:Breast_Mammary_Tissue:Colon_Transverse:Esophagus_Mucosa:Esophagus_Muscularis:Heart_Atrial_Appendage:Heart_Left_Ventricle:Liver:Lung:Muscle_Skeletal:Nerve_Tibial:Pancreas:Cells_Transformed_fibroblasts:Skin_Not_Sun_Expose…
LSMEM2	3	50316458	50325545	0.000000011	3:49860854:C_T;3:50297330:A_G	5.93E-12	BIOS_eQTL_geneLevel
DOCK3	3	50712672	51421629	7.32E-12	3:49890613:C_T;3:49899795:A_G;3:50209053:G_T;3:50218879:C_T	0.000000187	Thyroid
NAT6	3	50333833	50336852	7.32E-12	3:49860854:C_T;3:49863483:C_T;3:49890613:C_T;3:49899795:A_G;3:50209053:G_T;3:50218879:C_T;3:50297330:A_G	1.19E-54	Adipose_Subcutaneous:Artery_Aorta:Skin_Sun_Exposed_Lower_leg:BIOS_eQTL_geneLevel
NDUFAF3	3	49057892	49060928	4.1E-09	3:49211989:C_T;3:49621994:C_T	0.000000962	BIOS_eQTL_geneLevel
AMT	3	49454211	49460186	1.92E-11	3:48941551:C_T;3:49211989:C_T;3:49621994:C_T;3:49863483:C_T;3:49890613:C_T;3:49899795:A_G;3:50218879:C_T	6.93E-171	Adipose_Subcutaneous:Adipose_Visceral_Omentum:Cells_EBV-transformed_lymphocytes:Whole_Blood:Artery_Aorta:Artery_Coronary:Artery_Tibial:Brain_Anterior_cingulate_cortex_BA24:Brain_Caudate_basal_ganglia:Brain_Cerebellar_Hemisphere:Brain_Cerebellum:Brain_Cortex:Brain_Hippocampus:Breast_Mammary_Tissue:Colon_Sigmoid:Colon_Transverse:Esophagus_Gastroesophageal_Junction:Esophagus_Mucosa:Esophagus_Muscula…
GPX1	3	49394609	49396033	1.92E-11	3:49200137:G_T;3:49211989:C_T;3:49621994:C_T;3:49863483:C_T;3:49890613:C_T;3:49899795:A_G;3:50070843:A_T;3:50209053:G_T;3:50218879:C_T	2.45E-09	Adipose_Visceral_Omentum:Adrenal_Gland:Artery_Aorta:Artery_Tibial:Brain_Cerebellum:Brain_Cortex:Brain_Frontal_Cortex_BA9:Colon_Sigmoid:Colon_Transverse:Esophagus_Mucosa:Esophagus_Muscularis:Nerve_Tibial:Cells_Transformed_fibroblasts:Skin_Sun_Exposed_Lower_leg:Stomach:Thyroid:BIOS_eQTL_geneLevel
HYAL1	3	50337320	50349812	9.85E-10	3:49890613:C_T;3:49899795:A_G;3:50209053:G_T	0.000000224	Nerve_Tibial
TMA7	3	48481667	48485616	2.65E-08	3:49621994:C_T	0.000000613	Muscle_Skeletal
NCKIPSD	3	48701364	48723797	1.92E-11	3:49200137:G_T;3:49211989:C_T;3:49621994:C_T	2.51E-24	Adipose_Subcutaneous:Adipose_Visceral_Omentum:Adrenal_Gland:Whole_Blood:Artery_Aorta:Artery_Tibial:Brain_Anterior_cingulate_cortex_BA24:Brain_Caudate_basal_ganglia:Brain_Cerebellar_Hemisphere:Brain_Cortex:Brain_Frontal_Cortex_BA9:Brain_Hippocampus:Brain_Hypothalamus:Brain_Putamen_basal_ganglia:Colon_Sigmoid:Colon_Transverse:Esophagus_Mucosa:Esophagus_Muscularis:Heart_Left_Ventricle:Liver:Lung:Mus…
P4HTM	3	49027319	49044587	1.92E-11	3:49200137:G_T;3:49211989:C_T;3:49621994:C_T;3:49863483:C_T	2.62E-32	Artery_Aorta:Lung:Pancreas:Cells_Transformed_fibroblasts:Thyroid:BIOS_eQTL_geneLevel
DALRD3	3	49052921	49059726	1.92E-11	3:49200137:G_T;3:49211989:C_T;3:49621994:C_T;3:49863483:C_T	6.09E-188	Artery_Coronary:Esophagus_Mucosa:Pancreas:Cells_Transformed_fibroblasts:Thyroid:BIOS_eQTL_geneLevel
TCTA	3	49449639	49453908	1.92E-11	3:49211989:C_T;3:49621994:C_T;3:49899795:A_G;3:50209053:G_T;3:50218879:C_T	4.38E-08	Cells_Transformed_fibroblasts:BIOS_eQTL_geneLevel
MAPKAPK3	3	50648951	50686720	7.32E-12	3:50209053:G_T;3:50218879:C_T	0.0000559	Thyroid
HYAL3	3	50330262	50336899	7.32E-12	3:49211989:C_T;3:49621994:C_T;3:49860854:C_T;3:49890613:C_T;3:49899795:A_G;3:50070843:A_T;3:50209053:G_T;3:50218879:C_T;3:50297330:A_G	1.52E-151	Adipose_Subcutaneous:Adipose_Visceral_Omentum:Adrenal_Gland:Whole_Blood:Artery_Aorta:Artery_Tibial:Brain_Cerebellum:Brain_Cortex:Brain_Nucleus_accumbens_basal_ganglia:Breast_Mammary_Tissue:Colon_Transverse:Esophagus_Gastroesophageal_Junction:Esophagus_Mucosa:Esophagus_Muscularis:Heart_Atrial_Appendage:Heart_Left_Ventricle:Lung:Muscle_Skeletal:Ovary:Pancreas:Cells_Transformed_fibroblasts:Small_Int…
CGGBP1	3	88101094	88199035	2.19E-08	3:88001713:A_G	1.82E-30	Adipose_Subcutaneous:Adrenal_Gland:Artery_Tibial:Colon_Sigmoid:Esophagus_Gastroesophageal_Junction:Esophagus_Mucosa:Esophagus_Muscularis:Nerve_Tibial:Pancreas:Skin_Not_Sun_Exposed_Suprapubic:Skin_Sun_Exposed_Lower_leg:Thyroid:BIOS_eQTL_geneLevel
HHLA2	3	108015376	108097132	2.28E-08	3:107946831:C_G;3:107955515:A_G	0.000000933	Colon_Transverse:BIOS_eQTL_geneLevel
CD47	3	107762145	107809872	2.28E-08	3:107946831:C_G;3:107955515:A_G	1.15E-52	BIOS_eQTL_geneLevel
IFT57	3	107879659	107941417	2.28E-08	3:107946831:C_G;3:107955515:A_G	6.67E-18	Whole_Blood:Colon_Transverse:BIOS_eQTL_geneLevel
LSAMP	3	115521235	117716095	2.66E-12	3:117642005:A_C;3:117535656:C_T;3:117602144:C_T;3:117332915:A_G	1.61E-11	Adrenal_Gland
PLCH1	3	155093369	155462856	3.46E-09	3:155353632:C_T;3:155432229:C_T	7.31E-12	Nerve_Tibial:Pancreas:BIOS_eQTL_geneLevel
C3orf33	3	155480401	155524140	3.46E-09	3:155432229:C_T;3:155353632:C_T	0.00000242	BIOS_eQTL_geneLevel
SLC33A1	3	155538813	155572218	3.46E-09	3:155353632:C_T;3:155432229:C_T	2.02E-16	Adipose_Subcutaneous:Artery_Tibial:Esophagus_Muscularis:BIOS_eQTL_geneLevel
MFSD1	3	158449987	158547508	2.13E-08	3:158522463:C_T	1.64E-28	Adipose_Subcutaneous:Artery_Tibial:Lung:Nerve_Tibial:BIOS_eQTL_geneLevel
MLF1	3	158288952	158325041	2.13E-08	3:158522463:C_T	3.83E-16	Esophagus_Mucosa:Heart_Left_Ventricle
RSRC1	3	157823644	158263519	0.000000615	3:158522463:C_T	0.0000342	BIOS_eQTL_geneLevel
LXN	3	158363611	158390482	2.13E-08	3:158522463:C_T	1.82E-10	Cells_Transformed_fibroblasts:BIOS_eQTL_geneLevel
GFM1	3	158362067	158410364	2.13E-08	3:158522463:C_T	1.08E-29	Artery_Aorta:Esophagus_Mucosa:Nerve_Tibial:Ovary:Pancreas:Skin_Not_Sun_Exposed_Suprapubic:Skin_Sun_Exposed_Lower_leg:Thyroid:BIOS_eQTL_geneLevel
GPR125	4	22346694	22517677	2.23E-08	4:22050165:C_G	0.0000002	Heart_Atrial_Appendage
PRKG2	4	82009837	82136218	6.13E-10	4:82288564:A_G;4:82309913:C_T	1.56E-20	Nerve_Tibial
MMRN1	4	90800683	90875780	1.52E-12	4:90596923:C_G;4:90628439:C_G;4:90757845:C_T;4:90832001:C_T;4:90933505:A_C;4:90820809:C_T	1.69E-53	BIOS_eQTL_geneLevel
SNCA	4	90645250	90759466	5.43E-12	4:90628439:C_G;4:90757845:C_T;4:90832001:C_T;4:90933505:A_C	9.33E-19	Artery_Tibial:Breast_Mammary_Tissue:Heart_Left_Ventricle:BIOS_eQTL_geneLevel
PPA2	4	106290234	106395238	4.53E-13	4:106055212:C_T;4:106094427:A_G;4:106112676:G_T;4:106127121:C_T;4:106256521:A_C;4:106309224:A_G	1.83E-44	Adipose_Subcutaneous:Artery_Tibial:Brain_Cerebellar_Hemisphere:Brain_Cortex:Esophagus_Gastroesophageal_Junction:Esophagus_Mucosa:Esophagus_Muscularis:Heart_Atrial_Appendage:Heart_Left_Ventricle:Muscle_Skeletal:Nerve_Tibial:Ovary:Cells_Transformed_fibroblasts:Testis:Thyroid:BIOS_eQTL_geneLevel
TET2	4	106067032	106200973	5.73E-13	4:106112676:G_T;4:106309224:A_G;4:106094427:A_G;4:106127121:C_T;4:106256521:A_C	0.0000104	Cells_Transformed_fibroblasts:Skin_Sun_Exposed_Lower_leg
ARHGAP10	4	148653214	148993931	1.97E-08	4:148987430:A_G;4:149002841:C_T	0.000000625	Liver:BIOS_eQTL_geneLevel
KIF2A	5	61601989	61833076	1.69E-09	5:61396472:A_G;5:61514611:C_T	8.03E-18	Artery_Aorta:Artery_Tibial:Esophagus_Muscularis:Testis:BIOS_eQTL_geneLevel
DIMT1	5	61683081	61699766	1.69E-09	5:61396472:A_G;5:61514611:C_T	1.06E-11	Adipose_Visceral_Omentum:Esophagus_Muscularis:Testis:BIOS_eQTL_geneLevel
RASGRF2	5	80256491	80525975	6.83E-09	5:80296433:G_T;5:80296487:A_G	2.52E-19	BIOS_eQTL_geneLevel
MSH3	5	79950467	80172279	0.000000013	5:80296433:G_T	0.000000107	BIOS_eQTL_geneLevel
TMEM161B	5	87485450	87565293	9.04E-16	5:87693561:C_T;5:87485064:A_G	1.98E-61	BIOS_eQTL_geneLevel
PAM	5	102089685	102366809	1.64E-10	5:102118385:C_T;5:102660400:C_T	3.27167000000001E-310	Whole_Blood:Brain_Cerebellar_Hemisphere:Nerve_Tibial:Stomach:Thyroid:BIOS_eQTL_geneLevel
PPIP5K2	5	102455853	102548500	1.64E-10	5:102118385:C_T;5:102660400:C_T	4.5E-94	Adipose_Subcutaneous:Adrenal_Gland:Cells_EBV-transformed_lymphocytes:Whole_Blood:Artery_Aorta:Artery_Tibial:Nerve_Tibial:Spleen:Stomach:Thyroid:BIOS_eQTL_geneLevel
GIN1	5	102421704	102455855	5.21E-09	5:102660400:C_T	0.000018	Muscle_Skeletal
EFNA5	5	106712590	107006596	4.83E-10	5:106849674:A_G;5:106899684:A_G;5:106918329:A_G	0.00000868	Esophagus_Mucosa:Thyroid
SMAD5	5	135468534	135524435	5.14E-17	5:135414893:C_T;5:135605017:A_C;5:135608525:A_G;5:135646205:G_T;5:135653737:A_C	3.18E-89	Whole_Blood:Cells_Transformed_fibroblasts:Thyroid:BIOS_eQTL_geneLevel
PCDH1	5	141232938	141258811	1.21E-10	5:141254063:A_C	1.3E-22	BIOS_eQTL_geneLevel
PCDH12	5	141323150	141349304	1.21E-10	5:141254063:A_C	5.81E-55	BIOS_eQTL_geneLevel
RNF14	5	141337893	141369856	1.21E-10	5:141254063:A_C	5.81E-55	BIOS_eQTL_geneLevel
FAM114A2	5	153369688	153418496	4.72E-08	5:153093998:C_T	0.00000846	BIOS_eQTL_geneLevel
MFAP3	5	153418466	153600038	4.72E-08	5:153093998:C_T	0.00000846	BIOS_eQTL_geneLevel
RNF130	5	179338651	179499118	2.21E-08	5:179511043:A_G	1.81E-13	Artery_Tibial:Cells_Transformed_fibroblasts:Thyroid:BIOS_eQTL_geneLevel
TBC1D9B	5	179289066	179334859	2.21E-08	5:179511043:A_G	3.56E-09	BIOS_eQTL_geneLevel
LTC4S	5	179220981	179223648	0.00000145	5:179511043:A_G	0.00000295	BIOS_eQTL_geneLevel
C5orf45	5	179261436	179289173	2.21E-08	5:179511043:A_G	0.00000012	BIOS_eQTL_geneLevel
SQSTM1	5	179233388	179265078	2.21E-08	5:179511043:A_G	0.000000234	BIOS_eQTL_geneLevel
MAML1	5	179159851	179223512	0.00000145	5:179511043:A_G	0.00000295	BIOS_eQTL_geneLevel
TRIM27	6	28870779	28891766	3.36E-08	6:29274356:A_T;6:29355113:C_T	5.96E-139	Whole_Blood:Esophagus_Mucosa:Lung:Skin_Not_Sun_Exposed_Suprapubic:Skin_Sun_Exposed_Lower_leg:BIOS_eQTL_geneLevel
SCAND3	6	28539407	28583989	0.00000645	6:29274356:A_T	0.0000225	Artery_Aorta
ZSCAN23	6	28399707	28411279	0.000000381	6:29274356:A_T	8.42E-09	Adipose_Subcutaneous:Breast_Mammary_Tissue:Esophagus_Muscularis:Muscle_Skeletal:Cells_Transformed_fibroblasts:Skin_Sun_Exposed_Lower_leg
GABBR1	6	29523406	29601753	3.36E-08	6:29274356:A_T;6:29355113:C_T	1.06E-08	BIOS_eQTL_geneLevel
ZNF311	6	28962562	28973093	0.00000484	6:29274356:A_T	3.3E-10	BIOS_eQTL_geneLevel
ZSCAN31	6	28292470	28324048	4.96E-08	6:29274356:A_T	7.08E-12	Colon_Transverse:Esophagus_Mucosa:Esophagus_Muscularis:Lung:Muscle_Skeletal:Pancreas:Skin_Not_Sun_Exposed_Suprapubic:Skin_Sun_Exposed_Lower_leg:Stomach:Thyroid
C6orf100	6	28911654	28912314	4.96E-08	6:29274356:A_T	1.54E-12	Adipose_Subcutaneous:Artery_Aorta:Artery_Coronary:Artery_Tibial:Brain_Nucleus_accumbens_basal_ganglia:Colon_Transverse:Lung
ZNF165	6	28048753	28057341	0.00000488	6:29274356:A_T	0.0000049	Muscle_Skeletal:Cells_Transformed_fibroblasts
OR2H2	6	29555683	29556745	0.00000082	6:29274356:A_T	0.00000621	BIOS_eQTL_geneLevel
ZKSCAN3	6	28317691	28336947	0.00000106	6:29274356:A_T	0.000000213	Esophagus_Muscularis:Skin_Sun_Exposed_Lower_leg:Testis:Thyroid
MDC1	6	30667584	30685666	8.91E-10	6:30576781:C_G	0.0000081	BIOS_eQTL_geneLevel
TRIM31	6	30070674	30080883	8.91E-10	6:30576781:C_G	0.000000535	Lung
PPP1R18	6	30644166	30655672	8.91E-10	6:30576781:C_G	0.000000103	BIOS_eQTL_geneLevel
HLA-E	6	30457244	30461982	8.91E-10	6:30576781:C_G	2.64E-28	BIOS_eQTL_geneLevel
HLA-G	6	29794744	29798902	8.91E-10	6:30576781:C_G	0.0000115	Testis
SFTA2	6	30899130	30899952	8.91E-10	6:30576781:C_G	0.0000117	Thyroid
DDR1	6	30844198	30867933	1.32E-09	6:30576781:C_G	1.36E-13	BIOS_eQTL_geneLevel
MSH5-SAPCD1	6	31707797	31732628	0.000000372	6:31563228:A_C;6:31475127:A_G	0.0000278	BIOS_eQTL_geneLevel
ATP6V1G2-DDX39B	6	31497996	31514385	7.88E-10	6:31475127:A_G;6:31563228:A_C	4.9E-76	BIOS_eQTL_geneLevel
CSNK2B	6	31633013	31638120	1.23E-08	6:31475127:A_G;6:31563228:A_C	8.59E-10	BIOS_eQTL_geneLevel
DDAH2	6	31694815	31698394	7.88E-10	6:31563228:A_C;6:31475127:A_G	6.96E-49	Cells_Transformed_fibroblasts:BIOS_eQTL_geneLevel
NCR3	6	31556672	31560762	7.88E-10	6:31563228:A_C;6:31475127:A_G	2.53E-10	BIOS_eQTL_geneLevel
MICB	6	31462658	31478901	7.88E-10	6:31475127:A_G;6:31563228:A_C	1.21E-25	Whole_Blood:Brain_Cerebellum:Lung:Cells_Transformed_fibroblasts:BIOS_eQTL_geneLevel
MSH5	6	31707725	31732622	0.000000372	6:31563228:A_C;6:31475127:A_G	0.0000278	BIOS_eQTL_geneLevel
ATP6V1G2	6	31512239	31516204	7.88E-10	6:31475127:A_G;6:31563228:A_C	4.9E-76	BIOS_eQTL_geneLevel
PRRC2A	6	31588497	31605548	0.000000372	6:31563228:A_C	0.0000108	BIOS_eQTL_geneLevel
BAG6	6	31606805	31620482	7.88E-10	6:31475127:A_G;6:31563228:A_C	0.000000149	Artery_Tibial:BIOS_eQTL_geneLevel
DDX39B	6	31497996	31510225	7.88E-10	6:31475127:A_G;6:31563228:A_C	2.17E-52	Esophagus_Mucosa:Muscle_Skeletal:Thyroid:BIOS_eQTL_geneLevel
C6orf48	6	31802385	31807541	1.23E-08	6:31563228:A_C	7.18E-13	BIOS_eQTL_geneLevel
AIF1	6	31582961	31584798	1.16E-09	6:31475127:A_G;6:31563228:A_C	0.00000147	Pancreas:BIOS_eQTL_geneLevel
LY6G5B	6	31637944	31641553	1.23E-08	6:31475127:A_G;6:31563228:A_C	4.08E-21	BIOS_eQTL_geneLevel
LY6G5C	6	31644461	31651817	0.000000372	6:31563228:A_C	0.000000231	BIOS_eQTL_geneLevel
MICA	6	31371356	31383092	7.88E-10	6:31475127:A_G;6:31563228:A_C	4.43E-16	Artery_Tibial:Heart_Left_Ventricle:Muscle_Skeletal:Cells_Transformed_fibroblasts:Thyroid:BIOS_eQTL_geneLevel
MUC22	6	30978251	31003179	7.88E-10	6:31475127:A_G;6:31563228:A_C	4.71E-10	Esophagus_Mucosa
CDSN	6	31082867	31088223	0.00000283	6:31563228:A_C	0.000000117	BIOS_eQTL_geneLevel
EHMT2	6	31847536	31865464	0.000000397	6:31563228:A_C	0.0000233	BIOS_eQTL_geneLevel
ATF6B	6	32065953	32096030	0.000000372	6:31563228:A_C	0.00000168	Adipose_Subcutaneous
CYP21A2	6	32006042	32009447	1.23E-08	6:31563228:A_C	8.12E-23	Adipose_Subcutaneous:Artery_Tibial:Breast_Mammary_Tissue:Nerve_Tibial:Thyroid:BIOS_eQTL_geneLevel
PSORS1C1	6	31082527	31107869	7.88E-10	6:31475127:A_G;6:31563228:A_C	7.04E-21	Adipose_Subcutaneous:Artery_Aorta:Artery_Tibial:Esophagus_Mucosa:Ovary:Cells_Transformed_fibroblasts:Skin_Sun_Exposed_Lower_leg:BIOS_eQTL_geneLevel
PSORS1C2	6	31105313	31107127	3.08E-09	6:31475127:A_G;6:31563228:A_C	7.04E-21	Adipose_Subcutaneous:Esophagus_Mucosa:Cells_Transformed_fibroblasts:BIOS_eQTL_geneLevel
AGER	6	32148745	32152101	1.23E-08	6:31563228:A_C	0.00000603	Cells_Transformed_fibroblasts
HCG27	6	31165537	31171745	7.88E-10	6:31475127:A_G;6:31563228:A_C	1.25E-58	Adipose_Subcutaneous:Adrenal_Gland:Cells_EBV-transformed_lymphocytes:Whole_Blood:Artery_Aorta:Artery_Tibial:Brain_Caudate_basal_ganglia:Brain_Cerebellum:Breast_Mammary_Tissue:Colon_Transverse:Esophagus_Mucosa:Esophagus_Muscularis:Heart_Left_Ventricle:Lung:Muscle_Skeletal:Nerve_Tibial:Pancreas:Cells_Transformed_fibroblasts:Skin_Not_Sun_Exposed_Suprapubic:Skin_Sun_Exposed_Lower_leg:Testis:Thyroid:B…
HLA-B	6	31321649	31324965	7.88E-10	6:31475127:A_G;6:31563228:A_C	1.95E-38	Adipose_Subcutaneous:Adipose_Visceral_Omentum:Cells_EBV-transformed_lymphocytes:Whole_Blood:Artery_Aorta:Artery_Tibial:Brain_Cerebellar_Hemisphere:Breast_Mammary_Tissue:Colon_Transverse:Esophagus_Muscularis:Heart_Atrial_Appendage:Heart_Left_Ventricle:Lung:Muscle_Skeletal:Nerve_Tibial:Ovary:Cells_Transformed_fibroblasts:Skin_Not_Sun_Exposed_Suprapubic:Skin_Sun_Exposed_Lower_leg:Testis:Thyroid:BIOS…
HLA-C	6	31236526	31239907	7.88E-10	6:31475127:A_G;6:31563228:A_C	1.98E-18	Adipose_Subcutaneous:Adrenal_Gland:Whole_Blood:Artery_Aorta:Artery_Tibial:Brain_Caudate_basal_ganglia:Brain_Cerebellum:Brain_Hypothalamus:Breast_Mammary_Tissue:Colon_Sigmoid:Colon_Transverse:Esophagus_Mucosa:Esophagus_Muscularis:Heart_Atrial_Appendage:Heart_Left_Ventricle:Liver:Lung:Muscle_Skeletal:Nerve_Tibial:Ovary:Pancreas:Cells_Transformed_fibroblasts:Skin_Not_Sun_Exposed_Suprapubic:Skin_Sun_…
HLA-DOB	6	32780540	32784825	0.00000196	6:31563228:A_C	0.00000149	Nerve_Tibial
HLA-DQA1	6	32595956	32614839	0.000000618	6:31563228:A_C	0.00000126	Adipose_Subcutaneous:Esophagus_Mucosa
HLA-DQA2	6	32709119	32714992	0.00000125	6:31563228:A_C	8.94E-12	Adipose_Subcutaneous:Whole_Blood:Muscle_Skeletal
HLA-DQB1	6	32627244	32636160	0.000000981	6:31563228:A_C	4.55E-11	Adipose_Subcutaneous:Whole_Blood:Artery_Aorta:Artery_Tibial:Esophagus_Mucosa:Lung:Muscle_Skeletal:Nerve_Tibial:Skin_Sun_Exposed_Lower_leg:Stomach:Thyroid
HLA-DQB2	6	32723875	32731311	0.00000196	6:31563228:A_C	2.15E-09	Adipose_Subcutaneous:Whole_Blood:Muscle_Skeletal
HLA-DRB1	6	32546546	32557625	1.23E-08	6:31563228:A_C	2.39E-20	Adipose_Subcutaneous:Adipose_Visceral_Omentum:Whole_Blood:Artery_Aorta:Artery_Tibial:Breast_Mammary_Tissue:Colon_Sigmoid:Esophagus_Mucosa:Esophagus_Muscularis:Heart_Atrial_Appendage:Heart_Left_Ventricle:Lung:Muscle_Skeletal:Nerve_Tibial:Ovary:Pancreas:Cells_Transformed_fibroblasts:Skin_Not_Sun_Exposed_Suprapubic:Skin_Sun_Exposed_Lower_leg:Stomach:Thyroid
HLA-DRB5	6	32485120	32498064	1.23E-08	6:31475127:A_G;6:31563228:A_C	1.25E-19	Adipose_Subcutaneous:Adipose_Visceral_Omentum:Adrenal_Gland:Cells_EBV-transformed_lymphocytes:Whole_Blood:Artery_Aorta:Artery_Tibial:Breast_Mammary_Tissue:Colon_Sigmoid:Colon_Transverse:Esophagus_Mucosa:Esophagus_Muscularis:Heart_Atrial_Appendage:Heart_Left_Ventricle:Lung:Muscle_Skeletal:Nerve_Tibial:Ovary:Pancreas:Skin_Not_Sun_Exposed_Suprapubic:Skin_Sun_Exposed_Lower_leg:Stomach:Thyroid
MUC21	6	30951495	30957680	0.00000493	6:31563228:A_C	0.00000923	Esophagus_Mucosa
LTA	6	31539831	31542101	1.23E-08	6:31475127:A_G;6:31563228:A_C	0.000000165	BIOS_eQTL_geneLevel
NOTCH4	6	32162620	32191844	7.88E-10	6:31475127:A_G;6:31563228:A_C	1.35E-09	Adipose_Subcutaneous:Esophagus_Mucosa:Stomach
CCHCR1	6	31110216	31126015	7.88E-10	6:31475127:A_G;6:31563228:A_C	2.35E-29	Artery_Tibial:Muscle_Skeletal:Cells_Transformed_fibroblasts:Testis:BIOS_eQTL_geneLevel
POU5F1	6	31132119	31148508	0.00000283	6:31563228:A_C	5.48E-17	BIOS_eQTL_geneLevel
SKIV2L	6	31926857	31937532	0.00000109	6:31563228:A_C	3.28E-11	BIOS_eQTL_geneLevel
TCF19	6	31126319	31134936	1.23E-08	6:31563228:A_C	5.48E-17	Esophagus_Mucosa:BIOS_eQTL_geneLevel
TNF	6	31543344	31546113	7.88E-10	6:31475127:A_G;6:31563228:A_C	1.58E-21	BIOS_eQTL_geneLevel
TNXB	6	32008931	32083111	0.00000196	6:31563228:A_C	3.52E-22	BIOS_eQTL_geneLevel
C2	6	31865562	31913449	0.000000549	6:31563228:A_C	0.000000825	Adipose_Subcutaneous
C4A	6	31949801	31970458	0.000000372	6:31563228:A_C	4.77E-30	Skin_Not_Sun_Exposed_Suprapubic:Skin_Sun_Exposed_Lower_leg:BIOS_eQTL_geneLevel
C4B	6	31982539	32003195	1.23E-08	6:31563228:A_C	7.92E-25	Cells_EBV-transformed_lymphocytes:BIOS_eQTL_geneLevel
VWA7	6	31733367	31745108	1.23E-08	6:31475127:A_G;6:31563228:A_C	0.000000073	BIOS_eQTL_geneLevel
PRRT1	6	32116136	32122150	0.000000372	6:31563228:A_C	5.26E-09	Adipose_Subcutaneous:Esophagus_Mucosa:Skin_Sun_Exposed_Lower_leg
LEMD2	6	33738979	33756913	9.06E-21	6:33647058:C_T;6:33648997:A_G;6:33659536:A_G;6:33689534:A_G;6:33698461:C_T;6:33702079:C_T;6:33702869:C_T;6:33707599:C_T;6:33718418:C_T;6:33777432:C_T;6:33644033:C_T;6:33738314:C_T	1.44E-24	Adipose_Subcutaneous:Adipose_Visceral_Omentum:Adrenal_Gland:Artery_Aorta:Artery_Tibial:Brain_Anterior_cingulate_cortex_BA24:Brain_Caudate_basal_ganglia:Brain_Cerebellar_Hemisphere:Brain_Cerebellum:Brain_Putamen_basal_ganglia:Breast_Mammary_Tissue:Colon_Sigmoid:Colon_Transverse:Esophagus_Mucosa:Esophagus_Muscularis:Heart_Atrial_Appendage:Heart_Left_Ventricle:Lung:Muscle_Skeletal:Nerve_Tibial:Pancr…
UQCC2	6	33662070	33679504	4.68E-20	6:33647058:C_T;6:33702079:C_T;6:33707599:C_T;6:33718418:C_T;6:33738314:C_T;6:33777432:C_T;6:33540209:A_G;6:33648997:A_G;6:33659536:A_G;6:33689534:A_G;6:33702869:C_T	4.37E-24	Esophagus_Mucosa:Muscle_Skeletal:Pancreas:Skin_Sun_Exposed_Lower_leg:Testis:Thyroid:BIOS_eQTL_geneLevel
IP6K3	6	33689444	33714762	9.06E-21	6:33647058:C_T;6:33648997:A_G;6:33659536:A_G;6:33689534:A_G;6:33702079:C_T;6:33702869:C_T;6:33707599:C_T;6:33718418:C_T;6:33738314:C_T;6:33777432:C_T;6:33698461:C_T	9.31E-16	Adipose_Subcutaneous:Artery_Aorta:Esophagus_Muscularis:Lung:Nerve_Tibial:Pancreas:Cells_Transformed_fibroblasts:Testis:Thyroid
ITPR3	6	33588142	33664351	9.06E-21	6:33455574:C_G;6:33540209:A_G;6:33606524:C_G;6:33644033:C_T;6:33647058:C_T;6:33648997:A_G;6:33659536:A_G;6:33689534:A_G;6:33698461:C_T;6:33702079:C_T;6:33702869:C_T;6:33707599:C_T;6:33718418:C_T;6:33738314:C_T;6:33777432:C_T	7.15E-174	BloodeQTL:Adrenal_Gland:Whole_Blood:Esophagus_Mucosa:Esophagus_Muscularis:Nerve_Tibial:Pancreas:Prostate:Skin_Not_Sun_Exposed_Suprapubic:Skin_Sun_Exposed_Lower_leg:Testis:BIOS_eQTL_geneLevel
MLN	6	33762450	33771788	1.85E-19	6:33718418:C_T;6:33647058:C_T;6:33702079:C_T;6:33707599:C_T;6:33738314:C_T;6:33777432:C_T	0.000000428	Testis
BAK1	6	33540329	33548019	9.06E-21	6:33455574:C_G;6:33540209:A_G;6:33606524:C_G;6:33644033:C_T;6:33647058:C_T;6:33648997:A_G;6:33659536:A_G;6:33689534:A_G;6:33702079:C_T;6:33702869:C_T;6:33707599:C_T;6:33718418:C_T;6:33738314:C_T;6:33777432:C_T	3.27167000000001e-310	Adipose_Subcutaneous:Adipose_Visceral_Omentum:Adrenal_Gland:Cells_EBV-transformed_lymphocytes:Whole_Blood:Artery_Aorta:Artery_Tibial:Brain_Cerebellar_Hemisphere:Brain_Cortex:Breast_Mammary_Tissue:Colon_Sigmoid:Colon_Transverse:Esophagus_Mucosa:Esophagus_Muscularis:Heart_Atrial_Appendage:Heart_Left_Ventricle:Liver:Lung:Muscle_Skeletal:Nerve_Tibial:Pancreas:Prostate:Cells_Transformed_fibroblasts:Sk…
DAXX	6	33286335	33297046	1.34E-09	6:33455574:C_G;6:33540209:A_G	2.89E-26	Artery_Aorta:Cells_Transformed_fibroblasts:BIOS_eQTL_geneLevel
SBP1	6	33663196	33663474	3.01E-10	6:33659536:A_G;6:33702869:C_T;6:33718418:C_T	0.0000107	BIOS_eQTL_geneLevel
ZBTB9	6	33422356	33425325	4.41E-08	6:33455574:C_G	1.01E-08	BIOS_eQTL_geneLevel
PACSIN1	6	34433916	34503006	2.19E-09	6:33707599:C_T;6:33777432:C_T	0.000000688	Prostate
CUTA	6	33384219	33386094	5.8E-10	6:33540209:A_G;6:33659536:A_G;6:33702869:C_T;6:33718418:C_T	2.14E-32	BloodeQTL:BIOS_eQTL_geneLevel
PHF1	6	33378176	33384230	5.8E-10	6:33540209:A_G;6:33659536:A_G;6:33702869:C_T;6:33718418:C_T	0.000000139	BloodeQTL:BIOS_eQTL_geneLevel
TAP1	6	32812986	32821755	1.64E-10	6:33659536:A_G;6:33702869:C_T;6:33718418:C_T	0.00000126	Skin_Sun_Exposed_Lower_leg
TAPBP	6	33267471	33282164	4.41E-08	6:33455574:C_G	3.3E-16	Artery_Aorta:Artery_Tibial:Esophagus_Mucosa:Esophagus_Muscularis:Heart_Left_Ventricle:Muscle_Skeletal:Nerve_Tibial:Cells_Transformed_fibroblasts:Thyroid
HSD17B8	6	33172419	33174608	5.88E-08	6:33455574:C_G	3.79E-08	BIOS_eQTL_geneLevel
WDR46	6	33246885	33257304	4.41E-08	6:33455574:C_G	1.62E-09	Esophagus_Mucosa
ZBTB22	6	33282183	33285719	4.41E-08	6:33455574:C_G	9.91E-18	BIOS_eQTL_geneLevel
UHRF1BP1	6	34759857	34850915	1.12E-08	6:34828553:C_T	3.27167000000001e-310	Adipose_Subcutaneous:Adipose_Visceral_Omentum:Adrenal_Gland:Cells_EBV-transformed_lymphocytes:Whole_Blood:Artery_Aorta:Artery_Coronary:Artery_Tibial:Brain_Caudate_basal_ganglia:Brain_Cerebellar_Hemisphere:Brain_Cerebellum:Brain_Frontal_Cortex_BA9:Brain_Hypothalamus:Brain_Putamen_basal_ganglia:Breast_Mammary_Tissue:Colon_Sigmoid:Colon_Transverse:Esophagus_Gastroesophageal_Junction:Esophagus_Mucosa…
C6orf106	6	34555065	34664636	1.12E-08	6:34828553:C_T	1.46E-53	Muscle_Skeletal:BIOS_eQTL_geneLevel
SNRPC	6	34725183	34741571	1.12E-08	6:34828553:C_T	1.81E-20	Adipose_Subcutaneous:Adipose_Visceral_Omentum:Adrenal_Gland:Cells_EBV-transformed_lymphocytes:Artery_Tibial:Brain_Caudate_basal_ganglia:Brain_Cortex:Brain_Frontal_Cortex_BA9:Brain_Hippocampus:Brain_Nucleus_accumbens_basal_ganglia:Brain_Putamen_basal_ganglia:Breast_Mammary_Tissue:Colon_Transverse:Esophagus_Mucosa:Esophagus_Muscularis:Heart_Atrial_Appendage:Lung:Muscle_Skeletal:Nerve_Tibial:Cells_T…
TAF11	6	34845555	34855866	0.000000376	6:34828553:C_T	0.0000774	BIOS_eQTL_geneLevel
MDGA1	6	37600284	37667082	4.04E-12	6:37631768:A_G;6:37650639:C_T;6:37660117:A_G	6.79E-193	Adipose_Subcutaneous:Adipose_Visceral_Omentum:Adrenal_Gland:Cells_EBV-transformed_lymphocytes:Whole_Blood:Artery_Aorta:Artery_Coronary:Artery_Tibial:Breast_Mammary_Tissue:Colon_Sigmoid:Colon_Transverse:Esophagus_Gastroesophageal_Junction:Esophagus_Mucosa:Esophagus_Muscularis:Lung:Muscle_Skeletal:Nerve_Tibial:Cells_Transformed_fibroblasts:Skin_Sun_Exposed_Lower_leg:Spleen:Stomach:Thyroid:BIOS_eQTL…
CCDC167	6	37450696	37467698	4.04E-12	6:37631768:A_G;6:37650639:C_T	0.000000301	BIOS_eQTL_geneLevel
BTBD9	6	38136227	38607924	7.76E-18	6:38320913:C_T;6:38321782:C_T;6:38381108:C_T;6:38401926:C_T;6:38410739:C_T;6:38437538:A_G;6:38452503:C_T;6:38477642:C_T	0.00000282	Heart_Left_Ventricle
GLO1	6	38643701	38670917	7.76E-18	6:38401926:C_T;6:38410739:C_T;6:38437538:A_G;6:38452503:C_T;6:38477642:C_T;6:38632703:C_G	1.21E-34	Artery_Tibial:Esophagus_Muscularis:Lung:Thyroid:BIOS_eQTL_geneLevel
FRS3	6	41737914	41754280	4.08E-08	6:41754370:C_T	7.77E-16	Thyroid:BIOS_eQTL_geneLevel
PRICKLE4	6	41748087	41757879	4.08E-08	6:41754370:C_T	6.41E-16	Adipose_Subcutaneous:Artery_Aorta:Artery_Tibial:Breast_Mammary_Tissue:Heart_Atrial_Appendage:Heart_Left_Ventricle:Lung:Muscle_Skeletal:Nerve_Tibial:Cells_Transformed_fibroblasts:Skin_Not_Sun_Exposed_Suprapubic:Skin_Sun_Exposed_Lower_leg:BIOS_eQTL_geneLevel
BYSL	6	41888926	41900784	4.08E-08	6:41754370:C_T	8.8E-43	BIOS_eQTL_geneLevel
MED20	6	41873092	41888877	4.08E-08	6:41754370:C_T	2.87E-24	Adipose_Subcutaneous:Artery_Tibial:Brain_Cerebellar_Hemisphere:Breast_Mammary_Tissue:Colon_Transverse:Esophagus_Mucosa:Esophagus_Muscularis:Heart_Atrial_Appendage:Heart_Left_Ventricle:Muscle_Skeletal:Nerve_Tibial:Cells_Transformed_fibroblasts:Skin_Sun_Exposed_Lower_leg:Stomach:Thyroid:BIOS_eQTL_geneLevel
TOMM6	6	41755400	41757636	4.08E-08	6:41754370:C_T	7.77E-16	BIOS_eQTL_geneLevel
CCND3	6	41902671	42018095	4.08E-08	6:41754370:C_T	2.15E-20	BIOS_eQTL_geneLevel
ASCC3	6	100956070	101329248	2.18E-11	6:101212001:A_T;6:100925828:C_T;6:100982169:C_T	1.64E-20	Artery_Aorta:Artery_Tibial:Esophagus_Mucosa:Cells_Transformed_fibroblasts:Skin_Sun_Exposed_Lower_leg:BIOS_eQTL_geneLevel
SIM1	6	100832891	100912805	4.11E-10	6:100925828:C_T;6:101212001:A_T	0.0000257	BIOS_eQTL_geneLevel
GRIK2	6	101846664	102517958	9.53E-09	6:101212001:A_T	0.000000305	Artery_Tibial:Lung:Cells_Transformed_fibroblasts
HACE1	6	105175968	105307794	6.03E-13	6:105400605:C_T	3.91E-10	Cells_EBV-transformed_lymphocytes:BIOS_eQTL_geneLevel
SAMD5	6	147830063	148058683	9.94E-10	6:147971725:A_C;6:147980909:A_G	3.29E-16	Brain_Cerebellum:Testis:Thyroid
PACRG	6	163148164	163736524	3.09E-09	6:163214327:A_G;6:163280204:C_T	1.23E-26	Adipose_Subcutaneous:Artery_Aorta:Artery_Coronary:Artery_Tibial:Brain_Cerebellar_Hemisphere:Brain_Cerebellum:Brain_Frontal_Cortex_BA9:Brain_Hypothalamus:Colon_Sigmoid:Colon_Transverse:Esophagus_Gastroesophageal_Junction:Esophagus_Muscularis:Heart_Atrial_Appendage:Nerve_Tibial:Ovary:Stomach:Thyroid
PRKN	6	161768452	163148803	6.83E-09	6:163214327:A_G	3.02E-08	Testis
MAD1L1	7	1855429	2272878	2.11E-08	7:1966841:C_T	3.6E-30	BIOS_eQTL_geneLevel
SDK1	7	3341080	4308632	5.49E-10	7:3307861:C_T;7:3323848:C_T;7:3520024:A_G;7:3709491:G_T;7:3319635:A_G;7:3769198:A_G;7:3824141:A_T	1.25E-54	Adipose_Subcutaneous:Adipose_Visceral_Omentum:Whole_Blood:Colon_Sigmoid:Esophagus_Mucosa:Esophagus_Muscularis:Lung:Muscle_Skeletal:Nerve_Tibial:Cells_Transformed_fibroblasts:Skin_Not_Sun_Exposed_Suprapubic:Skin_Sun_Exposed_Lower_leg:BIOS_eQTL_geneLevel
NDUFA4	7	10971578	10979883	2.86E-08	7:10985188:A_G	6.55E-10	Heart_Left_Ventricle
DNAH11	7	21582833	21941457	0.000000011	7:21687925:C_G	1.19E-14	Esophagus_Muscularis:Liver:Cells_Transformed_fibroblasts:Thyroid
ZPBP	7	49890017	50160925	1.53E-08	7:49894349:A_G	0.000000225	Testis:Thyroid
PRKRIP1	7	102004319	102067123	4.31E-08	7:102008352:A_G	5.09E-26	BIOS_eQTL_geneLevel
UPK3BL	7	102277472	102283238	6.37E-08	7:102008352:A_G	0.00000415	BIOS_eQTL_geneLevel
RASA4B	7	102122892	102158228	4.31E-08	7:102008352:A_G	1.18E-09	BIOS_eQTL_geneLevel
RASA4	7	102220093	102257204	4.31E-08	7:102008352:A_G	5.4E-20	BIOS_eQTL_geneLevel
LRWD1	7	102105376	102113615	4.31E-08	7:102008352:A_G	0.000000426	Brain_Cerebellar_Hemisphere:Brain_Cerebellum:BIOS_eQTL_geneLevel
ALKBH4	7	102096685	102105323	4.31E-08	7:102008352:A_G	6.2E-51	BIOS_eQTL_geneLevel
POLR2J3	7	102178365	102213103	4.31E-08	7:102008352:A_G	2.17E-09	BIOS_eQTL_geneLevel
ORAI2	7	102073553	102097268	4.31E-08	7:102008352:A_G	6.2E-51	BIOS_eQTL_geneLevel
COG5	7	106842000	107204959	4.15E-08	7:106844694:C_T	1.29E-44	Nerve_Tibial:BIOS_eQTL_geneLevel
HBP1	7	106809406	106842974	4.15E-08	7:106844694:C_T	2.46E-08	Testis:BIOS_eQTL_geneLevel
BCAP29	7	107220422	107269615	0.000000064	7:106844694:C_T	0.00000325	BIOS_eQTL_geneLevel
PRKAR2B	7	106685094	106802256	0.000000194	7:106844694:C_T	0.0000331	BIOS_eQTL_geneLevel
FOXP2	7	113726382	114333827	1.83E-16	7:114024179:A_G;7:114047542:C_G;7:113871993:A_T;7:114072443:A_G;7:114218582:C_T;7:114296102:C_T	3.27E-12	Pituitary
SLC35B4	7	133974084	134001803	2.48E-09	7:133894515:C_G;7:133989882:C_T	1.28E-32	Artery_Aorta:Artery_Tibial:Brain_Cerebellar_Hemisphere:Colon_Transverse:Pancreas:Cells_Transformed_fibroblasts:Testis:BIOS_eQTL_geneLevel
PTN	7	136912088	137028611	1.36E-08	7:137075847:A_T	4.94E-29	Esophagus_Mucosa:Nerve_Tibial:Thyroid
MSRA	8	9911778	10286401	8.46E-11	8:10170037:G_T;8:10133477:A_G	2.99E-09	BIOS_eQTL_geneLevel
PPP2CB	8	30631973	30671830	0.00000496	8:30849450:C_T	0.0000216	BIOS_eQTL_geneLevel
SBSPON	8	73976775	74036323	1.57E-08	8:73890425:A_G	0.000000504	BIOS_eQTL_geneLevel
TERF1	8	73921099	73960357	1.57E-08	8:73890425:A_G	0.000000278	Pancreas
TMEM64	8	91634223	91803860	1.34E-13	8:91599039:C_G;8:91669954:A_G;8:91650818:C_T	1.06E-10	Adrenal_Gland:Whole_Blood:Esophagus_Muscularis:BIOS_eQTL_geneLevel
OTUD6B	8	92082424	92099323	2.24E-10	8:91650818:C_T	0.0000103	Nerve_Tibial
UBR5	8	103265240	103425069	0.000000033	8:103356226:A_G	2.03E-25	BIOS_eQTL_geneLevel
RRM2B	8	103216730	103251346	0.000000033	8:103356226:A_G	1.63E-09	Adipose_Subcutaneous:Testis:BIOS_eQTL_geneLevel
TRPS1	8	116420724	116821899	3.37E-08	8:116657235:A_G	0.00000348	BIOS_eQTL_geneLevel
FAM120AOS	9	96208776	96215874	2.12E-12	9:96218194:C_T;9:96361922:A_G;9:96392019:A_G;9:96392815:C_T	1.93E-24	BIOS_eQTL_geneLevel
PHF2	9	96338689	96441869	2.12E-12	9:96218194:C_T;9:96361922:A_G;9:96392815:C_T;9:96392019:A_G	5.97E-08	BIOS_eQTL_geneLevel
C9orf129	9	96080481	96108696	5.44E-12	9:96218194:C_T;9:96361922:A_G	2.04E-11	BIOS_eQTL_geneLevel
WNK2	9	95947198	96082854	5.44E-12	9:96218194:C_T;9:96361922:A_G	2.04E-11	BIOS_eQTL_geneLevel
TLR4	9	120466610	120479149	1.15E-14	9:120501644:G_T;9:120515669:A_G;9:120518991:C_T;9:120521100:C_T;9:120551849:C_G;9:120614014:C_T	4.32E-102	Whole_Blood:Lung:BIOS_eQTL_geneLevel
ZBTB6	9	125670335	125675609	1.15E-10	9:125621610:C_G;9:125867350:C_T	4.74E-13	BIOS_eQTL_geneLevel
RABGAP1	9	125703112	125867145	1.15E-10	9:125621610:C_G;9:125867350:C_T	1.23E-10	Cells_EBV-transformed_lymphocytes:Esophagus_Mucosa:Esophagus_Muscularis:Skin_Not_Sun_Exposed_Suprapubic:Skin_Sun_Exposed_Lower_leg:Testis
RC3H2	9	125606835	125667620	1.15E-10	9:125621610:C_G;9:125867350:C_T	1.17E-09	BIOS_eQTL_geneLevel
STRBP	9	125871779	126030855	1.48E-10	9:125621610:C_G;9:125867350:C_T	0.0000182	BIOS_eQTL_geneLevel
FIBCD1	9	133777825	133814673	3.05E-08	9:133786652:C_T	0.0000145	Skin_Sun_Exposed_Lower_leg
NCS1	9	132934857	132999583	7.53E-08	9:133786652:C_T	0.00000132	Small_Intestine_Terminal_Ileum
MED27	9	134735494	134955295	4.24E-09	9:134886837:A_G	8.65E-38	Whole_Blood:BIOS_eQTL_geneLevel
NTNG2	9	135037334	135119921	4.24E-09	9:134886837:A_G	9.12E-12	BIOS_eQTL_geneLevel
QSOX2	9	139098179	139137687	3.71E-09	9:139109080:C_T	5.97E-28	Artery_Aorta:Artery_Tibial:Cells_Transformed_fibroblasts
EXD3	9	140201348	140317714	6.53E-15	9:140265782:C_T;9:140241209:C_T	0.00000577	BIOS_eQTL_geneLevel
MLLT10	10	21823094	22032559	3.89E-10	10:21821918:A_T	0.000000843	Skin_Sun_Exposed_Lower_leg
ADO	10	64564516	64568238	2.51E-10	10:64519299:C_T;10:64552607:A_G;10:64588424:A_G	6.04E-20	Adipose_Subcutaneous:Adipose_Visceral_Omentum:Artery_Aorta:Lung:Muscle_Skeletal:Testis:BIOS_eQTL_geneLevel
DUPD1	10	76797594	76818272	2.52E-08	10:76825638:A_T;10:76835828:C_T	7.11E-11	Heart_Left_Ventricle:Muscle_Skeletal
DUSP13	10	76854192	76868979	2.52E-08	10:76825638:A_T;10:76835828:C_T	1.07E-30	Testis:BIOS_eQTL_geneLevel
COMTD1	10	76993727	76995788	2.52E-08	10:76825638:A_T;10:76835828:C_T	5.71E-20	BIOS_eQTL_geneLevel
VDAC2	10	76969912	76991206	2.52E-08	10:76825638:A_T;10:76835828:C_T	1.3E-39	Adipose_Subcutaneous:Whole_Blood:Artery_Tibial:Muscle_Skeletal:Nerve_Tibial:Cells_Transformed_fibroblasts:Testis:BIOS_eQTL_geneLevel
NCR3LG1	11	17373273	17398888	3.16E-09	11:17193475:A_T;11:17004090:C_G;11:17115018:A_G	1.68E-17	Artery_Tibial:Esophagus_Mucosa:Nerve_Tibial:Skin_Sun_Exposed_Lower_leg
PLEKHA7	11	16799842	17035990	4.31E-09	11:17004090:C_G;11:17193475:A_T	2.44E-28	BIOS_eQTL_geneLevel
NUCB2	11	17229700	17371521	3.16E-09	11:17115018:A_G;11:17193475:A_T	3.42E-79	Cells_EBV-transformed_lymphocytes:Colon_Transverse:Cells_Transformed_fibroblasts:BIOS_eQTL_geneLevel
PIK3C2A	11	17099277	17229530	3.16E-09	11:17115018:A_G;11:17193475:A_T	6.94E-08	Cells_Transformed_fibroblasts:BIOS_eQTL_geneLevel
KCNC1	11	17756359	17804602	4.71E-08	11:17193475:A_T	0.00000367	Brain_Cortex
KCNJ11	11	17407406	17410878	3.16E-09	11:17115018:A_G;11:17193475:A_T	3.83E-13	Artery_Tibial:Esophagus_Mucosa:Skin_Sun_Exposed_Lower_leg:BIOS_eQTL_geneLevel
ABCC8	11	17414432	17498449	0.00000335	11:17115018:A_G	0.00000114	Brain_Cortex
CELF1	11	47487496	47587121	2.19E-11	11:47406592:C_T;11:47606483:A_G	1.86E-08	BIOS_eQTL_geneLevel
PTPMT1	11	47586982	47595013	7.01E-13	11:47406592:C_T;11:47606483:A_G	1.86E-08	BIOS_eQTL_geneLevel
NDUFS3	11	47586888	47606114	7.01E-13	11:47406592:C_T;11:47606483:A_G	1.86E-08	Cells_Transformed_fibroblasts:BIOS_eQTL_geneLevel
C1QTNF4	11	47611216	47616211	7.01E-13	11:47365199:A_G;11:47406592:C_T;11:47606483:A_G	3.99E-216	Adipose_Subcutaneous:Adipose_Visceral_Omentum:Cells_EBV-transformed_lymphocytes:Whole_Blood:Artery_Aorta:Artery_Coronary:Artery_Tibial:Breast_Mammary_Tissue:Colon_Transverse:Esophagus_Mucosa:Esophagus_Muscularis:Heart_Atrial_Appendage:Heart_Left_Ventricle:Liver:Lung:Muscle_Skeletal:Nerve_Tibial:Cells_Transformed_fibroblasts:Skin_Not_Sun_Exposed_Suprapubic:Skin_Sun_Exposed_Lower_leg:Small_Intestin…
NUP160	11	47799639	47870107	1.16E-10	11:47406592:C_T;11:47606483:A_G	1.26E-11	Cells_Transformed_fibroblasts:BIOS_eQTL_geneLevel
FNBP4	11	47738072	47788995	7.01E-13	11:47365199:A_G;11:47406592:C_T;11:47606483:A_G	4.42E-19	Muscle_Skeletal:Cells_Transformed_fibroblasts:BIOS_eQTL_geneLevel
MTCH2	11	47638867	47664175	7.01E-13	11:47365199:A_G;11:47406592:C_T;11:47606483:A_G	7.12E-18	Brain_Cortex:Brain_Nucleus_accumbens_basal_ganglia:Esophagus_Muscularis:Muscle_Skeletal:Skin_Sun_Exposed_Lower_leg:Testis:BIOS_eQTL_geneLevel
FAM180B	11	47608198	47610746	7.01E-13	11:47365199:A_G;11:47606483:A_G;11:47406592:C_T	0.00000182	Brain_Cerebellum
MYBPC3	11	47352957	47374253	7.01E-13	11:47365199:A_G;11:47406592:C_T;11:47606483:A_G	1.42E-253	Whole_Blood:Lung:BIOS_eQTL_geneLevel
ACP2	11	47260853	47270457	8.92E-12	11:47365199:A_G;11:47606483:A_G	1.05E-47	Whole_Blood:BIOS_eQTL_geneLevel
PSMC3	11	47440320	47447993	7.01E-13	11:47365199:A_G;11:47406592:C_T;11:47606483:A_G	9.28E-13	Lung:Cells_Transformed_fibroblasts:Skin_Sun_Exposed_Lower_leg:Thyroid:BIOS_eQTL_geneLevel
RAPSN	11	47459308	47470730	7.01E-13	11:47365199:A_G;11:47406592:C_T;11:47606483:A_G	6.26E-22	Skin_Sun_Exposed_Lower_leg:Thyroid:BIOS_eQTL_geneLevel
MADD	11	47290712	47351582	7.01E-13	11:47365199:A_G;11:47606483:A_G	9.36E-08	Breast_Mammary_Tissue:Heart_Left_Ventricle:Pituitary:BIOS_eQTL_geneLevel
SLC39A13	11	47428683	47438047	1.55E-11	11:47365199:A_G;11:47606483:A_G	0.0000111	Artery_Tibial:Esophagus_Muscularis:Nerve_Tibial
NR1H3	11	47269851	47290396	8.92E-12	11:47365199:A_G;11:47406592:C_T;11:47606483:A_G	2.47E-31	BIOS_eQTL_geneLevel
DDB2	11	47236493	47260767	8.92E-12	11:47365199:A_G;11:47606483:A_G	1.06E-10	BIOS_eQTL_geneLevel
LRP4	11	46878419	46940193	6.56E-09	11:47365199:A_G	6.74E-11	Nerve_Tibial
PTPRJ	11	48002113	48189670	3.46E-10	11:47406592:C_T;11:47606483:A_G	1.43E-15	BIOS_eQTL_geneLevel
C11orf49	11	46958240	47185936	0.000000678	11:47365199:A_G	3.97E-08	Testis
CLP1	11	57416465	57429340	4.49E-10	11:57404779:A_G;11:57667222:C_T	6.51E-08	BIOS_eQTL_geneLevel
MED19	11	57471186	57479693	4.49E-10	11:57404779:A_G;11:57667222:C_T	3.38E-59	Adipose_Subcutaneous:Breast_Mammary_Tissue:Esophagus_Mucosa:Heart_Atrial_Appendage:Muscle_Skeletal:Skin_Not_Sun_Exposed_Suprapubic:Skin_Sun_Exposed_Lower_leg:Thyroid:BIOS_eQTL_geneLevel
ZDHHC5	11	57435219	57468659	4.49E-10	11:57404779:A_G;11:57667222:C_T	5.84E-45	Whole_Blood:Lung:Muscle_Skeletal:Nerve_Tibial:BIOS_eQTL_geneLevel
TMX2	11	57480072	57508445	4.49E-10	11:57404779:A_G;11:57667222:C_T	8.16E-68	BIOS_eQTL_geneLevel
SERPING1	11	57364860	57382326	2.63E-09	11:57404779:A_G;11:57667222:C_T	7.01E-42	BIOS_eQTL_geneLevel
YPEL4	11	57412560	57417417	1.48E-09	11:57404779:A_G;11:57667222:C_T	8.13E-08	BIOS_eQTL_geneLevel
SMTNL1	11	57308979	57318108	0.000000004	11:57404779:A_G	0.00000275	BIOS_eQTL_geneLevel
TIMM10	11	57295936	57298276	4.49E-10	11:57404779:A_G;11:57667222:C_T	1.05E-35	Adipose_Subcutaneous:Adipose_Visceral_Omentum:Artery_Tibial:Esophagus_Mucosa:Esophagus_Muscularis:Heart_Atrial_Appendage:Lung:Muscle_Skeletal:Nerve_Tibial:Pancreas:Skin_Sun_Exposed_Lower_leg:Stomach:Thyroid:BIOS_eQTL_geneLevel
HNRNPUL2-BSCL2	11	62457747	62494856	4.31E-10	11:62697813:G_T	1.93E-25	BIOS_eQTL_geneLevel
NXF1	11	62559595	62573774	4.31E-10	11:62697813:G_T	1.72E-14	BIOS_eQTL_geneLevel
B3GAT3	11	62382768	62389647	4.31E-10	11:62697813:G_T	0.00000445	Cells_Transformed_fibroblasts
BSCL2	11	62457747	62477317	4.31E-10	11:62697813:G_T	1.93E-25	BIOS_eQTL_geneLevel
TTC9C	11	62495541	62507765	4.31E-10	11:62697813:G_T	5.04E-32	Cells_Transformed_fibroblasts:BIOS_eQTL_geneLevel
METTL12	11	62432781	62435968	6.35E-10	11:62697813:G_T	0.000000101	BIOS_eQTL_geneLevel
C11orf48	11	62430287	62439727	6.35E-10	11:62697813:G_T	0.000000101	BIOS_eQTL_geneLevel
INTS5	11	62414320	62420774	6.35E-10	11:62697813:G_T	1.11E-11	BIOS_eQTL_geneLevel
CCDC87	11	66357640	66360554	1.18E-10	11:66328095:C_T;11:66328741:A_C;11:66401373:G_T;11:66274958:A_C	1.06E-107	BIOS_eQTL_geneLevel
CTSF	11	66330934	66336312	1.18E-10	11:66328741:A_C;11:66274958:A_C;11:66328095:C_T;11:66401373:G_T	2.83E-201	Adipose_Subcutaneous:Whole_Blood:Artery_Aorta:Artery_Tibial:Esophagus_Mucosa:Esophagus_Muscularis:Lung:Nerve_Tibial:Cells_Transformed_fibroblasts:Skin_Sun_Exposed_Lower_leg:Thyroid:BIOS_eQTL_geneLevel
CCS	11	66360292	66373490	1.18E-10	11:66328095:C_T;11:66328741:A_C;11:66401373:G_T;11:66274958:A_C	3.27167000000001e-310	Cells_EBV-transformed_lymphocytes:Whole_Blood:Spleen:BIOS_eQTL_geneLevel
DPP3	11	66247484	66277130	1.18E-10	11:66274958:A_C;11:66328095:C_T;11:66328741:A_C;11:66401373:G_T	7.51E-48	Adipose_Subcutaneous:Adipose_Visceral_Omentum:Whole_Blood:Artery_Aorta:Artery_Tibial:Breast_Mammary_Tissue:Esophagus_Mucosa:Esophagus_Muscularis:Heart_Left_Ventricle:Lung:Muscle_Skeletal:Nerve_Tibial:Pancreas:Cells_Transformed_fibroblasts:Skin_Not_Sun_Exposed_Suprapubic:Skin_Sun_Exposed_Lower_leg:Stomach:Thyroid:BIOS_eQTL_geneLevel
PELI3	11	66234216	66244808	1.18E-10	11:66041079:A_G;11:66058082:G_T;11:66274958:A_C;11:66328095:C_T;11:66328741:A_C;11:66401373:G_T	5.86E-90	Whole_Blood:BIOS_eQTL_geneLevel
ZDHHC24	11	66288108	66313709	1.18E-10	11:66274958:A_C;11:66328095:C_T;11:66328741:A_C;11:66401373:G_T	4.68E-48	Artery_Aorta:Brain_Cerebellar_Hemisphere:Muscle_Skeletal:BIOS_eQTL_geneLevel
PC	11	66615704	66725847	1.18E-10	11:66328095:C_T;11:66328741:A_C;11:66401373:G_T;11:66650501:A_G	1.39E-59	BIOS_eQTL_geneLevel
PACS1	11	65837834	66012218	1.48E-12	11:66041079:A_G;11:66058082:G_T;11:65969091:C_T	9.1E-37	Whole_Blood:BIOS_eQTL_geneLevel
BBS1	11	66278077	66301098	1.18E-10	11:66274958:A_C;11:66328095:C_T;11:66328741:A_C;11:66401373:G_T	4.68E-48	BIOS_eQTL_geneLevel
KLC2	11	66024765	66035331	7.62E-10	11:66041079:A_G;11:66058082:G_T;11:66274958:A_C;11:66328741:A_C	2.87E-10	Esophagus_Mucosa:Lung:Muscle_Skeletal:Cells_Transformed_fibroblasts:Skin_Sun_Exposed_Lower_leg:BIOS_eQTL_geneLevel
MRPL11	11	66202546	66234209	0.000000339	11:66328095:C_T;11:66274958:A_C	0.0000319	BIOS_eQTL_geneLevel
RP11-867G23.8	11	66115421	66132275	0.000000122	11:66328095:C_T	0.00000419	Esophagus_Mucosa:BIOS_eQTL_geneLevel
YIF1A	11	66052051	66056641	2.33E-09	11:66058082:G_T	0.0000149	Pancreas:BIOS_eQTL_geneLevel
SF3B2	11	65818200	65836779	1.48E-12	11:66041079:A_G;11:66058082:G_T	1.11E-09	Heart_Left_Ventricle:BIOS_eQTL_geneLevel
TMEM151A	11	66059341	66064135	1.73E-09	11:66058082:G_T	0.000019	Cells_Transformed_fibroblasts
SLC29A2	11	66129992	66139685	0.000000284	11:66328095:C_T	0.0000398	BIOS_eQTL_geneLevel
PTPRCAP	11	67202981	67205538	1.05E-09	11:66328741:A_C;11:66650501:A_G	0.00000111	Thyroid
LRFN4	11	66624118	66627946	1.18E-10	11:66328095:C_T;11:66328741:A_C;11:66401373:G_T;11:66650501:A_G	1.39E-59	BIOS_eQTL_geneLevel
C11orf80	11	66511922	66610987	1.18E-10	11:66328095:C_T;11:66401373:G_T	2.27E-11	BIOS_eQTL_geneLevel
RAB1B	11	66036004	66044963	7.62E-10	11:66041079:A_G;11:66058082:G_T	3.4E-09	BIOS_eQTL_geneLevel
EIF1AD	11	65764016	65769647	5.11E-10	11:65969091:C_T	0.000000818	BIOS_eQTL_geneLevel
BANF1	11	65769550	65771620	5.11E-10	11:65969091:C_T	1.58E-16	Cells_Transformed_fibroblasts:BIOS_eQTL_geneLevel
RIN1	11	66097713	66104311	1.48E-12	11:65969091:C_T;11:66041079:A_G;11:66058082:G_T;11:66274958:A_C;11:66328095:C_T;11:66401373:G_T	1.7E-24	BIOS_eQTL_geneLevel
RCE1	11	66610306	66614017	1.18E-10	11:66328095:C_T;11:66401373:G_T	1.53E-10	BIOS_eQTL_geneLevel
ARAP1	11	72396114	72504644	5.59E-12	11:72323888:G_T;11:72341342:A_G;11:72348039:A_G;11:72394706:A_G	3.88E-19	Esophagus_Mucosa:Skin_Not_Sun_Exposed_Suprapubic:BIOS_eQTL_geneLevel
PDE2A	11	72287185	72385635	5.59E-12	11:72323888:G_T;11:72340686:C_G;11:72341342:A_G;11:72348039:A_G;11:72394706:A_G	1.19E-35	Brain_Cerebellar_Hemisphere:Brain_Cerebellum:BIOS_eQTL_geneLevel
STARD10	11	72465774	72504726	5.59E-12	11:72323888:G_T;11:72340686:C_G;11:72341342:A_G;11:72348039:A_G;11:72394706:A_G	2.23E-143	Adipose_Subcutaneous:Whole_Blood:Esophagus_Muscularis:Heart_Atrial_Appendage:Heart_Left_Ventricle:Muscle_Skeletal:Nerve_Tibial:Cells_Transformed_fibroblasts:Thyroid:BIOS_eQTL_geneLevel
ATG16L2	11	72525353	72554719	5.59E-12	11:72341342:A_G;11:72348039:A_G;11:72394706:A_G	8.63E-14	Pituitary:BIOS_eQTL_geneLevel
FCHSD2	11	72547790	72853306	5.59E-12	11:72341342:A_G;11:72348039:A_G;11:72394706:A_G	8.63E-14	BIOS_eQTL_geneLevel
DNAJB13	11	73661364	73681411	8.09E-09	11:73455292:A_C	3.64E-38	Testis:BIOS_eQTL_geneLevel
MRPL48	11	73498361	73576178	8.09E-09	11:73455292:A_C	1.25E-131	Whole_Blood:Esophagus_Mucosa:Nerve_Tibial:Pancreas:Testis:BIOS_eQTL_geneLevel
PLEKHB1	11	73357223	73373864	9.76E-08	11:73455292:A_C	0.00001	BIOS_eQTL_geneLevel
RAB6A	11	73386683	73472182	8.09E-09	11:73455292:A_C	4.8E-115	Brain_Cerebellum:Skin_Sun_Exposed_Lower_leg:Testis:BIOS_eQTL_geneLevel
PAAF1	11	73587744	73638790	8.09E-09	11:73455292:A_C	1.37E-42	Artery_Aorta:Artery_Tibial:Nerve_Tibial:Pituitary:Cells_Transformed_fibroblasts:BIOS_eQTL_geneLevel
P4HA3	11	73946846	74022702	0.00000137	11:73455292:A_C	0.00000671	Thyroid
UCP2	11	73685712	73694352	8.09E-09	11:73455292:A_C	9.9E-90	Whole_Blood:Testis:BIOS_eQTL_geneLevel
ARHGEF17	11	73019334	73080136	0.000000171	11:73455292:A_C	0.00000225	Brain_Cerebellum
ANKRD42	11	82904781	82971736	2.26E-08	11:83277325:C_T	3.21E-51	Artery_Tibial:BIOS_eQTL_geneLevel
CCDC90B	11	82970139	82997450	2.26E-08	11:83277325:C_T	0.00000004	Artery_Tibial:Pancreas:BIOS_eQTL_geneLevel
CNTN5	11	98891683	100229616	4.7E-09	11:99068364:A_G;11:99126016:A_G	0.000000829	Artery_Aorta
COPS7A	12	6832907	6841041	5.37E-11	12:6873818:A_G	9.48E-10	Artery_Aorta:Artery_Tibial:Nerve_Tibial:Thyroid
MLF2	12	6857170	6876641	5.37E-11	12:6873818:A_G	0.000000244	Adipose_Subcutaneous
ZNF384	12	6775643	6798738	0.000000567	12:6873818:A_G	0.0000084	BIOS_eQTL_geneLevel
GPR162	12	6930711	6939136	5.37E-11	12:6873818:A_G	0.000000153	BIOS_eQTL_geneLevel
NAB2	12	57482677	57489259	1.61E-09	12:57273289:A_G;12:57487814:A_C	1.56E-47	BIOS_eQTL_geneLevel
STAT6	12	57489191	57525922	1.61E-09	12:57273289:A_G;12:57487814:A_C	1.56E-47	Artery_Tibial:Skin_Sun_Exposed_Lower_leg:BIOS_eQTL_geneLevel
HELB	12	66696325	66737423	0.000000741	12:66367726:C_T	0.00000635	Esophagus_Muscularis
KCTD10	12	109886461	109915349	1.51E-08	12:109982578:A_T	2E-18	Colon_Transverse:Cells_Transformed_fibroblasts:BIOS_eQTL_geneLevel
UBE3B	12	109915207	109974507	1.51E-08	12:109982578:A_T	7.02E-15	Colon_Transverse:Esophagus_Mucosa:Esophagus_Muscularis:Cells_Transformed_fibroblasts:BIOS_eQTL_geneLevel
MYO1H	12	109785708	109893328	1.51E-08	12:109982578:A_T	2.72E-13	Lung:Thyroid
MMAB	12	109991542	110011679	1.51E-08	12:109982578:A_T	1.74E-47	Adipose_Subcutaneous:Heart_Left_Ventricle:Muscle_Skeletal:Nerve_Tibial:BIOS_eQTL_geneLevel
MVK	12	110011060	110035067	1.51E-08	12:109982578:A_T	2.17E-26	Skin_Sun_Exposed_Lower_leg:BIOS_eQTL_geneLevel
FOXN4	12	109715784	109747025	1.51E-08	12:109982578:A_T	5.55E-11	Skin_Not_Sun_Exposed_Suprapubic:Skin_Sun_Exposed_Lower_leg
UNG	12	109535379	109548797	0.000000666	12:109982578:A_T	3.12E-08	Skin_Sun_Exposed_Lower_leg
VSIG10	12	118501398	118573831	6.47E-10	12:118385788:G_T;12:118399491:A_T;12:118403547:C_T;12:118414697:A_G	5.04E-08	BIOS_eQTL_geneLevel
WSB2	12	118470712	118500235	6.47E-10	12:118385788:G_T;12:118399491:A_T;12:118403547:C_T	5.61E-13	BIOS_eQTL_geneLevel
RFC5	12	118451393	118470935	6.47E-10	12:118385788:G_T;12:118399491:A_T;12:118403547:C_T	1.53E-09	BIOS_eQTL_geneLevel
ABCB9	12	123405498	123466196	1.74E-13	12:123600086:C_G;12:123856998:A_G;12:123404966:A_C;12:123558705:C_T	5.68E-128	Whole_Blood:Artery_Tibial:Colon_Sigmoid:Colon_Transverse:Esophagus_Mucosa:Esophagus_Muscularis:Heart_Atrial_Appendage:Heart_Left_Ventricle:Liver:Lung:Nerve_Tibial:Cells_Transformed_fibroblasts:Skin_Not_Sun_Exposed_Suprapubic:Skin_Sun_Exposed_Lower_leg:Testis:BIOS_eQTL_geneLevel
PITPNM2	12	123468027	123634562	1.74E-13	12:123558705:C_T;12:123600086:C_G;12:123856998:A_G;12:123404966:A_C	1.09E-14	Artery_Tibial:Brain_Cerebellar_Hemisphere:Thyroid:BIOS_eQTL_geneLevel
OGFOD2	12	123459127	123464590	1.74E-13	12:123600086:C_G;12:123856998:A_G;12:123404966:A_C;12:123558705:C_T	1.41E-23	Brain_Hypothalamus:Cells_Transformed_fibroblasts:BIOS_eQTL_geneLevel
CDK2AP1	12	123745528	123756881	1.74E-13	12:123558705:C_T;12:123600086:C_G;12:123856998:A_G;12:123404966:A_C	1.22E-65	Adipose_Subcutaneous:Adipose_Visceral_Omentum:Whole_Blood:Artery_Aorta:Artery_Tibial:Breast_Mammary_Tissue:Colon_Sigmoid:Colon_Transverse:Esophagus_Gastroesophageal_Junction:Esophagus_Mucosa:Esophagus_Muscularis:Lung:Nerve_Tibial:Pancreas:Cells_Transformed_fibroblasts:Skin_Not_Sun_Exposed_Suprapubic:Skin_Sun_Exposed_Lower_leg:Stomach:Testis:Thyroid:BIOS_eQTL_geneLevel
C12orf65	12	123717463	123742506	1.74E-13	12:123558705:C_T;12:123600086:C_G;12:123856998:A_G	2.9E-09	Adipose_Subcutaneous:Adipose_Visceral_Omentum:Artery_Aorta:Colon_Sigmoid:Esophagus_Muscularis:Nerve_Tibial:Cells_Transformed_fibroblasts:BIOS_eQTL_geneLevel
ARL6IP4	12	123464607	123467456	1.74E-13	12:123600086:C_G;12:123856998:A_G;12:123404966:A_C;12:123558705:C_T	1.86E-51	Brain_Nucleus_accumbens_basal_ganglia:Esophagus_Mucosa:Lung:Pancreas:Cells_Transformed_fibroblasts:Testis:BIOS_eQTL_geneLevel
MPHOSPH9	12	123636867	123728561	1.74E-13	12:123558705:C_T;12:123600086:C_G;12:123856998:A_G	2.27E-38	Whole_Blood:Artery_Tibial:Esophagus_Muscularis:Heart_Atrial_Appendage:Heart_Left_Ventricle:Nerve_Tibial:Skin_Sun_Exposed_Lower_leg:Stomach:Testis:Thyroid:BIOS_eQTL_geneLevel
RILPL2	12	123899936	123921264	5.76E-13	12:123600086:C_G;12:123856998:A_G	0.0000086	Cells_Transformed_fibroblasts:BIOS_eQTL_geneLevel
SETD8	12	123868320	123893905	1.74E-13	12:123558705:C_T;12:123600086:C_G;12:123856998:A_G	4.58E-93	Whole_Blood:Artery_Tibial:Brain_Cerebellum:Muscle_Skeletal:Nerve_Tibial:Pancreas:Cells_Transformed_fibroblasts:Thyroid:BIOS_eQTL_geneLevel
SBNO1	12	123773656	123849390	1.74E-13	12:123600086:C_G;12:123856998:A_G	0.000000185	BIOS_eQTL_geneLevel
SNRNP35	12	123942188	123957701	1.14E-08	12:123856998:A_G	0.0000288	BIOS_eQTL_geneLevel
DNAH10	12	124247042	124420753	1.16E-12	12:123600086:C_G;12:123856998:A_G	0.00000231	Brain_Cerebellum
HCAR1	12	123104824	123215390	2.09E-08	12:123404966:A_C	2.15E-08	BIOS_eQTL_geneLevel
RILPL1	12	123955925	124018265	1.14E-08	12:123856998:A_G	0.0000288	BIOS_eQTL_geneLevel
VPS33A	12	122714111	122751068	2.09E-08	12:123404966:A_C	0.00000792	Esophagus_Mucosa
VPS37B	12	123349882	123380991	2.09E-08	12:123404966:A_C	0.00000407	BIOS_eQTL_geneLevel
HCAR3	12	123199303	123201439	3.31E-08	12:123558705:C_T	7.13E-08	BIOS_eQTL_geneLevel
HIP1R	12	123319000	123347507	2.09E-08	12:123404966:A_C	0.0000013	BIOS_eQTL_geneLevel
OLFM4	13	53602894	53626192	3.66E-28	13:53608951:G_T;13:53635837:G_T;13:53643370:A_C;13:53646726:C_T;13:53752731:A_T;13:53817443:C_T;13:53857542:C_T;13:53888526:A_T;13:53613990:A_G;13:53792827:A_T	9.49E-14	Artery_Aorta:Nerve_Tibial:BIOS_eQTL_geneLevel
CKAP2	13	53029564	53050763	6.23E-29	13:53876897:A_G;13:53894606:A_G;13:53928521:A_T	0.00000392	Brain_Cerebellum
PCDH8	13	53418109	53422775	1.39E-10	13:53608951:G_T	0.000000499	Nerve_Tibial
DIAPH3	13	60239717	60738121	1.38E-10	13:60362013:A_G;13:60532796:C_T;13:60670489:A_G	1.78E-08	Adipose_Visceral_Omentum
HS6ST3	13	96743093	97485671	2.03E-10	13:96922716:C_T;13:96932868:A_C;13:97048568:G_T	2.11E-14	Adipose_Subcutaneous:Artery_Aorta:Artery_Tibial
UGGT2	13	96453834	96705736	2.03E-10	13:96922716:C_T;13:96932868:A_C;13:97048568:G_T	2.85E-13	Artery_Aorta:Breast_Mammary_Tissue:Esophagus_Mucosa:Esophagus_Muscularis:Lung:Muscle_Skeletal:Nerve_Tibial:Pancreas:Cells_Transformed_fibroblasts:Skin_Not_Sun_Exposed_Suprapubic:Skin_Sun_Exposed_Lower_leg:Stomach
DNAJC3	13	96329393	96447243	2.03E-10	13:96922716:C_T;13:96932868:A_C	5.62E-10	Adipose_Subcutaneous:Adipose_Visceral_Omentum:Artery_Tibial:Nerve_Tibial:Pancreas:Cells_Transformed_fibroblasts:Skin_Sun_Exposed_Lower_leg:Thyroid
CLDN10	13	96085858	96232013	0.000000237	13:96922716:C_T;13:97048568:G_T	0.00000442	Colon_Sigmoid
TEX29	13	111968531	111996596	6.04E-09	13:111982291:C_T	1.01E-12	Brain_Anterior_cingulate_cortex_BA24:Brain_Caudate_basal_ganglia:Brain_Cortex:Brain_Frontal_Cortex_BA9:Brain_Nucleus_accumbens_basal_ganglia
ARHGEF7	13	111766906	111958084	6.04E-09	13:111982291:C_T	1.57E-08	BIOS_eQTL_geneLevel
RASGRP1	15	38780304	38857776	4.42E-13	15:38897857:C_T;15:38899190:C_T;15:38846678:C_T;15:38867914:C_T	1.79E-43	Cells_EBV-transformed_lymphocytes:Esophagus_Mucosa:Skin_Not_Sun_Exposed_Suprapubic:Skin_Sun_Exposed_Lower_leg:Spleen:Testis:BIOS_eQTL_geneLevel
TCF12	15	57210821	57591479	7.85E-12	15:57215867:A_G	2.98E-14	BIOS_eQTL_geneLevel
CGNL1	15	57668165	57842925	2.11E-10	15:57215867:A_G	0.0000083	BIOS_eQTL_geneLevel
DIS3L	15	66585555	66626236	0.000000018	15:66709386:C_G	3.01E-18	Adipose_Subcutaneous:Adipose_Visceral_Omentum:Artery_Aorta:Artery_Tibial:Breast_Mammary_Tissue:Esophagus_Mucosa:Esophagus_Muscularis:Lung:Muscle_Skeletal:Nerve_Tibial:Stomach:Thyroid:BIOS_eQTL_geneLevel
TIPIN	15	66628544	66679084	0.000000018	15:66709386:C_G	3.6E-47	Adipose_Subcutaneous:Adipose_Visceral_Omentum:Adrenal_Gland:Whole_Blood:Artery_Aorta:Artery_Coronary:Artery_Tibial:Brain_Anterior_cingulate_cortex_BA24:Brain_Caudate_basal_ganglia:Brain_Cerebellar_Hemisphere:Brain_Cerebellum:Brain_Cortex:Brain_Frontal_Cortex_BA9:Brain_Hippocampus:Brain_Hypothalamus:Brain_Nucleus_accumbens_basal_ganglia:Brain_Putamen_basal_ganglia:Breast_Mammary_Tissue:Colon_Sigmo…
ZWILCH	15	66797297	66842115	0.000000022	15:66709386:C_G	0.000000367	Brain_Frontal_Cortex_BA9
MAP2K1	15	66679155	66784650	0.000000018	15:66709386:C_G	0.000000941	Skin_Sun_Exposed_Lower_leg:Testis
RPL4	15	66790355	66816870	3.51E-08	15:66709386:C_G	0.0000131	BIOS_eQTL_geneLevel
C15orf59	15	74032141	74045088	2.47E-10	15:74012409:C_T;15:74052756:C_T	0.00000464	Cells_Transformed_fibroblasts
PML	15	74287014	74340153	2.97E-08	15:74282343:C_T;15:74331659:A_C	1.5E-10	Whole_Blood:Cells_Transformed_fibroblasts:BIOS_eQTL_geneLevel
STOML1	15	74275547	74286963	9.28E-10	15:74052756:C_T;15:74282343:C_T;15:74331659:A_C	1.53E-55	Whole_Blood:Nerve_Tibial:BIOS_eQTL_geneLevel
POLG	15	89859534	89878092	9.49E-09	15:89913632:G_T	9.85E-11	Adipose_Subcutaneous:Artery_Aorta:Artery_Tibial:Colon_Sigmoid:Esophagus_Gastroesophageal_Junction:Esophagus_Muscularis:Muscle_Skeletal:Nerve_Tibial:BIOS_eQTL_geneLevel
FANCI	15	89787180	89860492	9.49E-09	15:89913632:G_T	0.00000347	BIOS_eQTL_geneLevel
FES	15	91426925	91439006	6.78E-16	15:91420973:C_T;15:91426560:A_G	8.85E-97	Adipose_Subcutaneous:Adipose_Visceral_Omentum:Artery_Aorta:Artery_Tibial:Breast_Mammary_Tissue:Lung:Nerve_Tibial:Pancreas:Cells_Transformed_fibroblasts:Skin_Sun_Exposed_Lower_leg:Thyroid:BIOS_eQTL_geneLevel
FURIN	15	91411822	91426688	6.78E-16	15:91420973:C_T;15:91426560:A_G	1.19E-09	Esophagus_Mucosa:BIOS_eQTL_geneLevel
VPS33B	15	91541646	91565833	6.78E-16	15:91426560:A_G	0.0000103	BIOS_eQTL_geneLevel
IGF1R	15	99192200	99507759	5.19E-09	15:99183876:C_T;15:99202875:C_T	0.00000003	Cells_Transformed_fibroblasts
CCDC78	16	772582	776954	9.73E-10	16:715164:A_G;16:757891:C_T;16:777129:A_G	7.32E-34	Artery_Aorta:Artery_Tibial:Brain_Cerebellar_Hemisphere:Brain_Cerebellum:Brain_Frontal_Cortex_BA9:Nerve_Tibial:BIOS_eQTL_geneLevel
WDR90	16	699311	717833	9.73E-10	16:715164:A_G;16:757891:C_T;16:777129:A_G	1.16E-31	Testis:BIOS_eQTL_geneLevel
NARFL	16	779753	791329	9.73E-10	16:715164:A_G;16:757891:C_T;16:777129:A_G	3.86E-112	Adipose_Subcutaneous:Adipose_Visceral_Omentum:Esophagus_Mucosa:Esophagus_Muscularis:Lung:Skin_Not_Sun_Exposed_Suprapubic:Skin_Sun_Exposed_Lower_leg:Thyroid:BIOS_eQTL_geneLevel
FAM173A	16	770581	772601	9.73E-10	16:715164:A_G;16:757891:C_T;16:777129:A_G	3.58E-09	BIOS_eQTL_geneLevel
HAGHL	16	776936	785525	9.73E-10	16:715164:A_G;16:757891:C_T;16:777129:A_G	3.86E-112	Artery_Aorta:Artery_Tibial:Brain_Cerebellar_Hemisphere:Brain_Cerebellum:BIOS_eQTL_geneLevel
RHOT2	16	718086	724174	9.73E-10	16:715164:A_G;16:757891:C_T;16:777129:A_G	6.23E-09	Testis:BIOS_eQTL_geneLevel
STUB1	16	730224	732870	2.05E-09	16:757891:C_T;16:777129:A_G	1.32E-13	BIOS_eQTL_geneLevel
WFIKKN1	16	679239	684116	9.73E-10	16:715164:A_G;16:757891:C_T;16:777129:A_G	4.52E-27	Adipose_Subcutaneous:Adipose_Visceral_Omentum:Whole_Blood:Artery_Aorta:Artery_Tibial:Brain_Caudate_basal_ganglia:Brain_Cerebellar_Hemisphere:Brain_Frontal_Cortex_BA9:Brain_Putamen_basal_ganglia:Colon_Transverse:Esophagus_Mucosa:Esophagus_Muscularis:Lung:Muscle_Skeletal:Nerve_Tibial:Prostate:Skin_Not_Sun_Exposed_Suprapubic:Skin_Sun_Exposed_Lower_leg:Stomach:Testis:Thyroid:BIOS_eQTL_geneLevel
FBXL16	16	742500	755829	9.73E-10	16:715164:A_G;16:757891:C_T;16:777129:A_G	2.18E-10	BIOS_eQTL_geneLevel
JMJD8	16	731671	734529	2.05E-09	16:757891:C_T;16:777129:A_G	1.32E-13	Nerve_Tibial:BIOS_eQTL_geneLevel
MSLNL	16	819428	833370	9.73E-10	16:715164:A_G;16:777129:A_G	0.000000989	BIOS_eQTL_geneLevel
NME4	16	446725	460367	5.44E-09	16:715164:A_G	0.000042	BIOS_eQTL_geneLevel
RAB40C	16	639357	679272	9.73E-10	16:715164:A_G;16:757891:C_T;16:777129:A_G	4.52E-27	Artery_Tibial:Nerve_Tibial:Thyroid:BIOS_eQTL_geneLevel
PDIA2	16	333152	337215	2.28E-08	16:777129:A_G	0.000000311	Uterus
METRN	16	765115	769655	9.73E-10	16:715164:A_G;16:757891:C_T;16:777129:A_G	4.9E-24	BIOS_eQTL_geneLevel
WDR24	16	734622	740444	9.73E-10	16:715164:A_G;16:757891:C_T;16:777129:A_G	1.77E-43	Whole_Blood:BIOS_eQTL_geneLevel
C16orf13	16	684429	686358	9.73E-10	16:715164:A_G;16:757891:C_T;16:777129:A_G	2.47E-50	Adipose_Subcutaneous:Adipose_Visceral_Omentum:Whole_Blood:Artery_Aorta:Artery_Tibial:Breast_Mammary_Tissue:Colon_Transverse:Esophagus_Gastroesophageal_Junction:Esophagus_Mucosa:Esophagus_Muscularis:Lung:Nerve_Tibial:Ovary:Cells_Transformed_fibroblasts:Thyroid:BIOS_eQTL_geneLevel
FAM195A	16	691813	698474	2.3E-09	16:715164:A_G	0.0000696	BIOS_eQTL_geneLevel
RHBDL1	16	725666	728268	9.73E-10	16:715164:A_G;16:757891:C_T;16:777129:A_G	2.84E-19	Adipose_Subcutaneous:Adipose_Visceral_Omentum:Cells_EBV-transformed_lymphocytes:Whole_Blood:Artery_Aorta:Artery_Tibial:Breast_Mammary_Tissue:Colon_Sigmoid:Esophagus_Mucosa:Esophagus_Muscularis:Lung:Muscle_Skeletal:Nerve_Tibial:Cells_Transformed_fibroblasts:Skin_Sun_Exposed_Lower_leg:Testis:Thyroid:Uterus:BIOS_eQTL_geneLevel
PIGQ	16	616995	634136	2.05E-09	16:715164:A_G;16:757891:C_T;16:777129:A_G	0.000000195	Brain_Cortex:Colon_Transverse:Testis:BIOS_eQTL_geneLevel
RAB11FIP3	16	475619	573011	1.82E-09	16:715164:A_G	0.000027	BIOS_eQTL_geneLevel
C16orf72	16	9185505	9215497	1.93E-08	16:9191790:C_T	0.0000691	BIOS_eQTL_geneLevel
IQCK	16	19727778	19868907	2.18E-12	16:19876092:C_T;16:19904344:A_T	0.0000522	BIOS_eQTL_geneLevel
GPRC5B	16	19868616	19897489	3.1E-12	16:19904344:A_T;16:19876092:C_T	0.000000166	Adipose_Subcutaneous:Lung:Skin_Sun_Exposed_Lower_leg:BIOS_eQTL_geneLevel
KNOP1	16	19714902	19729557	2.18E-12	16:19876092:C_T;16:19904344:A_T;16:20006745:C_G;16:20059843:A_T	3E-113	Adipose_Subcutaneous:Adipose_Visceral_Omentum:Adrenal_Gland:Cells_EBV-transformed_lymphocytes:Whole_Blood:Artery_Aorta:Artery_Coronary:Artery_Tibial:Brain_Caudate_basal_ganglia:Brain_Cerebellar_Hemisphere:Brain_Cerebellum:Brain_Cortex:Brain_Frontal_Cortex_BA9:Brain_Hypothalamus:Brain_Nucleus_accumbens_basal_ganglia:Brain_Putamen_basal_ganglia:Breast_Mammary_Tissue:Colon_Sigmoid:Colon_Transverse:E…
GDE1	16	19513015	19533467	1.88E-08	16:19876092:C_T	0.00000371	Brain_Cerebellar_Hemisphere
ACSM5	16	20420856	20452658	2.2E-09	16:19876092:C_T;16:19904344:A_T	0.0000214	Thyroid
C16orf62	16	19566562	19718115	2.18E-12	16:19876092:C_T;16:19904344:A_T	3E-113	Nerve_Tibial:BIOS_eQTL_geneLevel
TMEM219	16	29952206	29984373	6.32E-09	16:29978827:A_G	0.00000112	Cells_Transformed_fibroblasts
INO80E	16	30006615	30017114	6.32E-09	16:29978827:A_G	2.46E-196	Adipose_Subcutaneous:Adipose_Visceral_Omentum:Adrenal_Gland:Whole_Blood:Artery_Aorta:Artery_Tibial:Brain_Cerebellum:Breast_Mammary_Tissue:Colon_Transverse:Esophagus_Gastroesophageal_Junction:Esophagus_Mucosa:Esophagus_Muscularis:Heart_Atrial_Appendage:Heart_Left_Ventricle:Lung:Nerve_Tibial:Ovary:Pituitary:Prostate:Cells_Transformed_fibroblasts:Skin_Not_Sun_Exposed_Suprapubic:Skin_Sun_Exposed_Lowe…
PPP4C	16	30087299	30096698	6.32E-09	16:29978827:A_G	0.00000373	Cells_Transformed_fibroblasts:BIOS_eQTL_geneLevel
GDPD3	16	30116131	30125177	6.32E-09	16:29978827:A_G	1.16E-80	Adrenal_Gland:Whole_Blood:BIOS_eQTL_geneLevel
FAM57B	16	30035748	30064299	6.32E-09	16:29978827:A_G	6.34E-14	Muscle_Skeletal
DOC2A	16	30016830	30034591	6.32E-09	16:29978827:A_G	3.98E-59	Artery_Aorta:Colon_Transverse:Esophagus_Mucosa:Thyroid:BIOS_eQTL_geneLevel
CDIPT	16	29869678	29875057	7.43E-09	16:29978827:A_G	0.0000456	BIOS_eQTL_geneLevel
RP11-345J4.5	16	29454551	29465972	7.23E-08	16:29978827:A_G	0.00000954	Brain_Cerebellar_Hemisphere
CORO1A	16	30194148	30200397	6.32E-09	16:29978827:A_G	3.39E-13	BIOS_eQTL_geneLevel
KCTD13	16	29916333	29938356	6.32E-09	16:29978827:A_G	7.67E-14	BIOS_eQTL_geneLevel
ASPHD1	16	29911696	29931185	6.32E-09	16:29978827:A_G	7.67E-14	BIOS_eQTL_geneLevel
SLX1A	16	30205208	30208882	0.00000021	16:29978827:A_G	0.00000702	BIOS_eQTL_geneLevel
MAPK3	16	30125426	30134827	6.32E-09	16:29978827:A_G	1.88E-139	Cells_EBV-transformed_lymphocytes:Whole_Blood:Cells_Transformed_fibroblasts:BIOS_eQTL_geneLevel
RP11-347C12.1	16	30234258	30265831	6.32E-09	16:29978827:A_G	3.35E-52	Adipose_Subcutaneous:Artery_Tibial:Esophagus_Gastroesophageal_Junction:Lung:Muscle_Skeletal:Nerve_Tibial:Pancreas:Cells_Transformed_fibroblasts:Skin_Not_Sun_Exposed_Suprapubic:Skin_Sun_Exposed_Lower_leg:Thyroid:BIOS_eQTL_geneLevel
BOLA2B	16	30204255	30205627	0.00000021	16:29978827:A_G	0.0000481	BIOS_eQTL_geneLevel
SULT1A3	16	30205754	30215631	0.00000021	16:29978827:A_G	0.00000702	BIOS_eQTL_geneLevel
TBX6	16	30097114	30103208	6.32E-09	16:29978827:A_G	1.64E-70	Cells_EBV-transformed_lymphocytes:Whole_Blood:Artery_Aorta:Artery_Tibial:Esophagus_Muscularis:Heart_Left_Ventricle:Lung:Muscle_Skeletal:Nerve_Tibial:Prostate:Cells_Transformed_fibroblasts:Skin_Sun_Exposed_Lower_leg:Spleen:Thyroid:Uterus:BIOS_eQTL_geneLevel
NPIPB11	16	29392675	29415350	6.32E-09	16:29978827:A_G	0.00000119	Lung:Cells_Transformed_fibroblasts
YPEL3	16	30103635	30108236	6.32E-09	16:29978827:A_G	4.41E-139	Adipose_Subcutaneous:Adipose_Visceral_Omentum:Whole_Blood:Artery_Aorta:Artery_Tibial:Brain_Cerebellar_Hemisphere:Brain_Cerebellum:Breast_Mammary_Tissue:Colon_Transverse:Esophagus_Mucosa:Esophagus_Muscularis:Heart_Atrial_Appendage:Heart_Left_Ventricle:Lung:Nerve_Tibial:Pancreas:Skin_Not_Sun_Exposed_Suprapubic:Skin_Sun_Exposed_Lower_leg:Spleen:Stomach:Thyroid:BIOS_eQTL_geneLevel
MVP	16	29831715	29859355	7.43E-09	16:29978827:A_G	1.87E-11	BIOS_eQTL_geneLevel
SALL1	16	51169886	51185278	2.51E-14	16:51177517:A_G	2.66E-09	Testis
GNAO1	16	56225302	56391356	1.11E-12	16:56090503:C_T;16:56128782:C_T;16:56146367:A_G;16:56347472:G_T;16:56352854:A_C;16:56357745:G_T;16:56361557:C_T	6.96E-49	Artery_Aorta:Artery_Tibial:Esophagus_Muscularis:Testis:BIOS_eQTL_geneLevel
AMFR	16	56395364	56459450	1.97E-12	16:56128782:C_T;16:56347472:G_T;16:56352854:A_C;16:56357745:G_T;16:56361557:C_T	5.24E-40	BIOS_eQTL_geneLevel
BBS2	16	56500748	56554195	1.71E-11	16:56128782:C_T;16:56347472:G_T;16:56352854:A_C;16:56357745:G_T;16:56361557:C_T	1.13E-71	Adipose_Subcutaneous:Artery_Aorta:Muscle_Skeletal:Skin_Sun_Exposed_Lower_leg:BIOS_eQTL_geneLevel
SYCE1L	16	77233294	77247112	3.75E-16	16:77049257:A_G;16:77137324:A_C;16:77146708:A_G;16:77157265:A_G;16:77168250:A_T;16:77180562:C_T;16:77211918:A_G;16:77237715:C_G	9.08E-77	Adipose_Subcutaneous:Adipose_Visceral_Omentum:Adrenal_Gland:Whole_Blood:Artery_Aorta:Artery_Coronary:Artery_Tibial:Brain_Anterior_cingulate_cortex_BA24:Brain_Caudate_basal_ganglia:Brain_Cerebellum:Brain_Cortex:Brain_Hippocampus:Brain_Hypothalamus:Brain_Nucleus_accumbens_basal_ganglia:Brain_Putamen_basal_ganglia:Breast_Mammary_Tissue:Colon_Sigmoid:Colon_Transverse:Esophagus_Gastroesophageal_Juncti…
MON1B	16	77224732	77236302	3.75E-16	16:77049257:A_G;16:77137324:A_C;16:77146708:A_G;16:77157265:A_G;16:77168250:A_T;16:77180562:C_T;16:77211918:A_G;16:77237715:C_G	3.09E-218	Whole_Blood:Artery_Tibial:Muscle_Skeletal:BIOS_eQTL_geneLevel
MNT	17	2287354	2304412	2.84E-09	17:2294048:A_C;17:2312842:A_G	1.81E-20	Adipose_Subcutaneous:Cells_EBV-transformed_lymphocytes:Lung:Skin_Sun_Exposed_Lower_leg:BIOS_eQTL_geneLevel
SGSM2	17	2240792	2284352	1.76E-09	17:2294048:A_C;17:2312842:A_G;17:2243628:C_T	0.000000056	Artery_Tibial:Esophagus_Mucosa:Skin_Sun_Exposed_Lower_leg:BIOS_eQTL_geneLevel
TSR1	17	2225797	2240801	1.76E-09	17:2294048:A_C;17:2312842:A_G;17:2243628:C_T	0.00000308	BIOS_eQTL_geneLevel
METTL16	17	2308856	2415185	1.18E-09	17:2243628:C_T;17:2312842:A_G;17:2400876:C_T	2.02E-26	BIOS_eQTL_geneLevel
PAFAH1B1	17	2496504	2588909	5.71E-09	17:2312842:A_G;17:2400876:C_T	0.0000337	BIOS_eQTL_geneLevel
SRR	17	2206677	2228554	1.76E-09	17:2243628:C_T;17:2312842:A_G	2.1E-10	BIOS_eQTL_geneLevel
PROCA1	17	27030215	27038872	1.76E-08	17:26933741:C_G	0.000000029	BIOS_eQTL_geneLevel
DHRS13	17	27224799	27230089	0.00000195	17:26933741:C_G	1.43E-14	BIOS_eQTL_geneLevel
ERAL1	17	27181956	27188085	0.00000195	17:26933741:C_G	0.000000969	BIOS_eQTL_geneLevel
FAM222B	17	27082996	27182250	0.00000195	17:26933741:C_G	0.0000399	BIOS_eQTL_geneLevel
TRAF4	17	27071002	27077974	0.00000195	17:26933741:C_G	0.00000179	Cells_Transformed_fibroblasts:BIOS_eQTL_geneLevel
HEXIM1	17	43224684	43229468	9.04E-13	17:43156135:A_T;17:43216281:C_T;17:43236109:C_T;17:43244700:A_C	5.17E-10	Artery_Tibial:Heart_Left_Ventricle:Nerve_Tibial:Cells_Transformed_fibroblasts
PLCD3	17	43186335	43210721	5.09E-13	17:43156135:A_T;17:43157709:A_G;17:43176632:A_C;17:43192821:A_G;17:43195981:C_T;17:43216281:C_T;17:43236109:C_T;17:43244700:A_C	2.01E-29	Adipose_Subcutaneous:Adipose_Visceral_Omentum:Lung:Muscle_Skeletal:BIOS_eQTL_geneLevel
HEXIM2	17	43238067	43247407	5.47E-13	17:43156135:A_T;17:43176632:A_C;17:43216281:C_T;17:43236109:C_T;17:43244700:A_C	3.01E-08	BIOS_eQTL_geneLevel
NMT1	17	43128978	43186384	5.09E-13	17:43156135:A_T;17:43157709:A_G;17:43176632:A_C;17:43192821:A_G;17:43195981:C_T;17:43216281:C_T;17:43236109:C_T;17:43244700:A_C	1.64E-32	Adipose_Subcutaneous:Adrenal_Gland:Artery_Aorta:Artery_Tibial:Breast_Mammary_Tissue:Esophagus_Gastroesophageal_Junction:Esophagus_Muscularis:Heart_Atrial_Appendage:Nerve_Tibial:Ovary:Pancreas:Prostate:Cells_Transformed_fibroblasts:Skin_Sun_Exposed_Lower_leg:Thyroid:BIOS_eQTL_geneLevel
ACBD4	17	43209967	43221548	5.47E-13	17:43156135:A_T;17:43195981:C_T;17:43216281:C_T;17:43244700:A_C	7.26E-14	Nerve_Tibial:Thyroid:BIOS_eQTL_geneLevel
DCAKD	17	43100708	43138473	5.09E-13	17:43156135:A_T;17:43157709:A_G;17:43176632:A_C;17:43192821:A_G;17:43195981:C_T;17:43216281:C_T;17:43236109:C_T;17:43244700:A_C	3.24E-239	Adipose_Subcutaneous:Whole_Blood:Artery_Aorta:Artery_Coronary:Artery_Tibial:Brain_Cerebellar_Hemisphere:Brain_Cerebellum:Breast_Mammary_Tissue:Colon_Sigmoid:Colon_Transverse:Esophagus_Gastroesophageal_Junction:Esophagus_Mucosa:Esophagus_Muscularis:Heart_Atrial_Appendage:Heart_Left_Ventricle:Lung:Muscle_Skeletal:Nerve_Tibial:Prostate:Skin_Not_Sun_Exposed_Suprapubic:Skin_Sun_Exposed_Lower_leg:Small…
FAM187A	17	42977135	42982758	1.2E-09	17:43157709:A_G	0.00000697	BIOS_eQTL_geneLevel
SPATA32	17	43331760	43339479	5.09E-13	17:43156135:A_T;17:43157709:A_G;17:43176632:A_C;17:43192821:A_G;17:43195981:C_T;17:43216281:C_T;17:43236109:C_T;17:43244700:A_C	1.99E-39	BIOS_eQTL_geneLevel
GFAP	17	42982376	42994305	1.2E-09	17:43157709:A_G	0.00000697	BIOS_eQTL_geneLevel
CCDC103	17	42976510	42982758	1.2E-09	17:43157709:A_G	0.00000697	BIOS_eQTL_geneLevel
HOXB2	17	46618256	46623441	1.23E-08	17:46035001:C_G;17:46563707:G_T;17:47012551:C_G	3.27167000000001e-310	Whole_Blood:Spleen:BIOS_eQTL_geneLevel
COPZ2	17	46103533	46115392	1.23E-08	17:46035001:C_G	4.28E-11	Artery_Tibial:Nerve_Tibial:Testis
PNPO	17	46018872	46025654	1.23E-08	17:46035001:C_G;17:46563707:G_T	0.0000102	BIOS_eQTL_geneLevel
UBE2Z	17	46985731	47006418	1.58E-10	17:46035001:C_G;17:47060322:A_C;17:47123423:C_T;17:47012551:C_G;17:47028472:A_G	3.46E-250	Cells_EBV-transformed_lymphocytes:Whole_Blood:Brain_Caudate_basal_ganglia:Brain_Cerebellum:Muscle_Skeletal:Nerve_Tibial:Skin_Not_Sun_Exposed_Suprapubic:Skin_Sun_Exposed_Lower_leg:BIOS_eQTL_geneLevel
NFE2L1	17	46125691	46138849	4.87E-09	17:46035001:C_G;17:47012551:C_G;17:47028472:A_G	5.44E-09	Esophagus_Mucosa:BIOS_eQTL_geneLevel
ATP5G1	17	46970127	46973233	1.58E-10	17:46035001:C_G;17:47060322:A_C;17:47123423:C_T;17:47012551:C_G;17:47028472:A_G	5.49E-52	Brain_Anterior_cingulate_cortex_BA24:Brain_Cerebellum:Brain_Cortex:Esophagus_Muscularis:Heart_Atrial_Appendage:Heart_Left_Ventricle:Muscle_Skeletal:Pituitary:Cells_Transformed_fibroblasts:Stomach:Thyroid:BIOS_eQTL_geneLevel
SNF8	17	47006678	47022479	1.58E-10	17:47012551:C_G;17:47028472:A_G;17:47060322:A_C;17:47123423:C_T	9.25E-13	Adrenal_Gland:Artery_Aorta:Brain_Cerebellum:Brain_Frontal_Cortex_BA9:Brain_Putamen_basal_ganglia:Colon_Transverse:Esophagus_Mucosa:Esophagus_Muscularis:Pituitary:Cells_Transformed_fibroblasts:Spleen:Testis:Thyroid:BIOS_eQTL_geneLevel
TTLL6	17	46839597	46894576	2.38E-09	17:46563707:G_T;17:47012551:C_G;17:47028472:A_G	4.23E-09	Brain_Cortex:Esophagus_Mucosa:Nerve_Tibial:Skin_Sun_Exposed_Lower_leg:Testis:Thyroid
SNX11	17	46180719	46200436	1.23E-08	17:46035001:C_G	2.2E-42	Whole_Blood:Lung:Nerve_Tibial:Cells_Transformed_fibroblasts:Skin_Not_Sun_Exposed_Suprapubic:Skin_Sun_Exposed_Lower_leg:BIOS_eQTL_geneLevel
SKAP1	17	46210802	46507637	2.09E-08	17:46035001:C_G;17:46563707:G_T	1.76E-20	BIOS_eQTL_geneLevel
HOXB3	17	46626232	46682274	3.48E-08	17:46563707:G_T;17:47012551:C_G	1.02E-273	Whole_Blood:BIOS_eQTL_geneLevel
HOXB4	17	46652875	46657473	3.48E-08	17:46563707:G_T;17:47012551:C_G	3.08E-127	Nerve_Tibial:BIOS_eQTL_geneLevel
HOXB6	17	46671639	46682354	3.51E-08	17:46563707:G_T	1.26E-12	BIOS_eQTL_geneLevel
HOXB7	17	46684594	46710934	0.000000231	17:46563707:G_T	0.0000342	BIOS_eQTL_geneLevel
PRR15L	17	46029333	46035244	1.23E-08	17:46035001:C_G	1.28E-23	Lung:Nerve_Tibial:Thyroid:BIOS_eQTL_geneLevel
CDK5RAP3	17	46045176	46059140	0.000000505	17:46035001:C_G	0.0000187	Nerve_Tibial
SP6	17	45922279	45933240	3.51E-08	17:46563707:G_T	0.0000301	Cells_Transformed_fibroblasts
LRRC46	17	45908993	45915079	1.23E-08	17:46035001:C_G	2.41E-11	BIOS_eQTL_geneLevel
SCRN2	17	45915058	45918699	1.23E-08	17:46035001:C_G	2.09E-12	BIOS_eQTL_geneLevel
TBKBP1	17	45771447	45789416	1.88E-08	17:46035001:C_G	7.72E-10	BIOS_eQTL_geneLevel
CYB561	17	61509665	61523739	2.75E-10	17:61024696:C_T;17:61201358:A_G	1.1E-30	Artery_Aorta:Brain_Anterior_cingulate_cortex_BA24:Brain_Caudate_basal_ganglia:Brain_Cortex:Brain_Frontal_Cortex_BA9:Brain_Hippocampus:Brain_Hypothalamus:Brain_Nucleus_accumbens_basal_ganglia:Brain_Putamen_basal_ganglia:Muscle_Skeletal:Pancreas:Cells_Transformed_fibroblasts:BIOS_eQTL_geneLevel
TANC2	17	61086917	61505060	4.36E-10	17:61024696:C_T;17:61201358:A_G	1.32E-110	BIOS_eQTL_geneLevel
FTSJ3	17	61896793	61907372	2.67E-08	17:61024696:C_T;17:61201358:A_G	0.00000291	Cells_Transformed_fibroblasts
CSH2	17	61949372	61951126	2.67E-08	17:61201358:A_G	0.0000229	Brain_Cerebellum
ASXL3	18	31158579	31331156	2.13E-09	18:31313965:G_T;18:31285269:A_C	0.00000889	Pituitary
SEC11C	18	56806709	56826068	4.54E-08	18:56824041:A_C	3.46E-15	Adipose_Subcutaneous:Adipose_Visceral_Omentum:Artery_Aorta:Artery_Tibial:Esophagus_Gastroesophageal_Junction:Esophagus_Mucosa:Esophagus_Muscularis:Heart_Atrial_Appendage:Nerve_Tibial:Cells_Transformed_fibroblasts:Skin_Not_Sun_Exposed_Suprapubic:Skin_Sun_Exposed_Lower_leg:Testis:BIOS_eQTL_geneLevel
KDM4B	19	4969125	5153606	1.07E-11	19:4991417:G_T;19:5036564:A_G;19:5073447:A_G;19:5088927:A_G;19:5132708:C_T	6.4E-34	BIOS_eQTL_geneLevel
PTPRS	19	5158506	5340814	2.81E-08	19:5132708:C_T	0.00000822	BIOS_eQTL_geneLevel
ARRDC5	19	4890449	4902879	3.01E-11	19:4991417:G_T;19:5036564:A_G;19:5073447:A_G;19:5088927:A_G;19:5132708:C_T	1.57E-15	BIOS_eQTL_geneLevel
ZNF536	19	30719197	31204445	4.66E-08	19:30710785:A_G	0.00000412	Cells_Transformed_fibroblasts
ZNF865	19	56116771	56128635	0.000000962	19:56134038:C_T	2.28E-08	BIOS_eQTL_geneLevel
ZNF784	19	56132108	56135967	1.41E-11	19:56170415:C_T;19:56215184:A_G;19:56134038:C_T	0.00000493	BIOS_eQTL_geneLevel
CCDC106	19	56152428	56164527	5.23E-09	19:56170415:C_T;19:56215184:A_G	0.0000462	BIOS_eQTL_geneLevel
NLRP9	19	56219798	56249768	1.42E-11	19:56170415:C_T;19:56215184:A_G;19:56217261:G_T	7.04E-14	BIOS_eQTL_geneLevel
ZNF580	19	56146382	56154835	1.41E-11	19:56134038:C_T;19:56170415:C_T;19:56215184:A_G;19:56217261:G_T	5.16E-21	Adipose_Subcutaneous:Adipose_Visceral_Omentum:Adrenal_Gland:Artery_Aorta:Artery_Tibial:Brain_Caudate_basal_ganglia:Brain_Cerebellar_Hemisphere:Brain_Cerebellum:Brain_Cortex:Brain_Frontal_Cortex_BA9:Brain_Hippocampus:Brain_Nucleus_accumbens_basal_ganglia:Brain_Putamen_basal_ganglia:Breast_Mammary_Tissue:Colon_Sigmoid:Colon_Transverse:Esophagus_Gastroesophageal_Junction:Esophagus_Mucosa:Esophagus_M…
ZNF581	19	56146825	56156988	1.41E-11	19:56134038:C_T;19:56170415:C_T;19:56215184:A_G;19:56217261:G_T	5.2E-18	BIOS_eQTL_geneLevel
ZNF524	19	56111388	56114504	0.000000962	19:56134038:C_T	0.0000191	BIOS_eQTL_geneLevel
ZNF579	19	56088899	56092211	1.41E-11	19:56134038:C_T;19:56170415:C_T;19:56215184:A_G	0.00000216	BIOS_eQTL_geneLevel
RFPL4A	19	56270380	56274541	8.42E-10	19:56134038:C_T;19:56217261:G_T	1.63E-11	BIOS_eQTL_geneLevel
RFPL4AL1	19	56280507	56284545	1.42E-11	19:56134038:C_T;19:56170415:C_T;19:56217261:G_T	3.56E-10	BIOS_eQTL_geneLevel
FIZ1	19	56102746	56113336	0.000000962	19:56134038:C_T	0.0000191	BIOS_eQTL_geneLevel
ASXL1	20	30946155	31027122	2.32E-20	20:30695145:G_T;20:30725648:A_G;20:31046567:A_C;20:31099311:C_T;20:31102309:A_G;20:31163914:C_G;20:31187504:C_G	2.24E-13	BIOS_eQTL_geneLevel
POFUT1	20	30795683	30826470	2.95E-15	20:30695145:G_T;20:30725648:A_G;20:31046567:A_C;20:31099311:C_T	0.00000927	Artery_Aorta
PLAGL2	20	30780306	30795594	9.28E-16	20:30695145:G_T;20:30725648:A_G;20:31046567:A_C;20:31099311:C_T;20:30675676:A_G	2.87E-10	BIOS_eQTL_geneLevel
NOL4L	20	31030862	31172876	2.32E-20	20:30695145:G_T;20:30725648:A_G;20:31046567:A_C;20:31099311:C_T;20:31102309:A_G;20:31163914:C_G;20:31187504:C_G	1.39E-55	Whole_Blood:Pancreas:BIOS_eQTL_geneLevel
RP11-410N8.4	20	31175281	31196695	2.32E-20	20:31102309:A_G;20:31163914:C_G;20:31187504:C_G	1.16E-08	Testis
TM9SF4	20	30697309	30755061	9.28E-16	20:30695145:G_T;20:30725648:A_G;20:31046567:A_C;20:31099311:C_T	0.000000563	Cells_Transformed_fibroblasts
DNMT3B	20	31350191	31397162	2.32E-20	20:31163914:C_G	0.0000818	BIOS_eQTL_geneLevel
CSE1L	20	47662849	47713489	6.47E-10	20:47774512:C_T	1.65E-14	Adipose_Subcutaneous:Muscle_Skeletal:Thyroid:BIOS_eQTL_geneLevel
STAU1	20	47729878	47804904	6.47E-10	20:47774512:C_T	0.000000471	Muscle_Skeletal:BIOS_eQTL_geneLevel
ARFGEF2	20	47538427	47653230	6.47E-10	20:47774512:C_T	8.49E-11	BIOS_eQTL_geneLevel
ZNFX1	20	47854483	47894963	6.47E-10	20:47774512:C_T	5.48E-83	BIOS_eQTL_geneLevel
KCNB1	20	47980414	48099184	9.54E-10	20:47774512:C_T	2.36E-11	BIOS_eQTL_geneLevel
ZFP64	20	50668202	50820847	2.48E-08	20:50985290:A_T	2.97E-15	Artery_Tibial:Cells_Transformed_fibroblasts:BIOS_eQTL_geneLevel
ZNF512B	20	62588055	62680113	2.73E-08	20:62670427:G_T	1.28E-09	BIOS_eQTL_geneLevel
SAMD10	20	62605466	62611361	2.73E-08	20:62670427:G_T	2.9E-13	Nerve_Tibial:BIOS_eQTL_geneLevel
ABHD16B	20	62492566	62494341	2.73E-08	20:62670427:G_T	6.71E-08	BIOS_eQTL_geneLevel
PRPF6	20	62612488	62664453	2.73E-08	20:62670427:G_T	1.59E-35	Whole_Blood:Esophagus_Mucosa:Skin_Not_Sun_Exposed_Suprapubic:Skin_Sun_Exposed_Lower_leg:Stomach:BIOS_eQTL_geneLevel
UCKL1	20	62571186	62587769	2.73E-08	20:62670427:G_T	1E-33	BIOS_eQTL_geneLevel
PCMTD2	20	62887094	62926855	2.73E-08	20:62670427:G_T	0.0000392	BIOS_eQTL_geneLevel
TPD52L2	20	62496596	62522898	0.00000891	20:62670427:G_T	0.0000198	BIOS_eQTL_geneLevel
DNAJC5	20	62526518	62567384	0.00000891	20:62670427:G_T	0.0000847	BIOS_eQTL_geneLevel
EP300	22	41487790	41576081	1.82E-09	22:41432389:C_G;22:41496800:A_G;22:41753603:A_G	9.64E-12	Esophagus_Mucosa:BIOS_eQTL_geneLevel
RANGAP1	22	41641615	41682255	3.81E-09	22:41432389:C_G;22:41496800:A_G;22:41753603:A_G	2.12E-08	Esophagus_Mucosa:Nerve_Tibial
TEF	22	41763337	41795330	1.82E-09	22:41432389:C_G;22:41496800:A_G;22:41753603:A_G	5.9E-249	Cells_EBV-transformed_lymphocytes:Whole_Blood:Testis:BIOS_eQTL_geneLevel
L3MBTL2	22	41601209	41627275	1.82E-09	22:41432389:C_G;22:41496800:A_G;22:41753603:A_G	6.88E-08	Esophagus_Mucosa:Pituitary:BIOS_eQTL_geneLevel
SLC25A17	22	41165634	41215403	1.82E-09	22:41432389:C_G;22:41496800:A_G;22:41753603:A_G	0.000000141	Cells_Transformed_fibroblasts:BIOS_eQTL_geneLevel
TOB2	22	41829496	41843027	3.81E-09	22:41496800:A_G;22:41753603:A_G	1.62E-09	BIOS_eQTL_geneLevel
DNAJB7	22	41255553	41258130	1.82E-09	22:41432389:C_G;22:41496800:A_G	4.26E-64	BIOS_eQTL_geneLevel
MEI1	22	42095503	42195460	1.82E-09	22:41432389:C_G;22:41496800:A_G;22:41753603:A_G	1.22E-18	Adipose_Subcutaneous:Adipose_Visceral_Omentum:Adrenal_Gland:Cells_EBV-transformed_lymphocytes:Whole_Blood:Artery_Aorta:Artery_Tibial:Colon_Transverse:Esophagus_Gastroesophageal_Junction:Esophagus_Mucosa:Esophagus_Muscularis:Heart_Left_Ventricle:Lung:Cells_Transformed_fibroblasts
WBP2NL	22	42394729	42454460	1.82E-09	22:41496800:A_G	0.000000251	Brain_Frontal_Cortex_BA9
POLR3H	22	41921808	41940610	1.82E-09	22:41432389:C_G;22:41496800:A_G;22:41753603:A_G	3.39E-20	Brain_Cortex:Brain_Frontal_Cortex_BA9:Testis:BIOS_eQTL_geneLevel
CSDC2	22	41956767	41973745	0.000000012	22:41753603:A_G	5.01E-21	Brain_Cortex:Brain_Frontal_Cortex_BA9:Cells_Transformed_fibroblasts:BIOS_eQTL_geneLevel
DESI1	22	41994032	42017100	2.47E-08	22:41753603:A_G	2.05E-42	Stomach:BIOS_eQTL_geneLevel
NHP2L1	22	42069934	42086508	0.00000506	22:41753603:A_G	0.0000163	Artery_Aorta:Esophagus_Mucosa
ACO2	22	41865129	41924993	1.82E-09	22:41496800:A_G;22:41753603:A_G	4.14E-11	Artery_Aorta:Artery_Tibial:Lung:Nerve_Tibial:Ovary:Thyroid:BIOS_eQTL_geneLevel
PMM1	22	41972898	41985894	0.000000012	22:41753603:A_G	1.23E-27	Cells_EBV-transformed_lymphocytes:Esophagus_Mucosa:Esophagus_Muscularis:Cells_Transformed_fibroblasts:Skin_Sun_Exposed_Lower_leg:Thyroid:BIOS_eQTL_geneLevel
XPNPEP3	22	41253081	41363838	1.82E-09	22:41432389:C_G;22:41496800:A_G	4.26E-64	BIOS_eQTL_geneLevel
CCDC134	22	42196683	42222303	2.86E-09	22:41496800:A_G;22:41753603:A_G	3.32E-13	Testis
LRGUK	7	133812052	133949343	1.8E-10	7:132556835:C_G;7:132658084:A_C;7:132672192:G_T;7:133989882:C_T;7:133894515:C_G	1.29E-106	Adipose_Subcutaneous:Adipose_Visceral_Omentum:Adrenal_Gland:Whole_Blood:Artery_Aorta:Colon_Sigmoid:Colon_Transverse:Esophagus_Mucosa:Heart_Left_Ventricle:Liver:Lung:Muscle_Skeletal:Nerve_Tibial:Pancreas:Prostate:Cells_Transformed_fibroblasts:Skin_Not_Sun_Exposed_Suprapubic:Skin_Sun_Exposed_Lower_leg:Stomach:Thyroid:BIOS_eQTL_geneLevel
ZFP57	6	29640169	29648887	8.91E-10	6:29274356:A_T;6:29355113:C_T;6:30576781:C_G	2.81E-11	Adipose_Subcutaneous:Adipose_Visceral_Omentum:Adrenal_Gland:Whole_Blood:Artery_Aorta:Artery_Tibial:Colon_Transverse:Esophagus_Mucosa:Esophagus_Muscularis:Heart_Atrial_Appendage:Lung:Muscle_Skeletal:Nerve_Tibial:Cells_Transformed_fibroblasts:Skin_Not_Sun_Exposed_Suprapubic:Skin_Sun_Exposed_Lower_leg:Thyroid
