# Supplementary material for: Effects of Insomnia on Peptic Ulcer Disease Using Mendelian Randomization
Source: Oxid Med Cell Longev. 2021 Sep 25;2021:2216314. doi: 10.1155/2021/2216314 (PMC8487841; doi:10.1155/2021/2216314)
Supplement: Supplementary Materials — Supplementary Table 1: insomnia-associated SNPs. Supplementary Table 2: position mapping genes. Supplementary Table 3: eQTL mapping genes. Supplementary Table 4: chromatin interaction mapping genes. [file 2216314.f1.zip › 2216314.f4.txt]

Gene	Chr	Start Bp	End Bp	GWAS P	SNPs	Chromatin interaction mapping tissue
NEGR1	1	71861623	72748417	2.27E-14	1:72619961:A_C;1:72729142:A_G;1:72764289:C_T;1:72939855:A_C;1:73735403:C_G;1:72635996:A_C;1:72825144:A_T;1:72904288:A_G;1:72747844:C_T	Aorta:Left_Ventricle:Liver:Right_Ventricle
IPO9	1	201798269	201853422	0.000000091	1:201765094:C_T	Aorta:Dorsolateral_Prefrontal_Cortex:Hippocampus:Left_Ventricle:Liver:Right_Ventricle:Spleen
MTA3	2	42721709	42984087	1.82E-09	2:42813247:G_T;2:43110476:C_G	Bladder:Left_Ventricle:Liver:Spleen
OXER1	2	42989642	42991401	1.82E-09	2:42813247:G_T;2:43110476:C_G	Liver
KCNG3	2	42669157	42721237	2.26E-08	2:42813247:G_T	Bladder:Left_Ventricle:Liver:Spleen
Mar-07	2	160569000	160627538	4.95E-09	2:160415477:C_T;2:160570033:C_T	Aorta:Left_Ventricle:Liver
PLCL1	2	198669426	199437305	6.41E-10	2:198438425:C_T;2:198950240:A_G;2:198735712:A_G	Aorta:Hippocampus:Left_Ventricle:Right_Ventricle
HSPE1	2	198364718	198368181	3.74E-08	2:198438425:C_T;2:198950240:A_G	Liver
HSPE1-MOB4	2	198365137	198415450	8.63E-08	2:198438425:C_T;2:198735712:A_G	Liver
MOB4	2	198380295	198418423	8.63E-08	2:198438425:C_T;2:198735712:A_G	Liver
HSPD1	2	198351305	198381461	8.63E-08	2:198438425:C_T	Liver
BOLL	2	198591603	198651486	2.05E-08	2:198438425:C_T;2:198950240:A_G;2:198735712:A_G	Aorta:Hippocampus:Left_Ventricle:Right_Ventricle
KLF7	2	207938861	208031991	4.82E-11	2:208042581:A_C	Left_Ventricle
FAM198A	3	43020759	43101703	8.82E-11	3:43066558:A_G	Spleen
RBM5	3	50126341	50156454	7.32E-12	3:49899795:A_G;3:50209053:G_T;3:50218879:C_T;3:49860854:C_T;3:49890613:C_T	Liver:Spleen
APEH	3	49711435	49721396	4.04E-11	3:49621994:C_T;3:49863483:C_T;3:49890613:C_T;3:49899795:A_G;3:50070843:A_T;3:50209053:G_T	Left_Ventricle:Liver:Spleen
FAM212A	3	49840687	49842463	7.32E-12	3:49863483:C_T;3:49890613:C_T;3:49899795:A_G;3:50209053:G_T;3:49621994:C_T;3:49860854:C_T;3:50218879:C_T	Spleen
QRICH1	3	49067140	49131796	1.92E-11	3:49863483:C_T;3:49211989:C_T;3:49621994:C_T;3:48941551:C_T	Left_Ventricle
UBA7	3	49842640	49851379	7.32E-12	3:49863483:C_T;3:49890613:C_T;3:49899795:A_G;3:50209053:G_T;3:49621994:C_T;3:49860854:C_T;3:50218879:C_T	Spleen
CAMKV	3	49895421	49907655	1.05E-10	3:49621994:C_T;3:49863483:C_T;3:49890613:C_T;3:49899795:A_G;3:50209053:G_T	Spleen
TRAIP	3	49866034	49894007	4.04E-11	3:49621994:C_T;3:49863483:C_T;3:49890613:C_T	Spleen
GNAT1	3	50229045	50233949	3.58E-11	3:49899795:A_G;3:50209053:G_T;3:50297330:A_G;3:50218879:C_T	Left_Ventricle:Liver:Pancreas:Spleen
USP19	3	49145479	49158371	0.00000216	3:49863483:C_T	Left_Ventricle
QARS	3	49133365	49142553	0.00000216	3:49863483:C_T	Left_Ventricle
HHLA2	3	108015376	108097132	2.28E-08	3:107946831:C_G;3:107955515:A_G	Left_Ventricle:Liver
CD47	3	107762145	107809872	2.28E-08	3:107946831:C_G;3:107955515:A_G	Left_Ventricle
LSAMP	3	115521235	117716095	2.66E-12	3:117642005:A_C;3:117535656:C_T;3:117602144:C_T;3:117332915:A_G	Left_Ventricle
NLGN1	3	173114074	174004434	3.17E-13	3:173114513:C_G;3:173112907:C_T	Left_Ventricle
PRKG2	4	82009837	82136218	6.13E-10	4:82288564:A_G;4:82309913:C_T	Left_Ventricle
PPA2	4	106290234	106395238	4.53E-13	4:106055212:C_T;4:106094427:A_G;4:106112676:G_T;4:106127121:C_T;4:106256521:A_C;4:106309224:A_G	Aorta:Left_Ventricle:Liver:Right_Ventricle:Spleen
TET2	4	106067032	106200973	5.73E-13	4:106112676:G_T;4:106309224:A_G;4:106094427:A_G;4:106127121:C_T;4:106256521:A_C	Left_Ventricle
TMEM161B	5	87485450	87565293	9.04E-16	5:87693561:C_T;5:87485064:A_G	Left_Ventricle:Liver
PAM	5	102089685	102366809	1.64E-10	5:102118385:C_T;5:102660400:C_T	Aorta:Hippocampus:Left_Ventricle:Liver:Right_Ventricle
TGFBI	5	135364584	135399507	0.000000314	5:135414893:C_T;5:135605017:A_C	Left_Ventricle:Liver:Spleen
RNF130	5	179338651	179499118	2.21E-08	5:179511043:A_G	Hippocampus:Left_Ventricle:Liver:Spleen
MDC1	6	30667584	30685666	8.91E-10	6:30576781:C_G	Right_Ventricle
TUBB	6	30687978	30693203	8.91E-10	6:30576781:C_G;6:30693900:C_T	Right_Ventricle
PPP1R10	6	30568177	30586389	8.91E-10	6:30693900:C_T;6:30576781:C_G	Right_Ventricle
ATAT1	6	30594619	30614600	1.32E-09	6:30693900:C_T;6:30576781:C_G	Right_Ventricle
FLOT1	6	30695486	30710510	8.91E-10	6:30576781:C_G	Right_Ventricle
C6orf136	6	30614816	30620987	8.91E-10	6:30576781:C_G;6:30693900:C_T	Liver:Lung:Right_Ventricle:Spleen
MRPS18B	6	30585486	30594172	3.19E-08	6:30693900:C_T	Right_Ventricle
IER3	6	30710976	30712331	8.91E-10	6:30576781:C_G	Right_Ventricle
MSH5-SAPCD1	6	31707797	31732628	0.000000372	6:31563228:A_C;6:31475127:A_G	Right_Ventricle
ATP6V1G2-DDX39B	6	31497996	31514385	7.88E-10	6:31475127:A_G;6:31563228:A_C	Right_Ventricle
CSNK2B	6	31633013	31638120	1.23E-08	6:31475127:A_G;6:31563228:A_C	Right_Ventricle
DDAH2	6	31694815	31698394	7.88E-10	6:31563228:A_C;6:31475127:A_G	Right_Ventricle
NCR3	6	31556672	31560762	7.88E-10	6:31563228:A_C;6:31475127:A_G	Right_Ventricle
MICB	6	31462658	31478901	7.88E-10	6:31475127:A_G;6:31563228:A_C	Right_Ventricle
MSH5	6	31707725	31732622	0.000000372	6:31563228:A_C;6:31475127:A_G	Right_Ventricle
ATP6V1G2	6	31512239	31516204	7.88E-10	6:31475127:A_G;6:31563228:A_C	Right_Ventricle
PRRC2A	6	31588497	31605548	0.000000372	6:31563228:A_C	Right_Ventricle
BAG6	6	31606805	31620482	7.88E-10	6:31475127:A_G;6:31563228:A_C	Right_Ventricle
DDX39B	6	31497996	31510225	7.88E-10	6:31475127:A_G;6:31563228:A_C	Right_Ventricle
C6orf48	6	31802385	31807541	1.23E-08	6:31563228:A_C	Right_Ventricle:Spleen
MCCD1	6	31496494	31498009	1.16E-09	6:31475127:A_G;6:31563228:A_C	Right_Ventricle
NFKBIL1	6	31514647	31526606	1.16E-09	6:31475127:A_G;6:31563228:A_C	Right_Ventricle
CLIC1	6	31698358	31707540	0.000000397	6:31563228:A_C	Right_Ventricle
NEU1	6	31825436	31830683	0.000000397	6:31563228:A_C	Right_Ventricle:Spleen
APOM	6	31620193	31625987	1.23E-08	6:31475127:A_G;6:31563228:A_C	Right_Ventricle
C6orf47	6	31626075	31628549	1.23E-08	6:31475127:A_G;6:31563228:A_C	Right_Ventricle
GPANK1	6	31629006	31634060	1.23E-08	6:31475127:A_G;6:31563228:A_C	Right_Ventricle
LEMD2	6	33738979	33756913	9.06E-21	6:33647058:C_T;6:33648997:A_G;6:33659536:A_G;6:33689534:A_G;6:33698461:C_T;6:33702079:C_T;6:33702869:C_T;6:33707599:C_T;6:33718418:C_T;6:33777432:C_T;6:33644033:C_T;6:33738314:C_T	Spleen
UQCC2	6	33662070	33679504	4.68E-20	6:33647058:C_T;6:33702079:C_T;6:33707599:C_T;6:33718418:C_T;6:33738314:C_T;6:33777432:C_T;6:33540209:A_G;6:33648997:A_G;6:33659536:A_G;6:33689534:A_G;6:33702869:C_T	Spleen
FRS3	6	41737914	41754280	4.08E-08	6:41754370:C_T	Left_Ventricle:Liver:Spleen
PRICKLE4	6	41748087	41757879	4.08E-08	6:41754370:C_T	Left_Ventricle:Liver:Spleen
BYSL	6	41888926	41900784	4.08E-08	6:41754370:C_T	Left_Ventricle:Liver:Spleen
MED20	6	41873092	41888877	4.08E-08	6:41754370:C_T	Left_Ventricle:Liver:Spleen
TOMM6	6	41755400	41757636	4.08E-08	6:41754370:C_T	Left_Ventricle:Liver:Spleen
ASCC3	6	100956070	101329248	2.18E-11	6:101212001:A_T;6:100925828:C_T;6:100982169:C_T	Left_Ventricle:Liver
SIM1	6	100832891	100912805	4.11E-10	6:100925828:C_T;6:101212001:A_T	Left_Ventricle:Liver:Spleen
PACRG	6	163148164	163736524	3.09E-09	6:163214327:A_G;6:163280204:C_T	Left_Ventricle:Liver
PRKN	6	161768452	163148803	6.83E-09	6:163214327:A_G	Left_Ventricle:Liver
SDK1	7	3341080	4308632	5.49E-10	7:3307861:C_T;7:3323848:C_T;7:3520024:A_G;7:3709491:G_T;7:3319635:A_G;7:3769198:A_G;7:3824141:A_T	Aorta:Left_Ventricle:Liver:Spleen
COG5	7	106842000	107204959	4.15E-08	7:106844694:C_T	Aorta:Left_Ventricle:Liver:Right_Ventricle
HBP1	7	106809406	106842974	4.15E-08	7:106844694:C_T	Aorta:Left_Ventricle:Liver:Right_Ventricle
BCAP29	7	107220422	107269615	0.000000064	7:106844694:C_T	Aorta:Left_Ventricle:Liver:Right_Ventricle
DUS4L	7	107203929	107218906	0.000000064	7:106844694:C_T	Aorta:Left_Ventricle:Liver:Right_Ventricle
GPR22	7	107110463	107116098	0.000000064	7:106844694:C_T	Aorta:Dorsolateral_Prefrontal_Cortex:Left_Ventricle:Liver:Right_Ventricle
RORB	9	77112281	77308093	8.46E-09	9:77118987:C_T	Aorta:Left_Ventricle:Liver
FAM120AOS	9	96208776	96215874	2.12E-12	9:96218194:C_T;9:96361922:A_G;9:96392019:A_G;9:96392815:C_T	Left_Ventricle:Liver:Right_Ventricle
PHF2	9	96338689	96441869	2.12E-12	9:96218194:C_T;9:96361922:A_G;9:96392815:C_T;9:96392019:A_G	Left_Ventricle:Liver
FAM120A	9	96214004	96328397	5.44E-12	9:96218194:C_T;9:96361922:A_G	Left_Ventricle:Liver:Right_Ventricle
ZBTB6	9	125670335	125675609	1.15E-10	9:125621610:C_G;9:125867350:C_T	Aorta:Left_Ventricle:Liver
RABGAP1	9	125703112	125867145	1.15E-10	9:125621610:C_G;9:125867350:C_T	Aorta:Left_Ventricle:Liver
RC3H2	9	125606835	125667620	1.15E-10	9:125621610:C_G;9:125867350:C_T	Aorta:Left_Ventricle:Liver
STRBP	9	125871779	126030855	1.48E-10	9:125621610:C_G;9:125867350:C_T	Left_Ventricle:Liver
ZBTB26	9	125677845	125693779	1.48E-10	9:125621610:C_G;9:125867350:C_T	Aorta:Left_Ventricle:Liver
MED27	9	134735494	134955295	4.24E-09	9:134886837:A_G	Aorta:Hippocampus:Left_Ventricle:Liver
MLLT10	10	21823094	22032559	3.89E-10	10:21821918:A_T	Liver
SKIDA1	10	21802407	21814611	2.01E-09	10:21821918:A_T	Liver
CASC10	10	21781587	21786191	0.00000006	10:21821918:A_T	Aorta:Left_Ventricle:Liver:Right_Ventricle:Spleen
NCR3LG1	11	17373273	17398888	3.16E-09	11:17193475:A_T;11:17004090:C_G;11:17115018:A_G	Left_Ventricle
CELF1	11	47487496	47587121	2.19E-11	11:47406592:C_T;11:47606483:A_G	Liver
PTPMT1	11	47586982	47595013	7.01E-13	11:47406592:C_T;11:47606483:A_G	Liver
NDUFS3	11	47586888	47606114	7.01E-13	11:47406592:C_T;11:47606483:A_G	Liver
AGBL2	11	47681143	47736941	2.19E-11	11:47406592:C_T;11:47606483:A_G	Left_Ventricle:Liver
KBTBD4	11	47593749	47600567	2.19E-11	11:47406592:C_T;11:47606483:A_G	Liver
CLP1	11	57416465	57429340	4.49E-10	11:57404779:A_G;11:57667222:C_T	Aorta:Left_Ventricle:Liver:Lung:Pancreas:Spleen
MED19	11	57471186	57479693	4.49E-10	11:57404779:A_G;11:57667222:C_T	Aorta:Left_Ventricle:Liver:Right_Ventricle:Spleen
ZDHHC5	11	57435219	57468659	4.49E-10	11:57404779:A_G;11:57667222:C_T	Aorta:Left_Ventricle:Liver:Lung:Pancreas:Spleen
TMX2	11	57480072	57508445	4.49E-10	11:57404779:A_G;11:57667222:C_T	Aorta:Left_Ventricle:Liver:Right_Ventricle:Spleen
SERPING1	11	57364860	57382326	2.63E-09	11:57404779:A_G;11:57667222:C_T	Liver
YPEL4	11	57412560	57417417	1.48E-09	11:57404779:A_G;11:57667222:C_T	Aorta:Left_Ventricle:Liver:Lung:Pancreas:Spleen
TMX2-CTNND1	11	57480077	57559058	1.13E-08	11:57404779:A_G;11:57667222:C_T	Aorta:Left_Ventricle:Liver:Right_Ventricle:Spleen
CCDC87	11	66357640	66360554	1.18E-10	11:66328095:C_T;11:66328741:A_C;11:66401373:G_T;11:66274958:A_C	Aorta:Hippocampus:Left_Ventricle:Liver:Spleen
CTSF	11	66330934	66336312	1.18E-10	11:66328741:A_C;11:66274958:A_C;11:66328095:C_T;11:66401373:G_T	Spleen
CCS	11	66360292	66373490	1.18E-10	11:66328095:C_T;11:66328741:A_C;11:66401373:G_T;11:66274958:A_C	Aorta:Hippocampus:Left_Ventricle:Liver:Spleen
RBM14-RBM4	11	66384097	66413940	1.18E-10	11:66328095:C_T;11:66328741:A_C;11:66401373:G_T;11:66274958:A_C	Aorta:Hippocampus:Left_Ventricle:Liver:Spleen
RBM14	11	66384053	66394818	5.5E-09	11:66328095:C_T;11:66328741:A_C;11:66401373:G_T	Aorta:Hippocampus:Left_Ventricle:Liver:Spleen
NPAS4	11	66188475	66194178	3.05E-09	11:66328741:A_C;11:66650501:A_G;11:66274958:A_C	Aorta:Dorsolateral_Prefrontal_Cortex:Liver:Spleen
RBM4	11	66384097	66434153	1.18E-10	11:66328095:C_T;11:66328741:A_C;11:66401373:G_T;11:66274958:A_C	Aorta:Hippocampus:Left_Ventricle:Liver:Spleen
RBM4B	11	66432469	66445392	9.2E-10	11:65969091:C_T;11:66058082:G_T;11:66274958:A_C;11:66328095:C_T;11:66328741:A_C;11:66401373:G_T;11:66650501:A_G	Aorta:Dorsolateral_Prefrontal_Cortex:Hippocampus:Left_Ventricle:Liver:Spleen
TYR	11	88910620	89028927	0.0000002	11:89029931:C_T	Left_Ventricle:Liver
KCTD10	12	109886461	109915349	1.51E-08	12:109982578:A_T	Left_Ventricle:Liver
UBE3B	12	109915207	109974507	1.51E-08	12:109982578:A_T	Left_Ventricle:Liver
ABCB9	12	123405498	123466196	1.74E-13	12:123600086:C_G;12:123856998:A_G;12:123404966:A_C;12:123558705:C_T	Spleen
PITPNM2	12	123468027	123634562	1.74E-13	12:123558705:C_T;12:123600086:C_G;12:123856998:A_G;12:123404966:A_C	Adrenal:Aorta:Bladder:Dorsolateral_Prefrontal_Cortex:Left_Ventricle:Liver:Lung:Pancreas:Right_Ventricle:Spleen
OGFOD2	12	123459127	123464590	1.74E-13	12:123600086:C_G;12:123856998:A_G;12:123404966:A_C;12:123558705:C_T	Spleen
CDK2AP1	12	123745528	123756881	1.74E-13	12:123558705:C_T;12:123600086:C_G;12:123856998:A_G;12:123404966:A_C	Aorta:Left_Ventricle:Liver:Spleen
C12orf65	12	123717463	123742506	1.74E-13	12:123558705:C_T;12:123600086:C_G;12:123856998:A_G	Aorta:Left_Ventricle:Liver:Lung:Pancreas:Spleen
ARL6IP4	12	123464607	123467456	1.74E-13	12:123600086:C_G;12:123856998:A_G;12:123404966:A_C;12:123558705:C_T	Spleen
DIAPH3	13	60239717	60738121	1.38E-10	13:60362013:A_G;13:60532796:C_T;13:60670489:A_G	Left_Ventricle
NPAS3	14	33404139	34273382	7.33E-13	14:33381862:A_G;14:33420086:A_C;14:33412996:A_G;14:33420212:A_G	Liver
RASGRP1	15	38780304	38857776	4.42E-13	15:38897857:C_T;15:38899190:C_T;15:38846678:C_T;15:38867914:C_T	Aorta:Left_Ventricle:Liver
TCF12	15	57210821	57591479	7.85E-12	15:57215867:A_G	Aorta:Bladder:Dorsolateral_Prefrontal_Cortex:Hippocampus:Left_Ventricle:Liver:Right_Ventricle
ZNF280D	15	56922379	57210769	6.69E-11	15:57215867:A_G	Aorta:Bladder:Dorsolateral_Prefrontal_Cortex:Hippocampus:Left_Ventricle:Liver:Right_Ventricle
DIS3L	15	66585555	66626236	0.000000018	15:66709386:C_G	Left_Ventricle:Liver:Spleen
TIPIN	15	66628544	66679084	0.000000018	15:66709386:C_G	Aorta:Left_Ventricle:Liver:Right_Ventricle:Spleen
ZWILCH	15	66797297	66842115	0.000000022	15:66709386:C_G	Aorta:Left_Ventricle:Liver:Right_Ventricle:Spleen
MAP2K1	15	66679155	66784650	0.000000018	15:66709386:C_G	Aorta:Left_Ventricle:Liver:Right_Ventricle:Spleen
SNAPC5	15	66782473	66790151	0.000000022	15:66709386:C_G	Aorta:Left_Ventricle:Liver:Right_Ventricle:Spleen
IQCK	16	19727778	19868907	2.18E-12	16:19876092:C_T;16:19904344:A_T	Left_Ventricle
GPRC5B	16	19868616	19897489	3.1E-12	16:19904344:A_T;16:19876092:C_T	Hippocampus
KNOP1	16	19714902	19729557	2.18E-12	16:19876092:C_T;16:19904344:A_T;16:20006745:C_G;16:20059843:A_T	Left_Ventricle
GNAO1	16	56225302	56391356	1.11E-12	16:56090503:C_T;16:56128782:C_T;16:56146367:A_G;16:56347472:G_T;16:56352854:A_C;16:56357745:G_T;16:56361557:C_T	Aorta:Dorsolateral_Prefrontal_Cortex:Hippocampus:Left_Ventricle:Liver:Pancreas:Right_Ventricle:Spleen
MNT	17	2287354	2304412	2.84E-09	17:2294048:A_C;17:2312842:A_G	Left_Ventricle:Liver
SGSM2	17	2240792	2284352	1.76E-09	17:2294048:A_C;17:2312842:A_G;17:2243628:C_T	Left_Ventricle:Liver
TSR1	17	2225797	2240801	1.76E-09	17:2294048:A_C;17:2312842:A_G;17:2243628:C_T	Left_Ventricle:Liver
HOXB2	17	46618256	46623441	1.23E-08	17:46035001:C_G;17:46563707:G_T;17:47012551:C_G	Aorta:Left_Ventricle:Liver:Spleen
COPZ2	17	46103533	46115392	1.23E-08	17:46035001:C_G	Left_Ventricle:Liver
PNPO	17	46018872	46025654	1.23E-08	17:46035001:C_G;17:46563707:G_T	Aorta:Liver:Pancreas:Spleen
UBE2Z	17	46985731	47006418	1.58E-10	17:46035001:C_G;17:47060322:A_C;17:47123423:C_T;17:47012551:C_G;17:47028472:A_G	Left_Ventricle:Liver
NFE2L1	17	46125691	46138849	4.87E-09	17:46035001:C_G;17:47012551:C_G;17:47028472:A_G	Left_Ventricle:Liver:Spleen
ATP5G1	17	46970127	46973233	1.58E-10	17:46035001:C_G;17:47060322:A_C;17:47123423:C_T;17:47012551:C_G;17:47028472:A_G	Left_Ventricle:Liver
CBX1	17	46147414	46178883	1.43E-08	17:46035001:C_G	Left_Ventricle:Liver
HOXB1	17	46605888	46608359	1.23E-08	17:46035001:C_G;17:46563707:G_T	Aorta:Left_Ventricle:Liver:Spleen
HOXB13	17	46802125	46806540	6.2E-10	17:46035001:C_G;17:47012551:C_G;17:47028472:A_G;17:47060322:A_C;17:47123423:C_T	Aorta:Left_Ventricle:Liver:Spleen
SP2	17	45973516	46006323	4.87E-09	17:46035001:C_G;17:47012551:C_G;17:47028472:A_G	Aorta:Left_Ventricle
PRAC1	17	46799084	46799884	6.2E-10	17:46035001:C_G;17:47012551:C_G;17:47028472:A_G;17:47060322:A_C;17:47123423:C_T	Aorta:Left_Ventricle:Liver:Spleen
ASXL1	20	30946155	31027122	2.32E-20	20:30695145:G_T;20:30725648:A_G;20:31046567:A_C;20:31099311:C_T;20:31102309:A_G;20:31163914:C_G;20:31187504:C_G	Left_Ventricle:Liver
POFUT1	20	30795683	30826470	2.95E-15	20:30695145:G_T;20:30725648:A_G;20:31046567:A_C;20:31099311:C_T	Liver
PLAGL2	20	30780306	30795594	9.28E-16	20:30695145:G_T;20:30725648:A_G;20:31046567:A_C;20:31099311:C_T;20:30675676:A_G	Liver
KIF3B	20	30865467	30922814	9.34E-19	20:30695145:G_T;20:30725648:A_G;20:31046567:A_C;20:31099311:C_T;20:31102309:A_G;20:31163914:C_G	Left_Ventricle:Liver
CSE1L	20	47662849	47713489	6.47E-10	20:47774512:C_T	Liver
STAU1	20	47729878	47804904	6.47E-10	20:47774512:C_T	Left_Ventricle:Liver
DDX27	20	47835884	47860614	8.79E-10	20:47774512:C_T	Left_Ventricle:Liver
LRGUK	7	133812052	133949343	1.8E-10	7:132556835:C_G;7:132658084:A_C;7:132672192:G_T;7:133989882:C_T;7:133894515:C_G	Aorta:Left_Ventricle:Liver
MEIS1	2	66660584	66801001	1.56E-51	2:66726568:C_T;2:66766964:C_T;2:66789341:C_G;2:67022234:A_G;2:68071990:C_G;2:66677816:C_G;2:66730783:A_G;2:66750564:G_T;2:66777521:A_G;2:66792109:A_G;2:66792291:C_T	Adrenal:Aorta:Bladder:Hippocampus:Left_Ventricle:Liver:Lung:Pancreas:Right_Ventricle:Spleen
